# Supplementary material for: Synthesis of continuously substituted quinolines from o-alkenyl aromatic isocyanides by palladium-catalyzed intramolecular imidoylative 6-endo cyclization
Source: Royal Society of Chemistry journal article supplement (doi:10.1039/d4cc05461j), 2024-12-13

**Synthesis of Continuously Substituted Quinolines from *o*-  
Alkenyl Aromatic Isocyanides by Palladium-Catalyzed  
Intramolecular Imidoylative 6-*endo* Cyclization**

## Table of Contents

|                                                          |     |
|----------------------------------------------------------|-----|
| 1. General Information.....                              | S3  |
| 2. Preparation of <i>o</i> -alkenylaryl isocyanides..... | S3  |
| 3. Reaction conditions optimization.....                 | S8  |
| 4. Preparation of Quinolines.....                        | S9  |
| 5. Scale up of <b>3aa</b> .....                          | S18 |
| 6. References.....                                       | S18 |
| 7. Copies of NMR Spectroscopies.....                     | S19 |

## 1. General Information

NMR spectra were recorded on a Bruker AM 400 MHz or 600 MHz spectrometer and calibrated using residual undeuterated solvent as an internal reference ( $\text{CDCl}_3$  ( $^1\text{H}$ ):  $\delta = 7.24$  ppm;  $\text{CDCl}_3$  ( $^{13}\text{C}$ ):  $\delta = 77.23$  ppm). High-resolution mass analysis was performed using a Thermo Scientific™ Q Exactive™ Hybrid Quadrupole-Orbitrap Mass Spectrometer. Melting points were determined on a Stanford Research Systems OptiMelt apparatus. The infrared (IR) spectra were acquired as thin films using a universal ATR sampling accessory on a Bruker Vertex 80 FT-IR spectrometer and the absorption frequencies are reported in  $\text{cm}^{-1}$ . Flash chromatography separations were carried out using silica gel columns. Isocyanides **1b**,<sup>1</sup> **1c**<sup>2</sup> and **1k**<sup>1</sup> were prepared according to literature procedure. All reagents and solvents were obtained from commercial sources and used as is without further purification. All new compounds were characterized by  $^1\text{H}$  NMR,  $^{13}\text{C}$  NMR, HRMS, and IR.

## 2. Preparation of *o*-alkenylaryl isocyanides

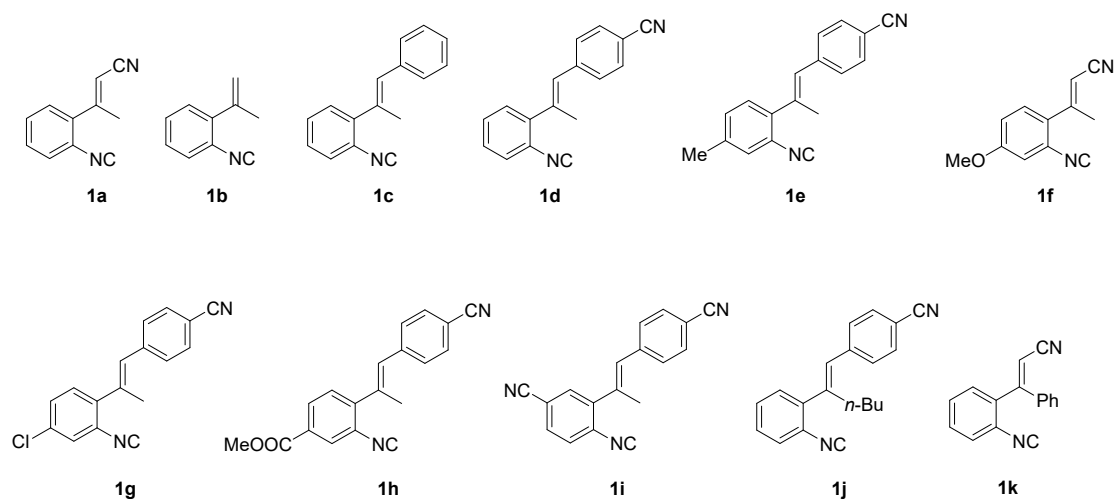

### 2.1 Preparation of **1a**, **1b** and **1f**

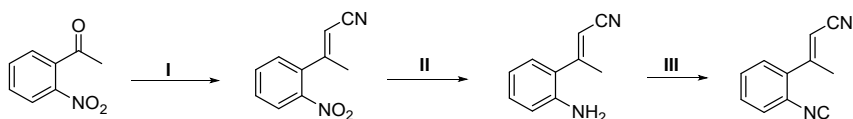

**I** can refer to the Ref 3.

To a solution of 2'-nitroacetophenone (8.0 mmol, 1.0 equiv.) and LiOH (9.6 mmol, 1.2 equiv.) in THF (80.0 mL), was added diethyl cyanomethylphosphonate (1.56 g, 8.8 mmol, 1.1 equiv.). The reaction mixture was stirred at room temperature overnight. The completed reaction was diluted with ethyl acetate (30 mL), washed with water (30 mL) and brine (30 mL), dried (anhydrous Na<sub>2</sub>SO<sub>4</sub>) and concentrated. The residue was purified by column chromatography (Silica Gel, PE/EtOAc) to afford (*E*)-3-(2-nitrophenyl)but-2-enitrile.

**II** can refer to the Ref 3

To a solution of (*E*)-3-(2-nitrophenyl)but-2-enitrile (7.6 mmol, 1.0 equiv.) and Zinc (7.4 g, 114 mmol, 15.0 equiv.) in DCM (80.0 mL, 0.1 M), was added acetic acid (13.1 mL, 30.0 equiv.) dropwise over 10 min. The reaction mixture was stirred at room temperature overnight. The completed reaction was diluted with ethyl acetate (30 mL), washed with water (30 mL) and saturated NaHCO<sub>3</sub> (30 mL), dried (anhydrous Na<sub>2</sub>SO<sub>4</sub>) and concentrated. The residue was purified by column chromatography (Silica Gel, PE/EtOAc) to afford (*E*)-3-(2-aminophenyl)but-2-enitrile.

**III** can refer to the Ref 4.

To a solution of (*E*)-3-(2-aminophenyl)but-2-enitrile (2.0 mmol, 1.0 equiv.) in THF (4.0 mL, 0.50 M), was added acetic formic anhydride (6.0 mmol, 3.0 equiv.) dropwise at 0 °C. The resulting mixture was stirred at room temperature for 1 h. The completed reaction was quenched with water (15 mL) and extracted with DCM (20 mL x 3), The combined organic phase was washed with saturated NaHCO<sub>3</sub> (30 mL), dried (anhydrous Na<sub>2</sub>SO<sub>4</sub>) and concentrated. The residue was purified by column chromatography (Silica Gel, PE/EtOAc) to afford (*E*)-*N*-(2-(1-cyanoprop-1-en-2-yl)phenyl)formamide.

To a solution of (*E*)-*N*-(2-(1-cyanoprop-1-en-2-yl)phenyl)formamide (2.0 mmol, 1.0 equiv.) and Et<sub>3</sub>N (12 mmol, 6.0 equiv.) in THF (10.0 mL, 0.2 M), was added POCl<sub>3</sub> (3.0 equiv.) dropwise at 0 °C. The resulting mixture was warmed up to room temperature and stirred for 6 hours. The completed reaction was quenched with water (15 mL) and extracted with DCM (30 mL x 3). The combined organic phase was dried (anhydrous Na<sub>2</sub>SO<sub>4</sub>) and concentrated. The residue was purified by column chromatography (Silica Gel, PE/EtOAc) to afford **1**.

**(*E*)-3-(2-isocyanophenyl)but-2-enitrile (1a):**

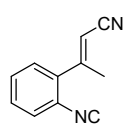

**1a**

Flash chromatography (Silica Gel, PE/EtOAc) afforded **1a** (0.242 g, 72%) as a light-yellow oil; <sup>1</sup>H NMR (400 MHz, Chloroform-*d*) δ 7.49 – 7.40 (m,

3H), 7.29 – 7.26 (m, 1H), 5.50 (d,  $J = 1.3$  Hz, 1H), 2.49 (d,  $J = 1.2$  Hz, 3H);  $^{13}\text{C}$  NMR (151 MHz, Chloroform- $d$ )  $\delta$  169.1, 157.7, 137.3, 130.2, 129.9, 128.4, 128.3, 125.6, 116.1, 101.7, 21.9; IR (neat): 2883, 2218, 2119, 1514, 754  $\text{cm}^{-1}$ ; HRMS (ESI)  $m/z$ :  $[\text{M}+\text{H}]^+$  calculated for  $\text{C}_{11}\text{H}_9\text{N}_2^+$  169.0760, found 169.0763.

### (*E*)-3-(2-isocyano-4-methoxyphenyl)but-2-enitrile (**1f**)

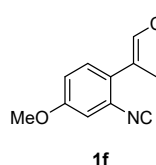

Flash chromatography (Silica Gel, PE/EtOAc) afforded **1f** (0.322 g, 81%) as a colorless oil;  $^1\text{H}$  NMR (400 MHz, Chloroform- $d$ )  $\delta$  7.19 (d,  $J = 8.4$  Hz, 1H), 6.96 (m, 2H), 5.49 (s, 1H), 3.84 (s, 3H), 2.46 (s, 3H);  $^{13}\text{C}$  NMR (151 MHz, Chloroform- $d$ )  $\delta$  168.8, 160.4, 157.0, 129.4, 129.1, 124.3, 116.3, 115.9, 113.3, 100.6, 55.7, 21.7; IR (neat): 2881, 2208, 2113, 1508, 736  $\text{cm}^{-1}$ ; HRMS (ESI)  $m/z$ :  $[\text{M}+\text{H}]^+$  calculated for  $\text{C}_{12}\text{H}_{11}\text{N}_2\text{O}^+$  199.0866, found 199.0872.

### (*E*)-3-(2-isocyanophenyl)-3-phenylacrylonitrile (**1k**)

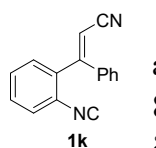

Flash chromatography (Silica Gel, PE/EtOAc) afforded **1k** (0.418 g, 91%) as a yellow solid.  $^1\text{H}$  NMR (400 MHz, Chloroform- $d$ )  $\delta$  7.51 – 7.41 (m, 8H), 7.38 – 7.32 (m, 1H), 5.68 (s, 1H).  $^{13}\text{C}$  NMR (101 MHz, Chloroform- $d$ )  $\delta$  169.2, 158.7, 136.7, 135.9, 130.9, 130.7, 130.6, 129.7, 129.0, 128.9, 128.2, 116.9, 99.3 (one carbon missing due to overlap); HRMS (ESI)  $m/z$ :  $[\text{M}+\text{H}]^+$  calculated for  $\text{C}_{16}\text{H}_{11}\text{N}_2^+$  231.0917, found 231.0908.

## 2.2 Preparation of **1d-e** and **1g-1l**

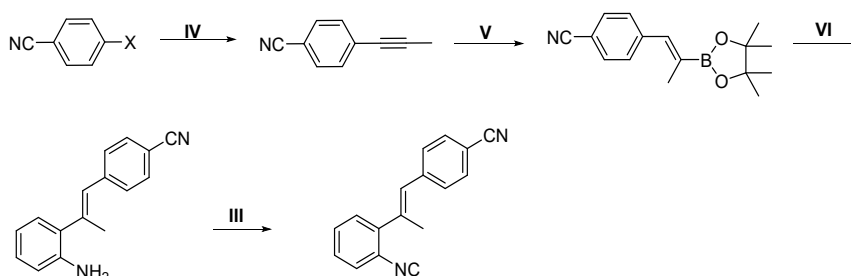

**IV** can refer to the Ref 5.

To a solution of 4-Iodobenzonitrile (3.0 mmol, 1.0 equiv.),  $\text{PdCl}_2(\text{PPh}_3)_2$  (0.06 mmol, 0.02 equiv.) and  $\text{CuI}$  (0.12 mmol, 0.04 equiv.) in  $\text{Et}_3\text{N}$  (9.0 mL, 0.3 M) was added terminal alkyne (4.5 mmol, 1.5 equiv.). The reaction mixture was heated in a 55  $^\circ\text{C}$  oil bath under argon for 5 h. After cooling to room temperature, the completed reaction was diluted with ethyl acetate (30 mL), washed with water (30 mL) and brine (30 mL), dried (anhydrous  $\text{Na}_2\text{SO}_4$ ) and concentrated. The residue was purified by column chromatography (Silica Gel, PE/EtOAc) to afford 4-alkynylbenzonitrile.

**V** can refer to the Ref. 6.

To an oven dried schlenk tube equipped with a stir bar were added  $\text{CuCl}$  (0.15 mmol, 0.05 equiv.),  $\text{NaOt-Bu}$  (0.6 mmol, 0.2 equiv.), tri-*p*-tolylphosphine (0.3 mmol,

0.1 equiv.) and THF (2.4 mL) under nitrogen. After the mixture was stirred at room temperature for 30 min, bis(pinacolato)diboron (3.3 mmol, 1.1 equiv.) dissolved in THF (1.8 mL) was added. The reaction mixture was stirred for 10 min. Then, internal alkyne (3.0 mmol) was added followed by MeOH (6 mmol, 2.0 equiv.). The reaction was washed with THF (1.8 mL), sealed, and stirred until no starting material was detected by TLC. The reaction mixture was filtered through a pad of Celite and concentrated. The product was purified by column chromatography (Silica Gel, PE/EtOAc) to afford (Z)-4-(2-(4,4,5,5-tetramethyl-1,3,2-dioxaborolan-2-yl)prop-1-en-1-yl)benzonitrile.

VI can refer to the Ref. 7.

To a solution of (Z)-4-(2-(4,4,5,5-tetramethyl-1,3,2-dioxaborolan-2-yl)prop-1-en-1-yl)benzonitrile (3.0 mmol, 1.0 equiv.) and 2-bromoaniline (3.0 mmol, 1.0 equiv.) in DMF (5.0 mL, 0.6 M) was added Pd(PPh<sub>3</sub>)<sub>4</sub> (0.15 mmol, 5 mol %) and Na<sub>2</sub>CO<sub>3</sub> (2.0 M in H<sub>2</sub>O, 3.0 equiv.) under argon atmosphere. The reaction mixture was heated in an oil bath at 80 °C under argon atmosphere overnight. After cooling to room temperature, the completed reaction was diluted with ethyl acetate (30 mL), washed with water (30 mL) and brine (30 mL), dried (anhydrous Na<sub>2</sub>SO<sub>4</sub>) and concentrated. The residue was purified by column chromatography (Silica Gel, PE/EtOAc) to afford (E)-4-(2-(2-aminophenyl)prop-1-en-1-yl)benzonitrile.

III can refer to the Ref 4.

To a solution of (E)-3-(2-aminophenyl)but-2-enenitrile (2.0 mmol, 1.0 equiv.) in THF (4.0 mL, 0.50 M), was added acetic formic anhydride (6.0 mmol, 3.0 equiv.) dropwise at 0 °C. The resulting mixture was stirred at room temperature for 1 h. The completed reaction was quenched with water (15 mL) and extracted with DCM (20 mL x 3), The combined organic phase was washed with saturated NaHCO<sub>3</sub> (30 mL), dried (anhydrous Na<sub>2</sub>SO<sub>4</sub>) and concentrated. The residue was purified by column chromatography (Silica Gel, PE/EtOAc) to afford (E)-N-(2-(1-cyanoprop-1-en-2-yl)phenyl)formamide.

To a solution of (E)-N-(2-(1-cyanoprop-1-en-2-yl)phenyl)formamide (2.0 mmol, 1.0 equiv.) and Et<sub>3</sub>N (12 mmol, 6.0 equiv.) in THF (10.0 mL, 0.2 M), was added POCl<sub>3</sub> (3.0 equiv.) dropwise at 0 °C. The resulting mixture was warmed up to room temperature and stirred for 6 hours. The completed reaction was quenched with water (15 mL) and extracted with DCM (30 mL x 3). The combined organic phase was dried (anhydrous Na<sub>2</sub>SO<sub>4</sub>) and concentrated. The residue was purified by column chromatography (Silica Gel, PE/EtOAc) to afford **1**.

#### (E)-4-(2-(2-isocyanophenyl)prop-1-en-1-yl)benzonitrile (**1d**)

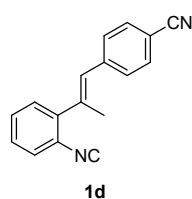

Flash chromatography (Silica Gel, PE/EtOAc) afforded **1d** (0.316 g, 65%) as a light yellow solid; m.p.: 93-94 °C. <sup>1</sup>H NMR (400 MHz, Chloroform-*d*) δ 7.68 (d, *J* = 8.3 Hz, 2H), 7.49 (d, *J* = 8.3 Hz, 2H), 7.46 – 7.39 (m, 2H), 7.39 – 7.32 (m, 2H), 6.59 (s, 1H), 2.28 (d, *J* = 1.5 Hz, 3H); <sup>13</sup>C NMR (101 MHz, Chloroform-*d*) δ 167.0, 142.2,

141.8, 137.8, 132.2, 130.3, 129.7, 129.6, 129.0, 128.4, 127.7, 124.3, 119.0, 110.6, 19.1; IR (neat): 2877, 2223, 2119, 1508, 752  $\text{cm}^{-1}$ ; HRMS (ESI)  $m/z$   $[M+H]^+$  calculated for  $\text{C}_{17}\text{H}_{13}\text{N}_2^+$  245.1073, found 245.1076.

**(E)-4-(2-(2-isocyano-4-methylphenyl)prop-1-en-1-yl)benzonitrile (1e)**

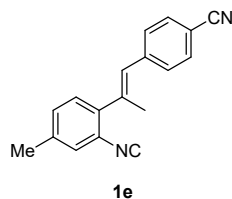

Flash chromatography (Silica Gel, PE/EtOAc) afforded **1e** (0.397 g, 77%) as a light yellow solid; m.p.: 87-88 °C.  $^1\text{H}$  NMR (400 MHz, Chloroform-*d*)  $\delta$  7.69 (d,  $J = 8.1$  Hz, 2H), 7.51 (d,  $J = 8.0$  Hz, 2H), 7.24-7.28 (m, 3H), 6.60 (s, 1H), 2.40 (s, 3H), 2.29 (s, 3H);  $^{13}\text{C}$  NMR (151 MHz, Chloroform-*d*)  $\delta$  160.8, 148.4, 146.4, 143.3, 139.7, 135.1, 132.2, 131.5, 129.7, 128.3, 126.5, 126.2, 120.3, 111.8, 16.8 (one carbon missing due to overlap); IR (neat): 2879, 2225, 2117, 1508, 729  $\text{cm}^{-1}$ ; HRMS (ESI)  $m/z$ :  $[M+H]^+$  calculated for  $\text{C}_{18}\text{H}_{15}\text{N}_2^+$  259.1230, found 259.1932.

**(E)-4-(2-(4-chloro-2-isocyanophenyl)prop-1-en-1-yl)benzonitrile (1g)**

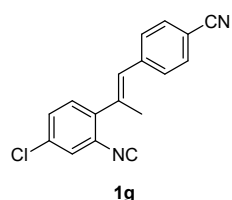

Flash chromatography (Silica Gel, PE/EtOAc) afforded **1g** (0.40 g, 53%) as a light yellow solid. m.p.: 104-105 °C.  $^1\text{H}$  NMR (400 MHz, Chloroform-*d*)  $\delta$  7.68 (d,  $J = 8.1$  Hz, 2H), 7.48 (d,  $J = 8.0$  Hz, 2H), 7.45 – 7.38 (m, 2H), 7.31 (d,  $J = 8.3$  Hz, 1H), 6.59 (s, 1H), 2.26 (d,  $J = 1.4$  Hz, 3H);  $^{13}\text{C}$  NMR (101 MHz, Chloroform-*d*)  $\delta$  168.7, 141.5, 140.7, 136.7, 133.8, 132.3, 130.9, 130.2, 130.0, 129.4, 127.6, 125.1, 118.9, 110.9, 19.0; IR (neat): 2882, 2223, 2119, 1512, 727  $\text{cm}^{-1}$ ; HRMS (ESI)  $m/z$ :  $[M+H]^+$  calculated for  $\text{C}_{17}\text{H}_{12}\text{ClN}_2^+$  279.0689, found 279.0685.

**Methyl (E)-4-(1-(4-cyanophenyl)prop-1-en-2-yl)-3-isocyanobenzoate (1h)**

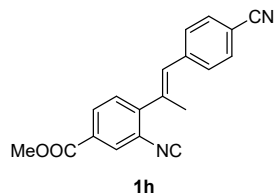

Flash chromatography (Silica Gel, PE/EtOAc) afforded **1h** (0.428 g, 71%) as a light yellow solid; m.p.: 179-180 °C;  $^1\text{H}$  NMR (400 MHz, Chloroform-*d*)  $\delta$  8.09 (s, 1H), 8.07 (d,  $J = 8.0$  Hz, 1H), 7.69 (d,  $J = 8.1$  Hz, 2H), 7.50 (d,  $J = 8.1$  Hz, 2H), 7.45 (d,  $J = 8.0$  Hz, 1H), 6.64 (s, 1H), 3.96 (s, 3H), 2.30 (s, 3H);  $^{13}\text{C}$  NMR (101 MHz, Chloroform-*d*)  $\delta$  168.4, 165.2, 146.3, 141.4, 137.0, 132.3, 131.2, 130.6, 129.8, 129.4, 128.9, 124.6, 118.9, 111.0, 52.8, 18.9 (one carbon missing due to overlap); IR (neat): 2884, 2220, 2117, 1514, 748  $\text{cm}^{-1}$ ; HRMS (ESI)  $m/z$ :  $[M+H]^+$  calculated for  $\text{C}_{19}\text{H}_{15}\text{N}_2\text{O}_2^+$  303.1128, found 303.1141.

**(E)-3-(1-(4-cyanophenyl)prop-1-en-2-yl)-4-isocyanobenzonitrile (1i)**

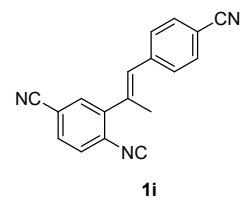

Flash chromatography (Silica Gel, PE/EtOAc) afforded **1i** (0.242 g, 45%) as a light yellow solid. m.p.: 138-139 °C;  $^1\text{H}$  NMR (600 MHz, Chloroform-*d*)  $\delta$  7.73 – 7.68 (m, 3H), 7.66 (dd,  $J = 8.2, 1.8$  Hz, 1H), 7.55 (d,  $J = 8.2$  Hz, 1H), 7.49 (d,  $J = 8.1$  Hz, 2H), 6.63 (s, 1H), 2.28 (d,  $J = 1.5$  Hz, 3H);  $^{13}\text{C}$  NMR (151 MHz, Chloroform-*d*)  $\delta$  143.4, 140.9, 135.7, 133.1, 132.4, 132.0, 129.8, 128.7, 125.5, 118.8, 117.2, 113.8, 111.4, 18.9 (two carbon missing due to overlap); IR (neat): 2884, 2227, 2119, 1512, 729  $\text{cm}^{-1}$ ; HRMS (ESI)  $m/z$ :  $[M+H]^+$  calculated for  $\text{C}_{18}\text{H}_{12}\text{N}_3^+$  270.1026;

found 270.1041.

### (*E*)-4-(2-(2-isocyanophenyl)hex-1-en-1-yl)benzonitrile (**1j**)

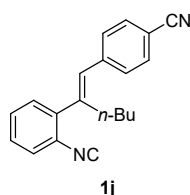

Flash chromatography (Silica Gel, PE/EtOAc) afforded **1j** (0.314 g, 55%) as colorless oil. <sup>1</sup>H NMR (400 MHz, Chloroform-*d*) δ 7.67 (d, *J* = 8.1 Hz, 2H), 7.48 – 7.39 (m, 4H), 7.38 – 7.31 (m, 2H), 6.53 (s, 1H), 2.66 (t, *J* = 7.3 Hz, 2H), 1.24-1.29 (m, 4H), 0.80 (t, *J* = 6.8 Hz, 3H); <sup>13</sup>C NMR (151 MHz, Chloroform-*d*) δ 166.8, 142.7, 142.0, 140.8, 132.3, 130.2, 129.6, 129.5, 129.4, 128.3, 127.6, 124.9, 119.0, 110.7, 31.4, 30.5, 22.7, 13.9; IR (neat): 2954, 2225, 2119, 1508, 752 cm<sup>-1</sup>; HRMS (ESI) *m/z*: [M+H]<sup>+</sup> calculated for C<sub>20</sub>H<sub>19</sub>N<sub>2</sub><sup>+</sup> 287.1543, found 287.1542.

### 3. Reaction conditions optimization<sup>a</sup>

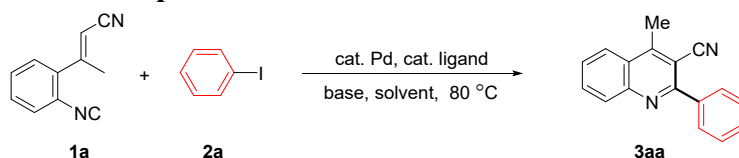

| entry           | Catalyst (mol%)                         | Ligand (mol%)                        | Base (equiv.) | Solvent | Addition of <b>1a</b> | Yield (%) |
|-----------------|-----------------------------------------|--------------------------------------|---------------|---------|-----------------------|-----------|
| 1               | Pd(OAc) <sub>2</sub> (10)               | PPh <sub>3</sub> (20)                | CsOPiv (1.2)  | Toluene | 1.0 mL over 1 h       | 24        |
| 2               | Pd(dba) <sub>2</sub> (10)               | PPh <sub>3</sub> (20)                | CsOPiv (1.2)  | Toluene | 1.0 mL over 1 h       | 24        |
| 3               | Pd(dba) <sub>2</sub> (10)               | PPh <sub>3</sub> (40)                | CsOPiv (1.2)  | Toluene | 1.0 mL over 1 h       | 37        |
| 4               | Pd <sub>2</sub> (dba) <sub>3</sub> (5)  | PPh <sub>3</sub> (40)                | CsOPiv (1.2)  | Toluene | 1.0 mL over 1 h       | 21        |
| 5               | Pd(PPh <sub>3</sub> ) <sub>4</sub> (10) | -                                    | CsOPiv (1.2)  | Toluene | 1.0 mL over 1 h       | 44        |
| 6               | Pd(dba) <sub>2</sub> (10)               | P( <i>o</i> -tol) <sub>3</sub> (40)  | CsOPiv (1.2)  | Toluene | 1.0 mL over 1 h       | trace     |
| 7               | Pd(dba) <sub>2</sub> (10)               | RuPhos (20)                          | CsOPiv (1.2)  | Toluene | 1.0 mL over 1 h       | trace     |
| 8               | Pd(dba) <sub>2</sub> (10)               | Ad <sub>2</sub> P <i>n</i> -Bu (0.4) | CsOPiv (1.2)  | Toluene | 1.0 mL over 1 h       | 29        |
| 10              | Pd(dba) <sub>2</sub> (10)               | BINAP (20)                           | CsOPiv (1.2)  | Toluene | 1.0 mL over 1 h       | trace     |
| 11              | Pd(dba) <sub>2</sub> (10)               | dppm (20)                            | CsOPiv (1.2)  | Toluene | 1.0 mL over 1 h       | 11        |
| 12              | Pd(dba) <sub>2</sub> (10)               | DPEphos (20)                         | CsOPiv (1.2)  | Toluene | 1.0 mL over 1 h       | 25        |
| 13              | Pd(dba) <sub>2</sub> (10)               | Xantphos (20)                        | CsOPiv (1.2)  | Toluene | 1.0 mL over 1 h       | trace     |
| 14              | Pd(dba) <sub>2</sub> (10)               | dppe (20)                            | CsOPiv (1.2)  | Toluene | 1.0 mL over 1 h       | trace     |
| 15              | Pd(dba) <sub>2</sub> (10)               | dppp (20)                            | CsOPiv (1.2)  | Toluene | 1.0 mL over 1 h       | 9         |
| 16              | Pd(dba) <sub>2</sub> (10)               | dppb (20)                            | CsOPiv (1.2)  | Toluene | 1.0 mL over 1 h       | trace     |
| 17              | Pd(dba) <sub>2</sub> (10)               | dppf (20)                            | CsOPiv (1.2)  | Toluene | 1.0 mL over 1 h       | N.R.      |
| 20 <sup>b</sup> | Pd(PPh <sub>3</sub> ) <sub>4</sub> (10) | -                                    | CsOPiv (1.2)  | Toluene | 1.0 mL over 1 h       | 35        |
| 21 <sup>c</sup> | Pd(PPh <sub>3</sub> ) <sub>4</sub> (10) | -                                    | CsOPiv (1.2)  | Toluene | 1.0 mL over 1 h       | 30        |
| 22              | Pd(PPh <sub>3</sub> ) <sub>4</sub> (10) | -                                    | CsOPiv (1.2)  | Toluene | one portion           | trace     |
| 23              | Pd(PPh <sub>3</sub> ) <sub>4</sub> (10) | -                                    | CsOPiv (1.2)  | Toluene | 1.0 mL over 2 h       | 62        |
| 24              | Pd(PPh <sub>3</sub> ) <sub>4</sub> (10) | -                                    | CsOPiv (1.2)  | Toluene | 2.0 mL over 2 h       | 48        |
| 25              | Pd(PPh <sub>3</sub> ) <sub>4</sub> (10) | -                                    | CsOPiv (1.2)  | Toluene | 1.0 mL over 3 h       | 68        |
| 26              | Pd(PPh <sub>3</sub> ) <sub>4</sub> (10) | -                                    | CsOPiv (1.2)  | Toluene | 2.0 mL over 4 h       | 56        |
| 27              | Pd(PPh <sub>3</sub> ) <sub>4</sub> (10) | -                                    | CsOPiv (1.2)  | Toluene | 1.0 mL over 3.5 h     | 45        |
| 29              | Pd(PPh <sub>3</sub> ) <sub>4</sub> (10) | -                                    | CsOPiv (1.2)  | dioxane | 1.0 mL over 3 h       | 31        |



|                 |                                         |   |                                                       |                      |                 |       |
|-----------------|-----------------------------------------|---|-------------------------------------------------------|----------------------|-----------------|-------|
| 30              | Pd(PPh <sub>3</sub> ) <sub>4</sub> (10) | - | CsOPiv (1.2)                                          | DMF                  | 1.0 mL over 3 h | 22    |
| 31              | Pd(PPh <sub>3</sub> ) <sub>4</sub> (10) | - | CsOPiv (1.2)                                          | DCE                  | 1.0 mL over 3 h | 13    |
| 32              | Pd(PPh <sub>3</sub> ) <sub>4</sub> (10) | - | CsOPiv (1.2)                                          | DMSO                 | 1.0 mL over 3 h | 36    |
| 33              | Pd(PPh <sub>3</sub> ) <sub>4</sub> (10) | - | CsOPiv (1.2)                                          | MeCN                 | 1.0 mL over 3 h | 19    |
| 34              | Pd(PPh <sub>3</sub> ) <sub>4</sub> (10) | - | CsOPiv (1.2)                                          | NMP                  | 1.0 mL over 3 h | 13    |
| 35              | Pd(PPh <sub>3</sub> ) <sub>4</sub> (10) | - | CsOPiv (1.2)                                          | Toluene: MeCN<br>1:1 | 1.0 mL over 3 h | 26    |
| 36              | Pd(PPh <sub>3</sub> ) <sub>4</sub> (10) | - | CsOPiv (1.2)                                          | Toluene:DMS<br>01:1  | 1.0 mL over 3 h | 28    |
| 37 <sup>d</sup> | Pd(PPh <sub>3</sub> ) <sub>4</sub> (10) | - | CsOPiv (1.2)                                          | Toluene              | 1.0 mL over 3 h | 49    |
| 38 <sup>e</sup> | Pd(PPh <sub>3</sub> ) <sub>4</sub> (10) | - | CsOPiv (1.2)                                          | Toluene              | 1.0 mL over 3 h | 51    |
| 39 <sup>f</sup> | Pd(PPh <sub>3</sub> ) <sub>4</sub> (10) | - | CsOPiv (1.2)                                          | Toluene              | 1.0 mL over 3 h | 43    |
| 40              | Pd(PPh <sub>3</sub> ) <sub>4</sub> (5)  | - | CsOPiv (1.2)                                          | Toluene              | 1.0 mL over 3 h | 31    |
| 41              | Pd(PPh <sub>3</sub> ) <sub>4</sub> (10) | - | Na <sub>2</sub> CO <sub>3</sub> (1.2)                 | Toluene              | 1.0 mL over 3 h | trace |
| 42              | Pd(PPh <sub>3</sub> ) <sub>4</sub> (10) | - | Cs <sub>2</sub> CO <sub>3</sub> (1.2)                 | Toluene              | 1.0 mL over 3 h | trace |
| 43              | Pd(PPh <sub>3</sub> ) <sub>4</sub> (10) | - | NaOAc (1.2)                                           | Toluene              | 1.0 mL over 3 h | trace |
| 44              | Pd(PPh <sub>3</sub> ) <sub>4</sub> (10) | - | Et <sub>3</sub> N (1.2)                               | Toluene              | 1.0 mL over 3 h | trace |
| 45              | Pd(PPh <sub>3</sub> ) <sub>4</sub> (10) | - | Cs <sub>2</sub> CO <sub>3</sub> (0.6)<br>/PivOH (1.2) | Toluene              | 1.0 mL over 3 h | 67    |
| 46 <sup>g</sup> | Pd(PPh <sub>3</sub> ) <sub>4</sub> (10) | - | Cs <sub>2</sub> CO <sub>3</sub> (0.6)<br>/TMCA (1.2)  | Toluene              | 1.0 mL over 3 h | 95    |

<sup>a</sup>Reaction conditions: to a solution of **2a** (1.5 equiv.), Pd catalyst, ligand and base in solvent (1.0 mL) at 80 °C under Ar, was added a solution of **1a** (0.2 mmol) in solvent as indicated by using a syringe pump. <sup>b</sup>100 °C. <sup>c</sup>60 °C. <sup>d</sup>2.0 equiv. of **2a**. <sup>e</sup>2.0 equiv. of **2a**. <sup>f</sup>0.83 equiv. of **2a**. <sup>g</sup>2,2,3,3-tetramethylcyclopropanecarboxylic acid (TMCA).

## 4. Preparation of Quinolines

### 4.1 from aryl iodides

To a 20 mL vial was added Pd(PPh<sub>3</sub>)<sub>4</sub> (0.0236 g, 0.02 mmol, 0.1 equiv.), Cs<sub>2</sub>CO<sub>3</sub> (0.0391 g, 0.12 mmol, 0.6 equiv.), TMCA (2,2,3,3-tetramethylcyclopropane carboxylic acid) (0.0341 g, 0.24 mmol, 1.2 equiv.) and a solution of aryl iodide (0.3 mmol, 1.5 equiv.) in toluene (1 mL) under argon. The resulting mixture was heated at 80 °C heating block for 30 min. Then a solution of isocyanide (0.2 mmol, 1.0 equiv.) in toluene (1 mL) was added to the reaction mixture dropwise over 3 h using a syringe pump. After further 1 h, the completed reaction was diluted with DCM (20 mL) and washed with satd. NaHCO<sub>3</sub> (20 mL x 2). The combined aqueous phase was back extracted with DCM (15 mL x 2). The combined organic phase was dried (anhydrous Na<sub>2</sub>SO<sub>4</sub>) and concentrated. The residue was purified by column chromatography (Silica Gel, PE/EtOAc) to afford the quinoline product **3**.

### 4-Methyl-2-phenylquinoline-3-carbonitrile (**3aa**)

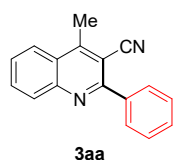

Flash chromatography (Silica Gel, PE/EtOAc) afforded **3aa** (0.046 g, 95%) as a light yellow solid; <sup>1</sup>H NMR (400 MHz, Chloroform-*d*) δ 8.20 (d, *J* = 8.4 Hz, 1H), 8.11 (dd, *J* = 8.3, 1.3 Hz, 1H), 7.98 – 7.91 (m,

2H), 7.90 – 7.83 (m, 1H), 7.73 – 7.64 (m, 1H), 7.61 – 7.49 (m, 3H), 3.05 (s, 3H). <sup>13</sup>C NMR (101 MHz, Chloroform-*d*) δ 158.9, 153.3, 148.4, 132.8, 131.2, 130.4, 129.7, 129.1, 128.3, 125.7, 124.8, 117.9, 18.2 (two carbon missing due to overlap); The spectroscopic data are in accordance with those reported in literature.<sup>8</sup>

#### 4-Methyl-2-(*p*-tolyl)quinoline-3-carbonitrile (**3ab**)

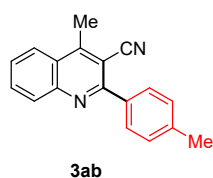

Flash chromatography (Silica Gel, PE/EtOAc) afforded **3ab** (0.046 g, 89%) as light yellow solid; m.p.: 136-139 °C; <sup>1</sup>H NMR (400 MHz, Chloroform-*d*) δ 8.12 (d, *J* = 8.4 Hz, 1H), 8.04 (d, *J* = 8.5 Hz, 1H), 7.83 – 7.76 (m, 3H), 7.65 – 7.56 (m, 1H), 7.30 (d, *J* = 7.9 Hz, 2H), 2.98 (s, 3H), 2.39 (s, 3H); <sup>13</sup>C NMR (101 MHz, CDCl<sub>3</sub>) δ 158.6, 153.0, 148.1, 140.3, 135.7, 132.6, 130.7, 129.5, 129.3, 127.8, 125.2, 124.5, 117.8, 106.5, 21.7, 18.0; IR (neat): 2924, 2210, 1584, 1341; HRMS (ESI) *m/z*: [M+H]<sup>+</sup> calculated for C<sub>18</sub>H<sub>15</sub>N<sub>2</sub><sup>+</sup> 259.1230, found 259.1230.

#### 2-(4-Methoxyphenyl)-4-methylquinoline-3-carbonitrile (**3ac**)

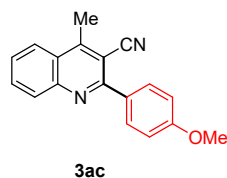

Flash chromatography (Silica Gel, PE/EtOAc) afforded **3ac** (0.023 g, 41%) as light yellow solid; m.p.: 182-183 °C; <sup>1</sup>H NMR (400 MHz, Chloroform-*d*) δ 8.10 (d, *J* = 8.5 Hz, 1H), 8.02 (d, *J* = 8.9 Hz, 1H), 7.88 (d, *J* = 8.7 Hz, 2H), 7.78 – 7.75 (m, 1H), 7.63 – 7.54 (m, 1H), 7.01 (d, *J* = 8.8 Hz, 2H), 3.84 (s, 3H), 2.97 (s, 3H); <sup>13</sup>C NMR (101 MHz, CDCl<sub>3</sub>) δ 161.2, 158.1, 153.1, 148.1, 132.6, 130.9, 130.6, 127.7, 125.1, 124.5, 118.0, 114.2, 106.3, 55.6, 18.0 (one carbon missing due to overlap); IR (neat) : 3060, 2240, 1551, 1495, 1380 cm<sup>-1</sup>; HRMS (ESI) *m/z*: [M+H]<sup>+</sup> calculated for C<sub>18</sub>H<sub>15</sub>N<sub>2</sub>O<sup>+</sup> 275.1179, found 275.1179.

#### 2-([1,1'-biphenyl]-4-yl)-4-methylquinoline-3-carbonitrile (**3ad**)

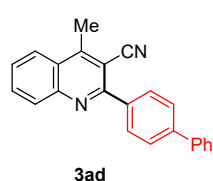

Flash chromatography (Silica Gel, PE/EtOAc) afforded **3ad** (0.057 g, 89%) as a white solid; m.p.: 145-146 °C; <sup>1</sup>H NMR (400 MHz, Chloroform-*d*) δ 8.21 (d, *J* = 7.9 Hz, 1H), 8.11 (d, *J* = 8.5 Hz, 1H), 8.05 (d, *J* = 8.3 Hz, 2H), 7.91 – 7.84 (m, 1H), 7.79 (d, *J* = 8.3 Hz, 2H), 7.73 – 7.64 (m, 2H), 7.52 – 7.44 (m, 2H), 7.43 – 7.36 (m, 1H), 3.06 (s, 3H); <sup>13</sup>C NMR (101 MHz, Chloroform-*d*) δ 158.0, 153.0, 148.0, 142.8, 140.5, 137.2, 132.5, 130.7, 129.7, 128.9, 127.8, 127.8, 127.4, 127.3, 125.2, 124.4, 117.6, 106.3, 17.9; IR (neat): 2922, 2218, 1490, 1272, 846, 740; HRMS (ESI) *m/z*: [M+H]<sup>+</sup> calculated for C<sub>23</sub>H<sub>17</sub>N<sub>2</sub><sup>+</sup> 321.1386, found 321.1391.

#### 2-(4-chlorophenyl)-4-methylquinoline-3-carbonitrile (**3ae**)

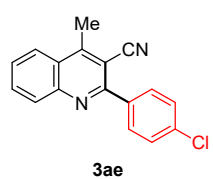

Flash chromatography (Silica Gel, PE/EtOAc) afforded **3ae** (0.041 g, 74%) as a white solid; m.p.: 190-191 °C; <sup>1</sup>H NMR (400 MHz, Chloroform-*d*) δ 8.17 (d, *J* = 8.5 Hz, 1H), 8.11 (d, *J* = 8.5 Hz, 1H), 7.94 – 7.83 (m, 3H), 7.72 – 7.66 (m, 1H), 7.53 (d, *J* = 8.6 Hz, 2H), 3.04 (s, 3H); <sup>13</sup>C NMR (101 MHz, Chloroform-*d*) δ 156.9, 152.9, 147.6, 136.4, 136.1, 132.4, 130.4, 128.7, 127.9, 125.0, 124.2, 117.1, 105.9, 17.7 (one

carbon missing due to overlap); IR (neat): 2900, 2360, 1514, 1269, 1095, 740; HRMS (ESI)  $m/z$ :  $[M+H]^+$  calculated for  $C_{17}H_{12}CN_2^+$  279.0684, found 279.0680.

### 2-(4-acetylphenyl)-4-methylquinoline-3-carbonitrile (3af)

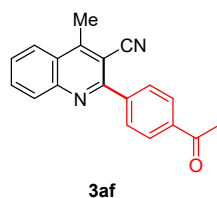

Flash chromatography (Silica Gel, PE/EtOAc) afforded **3af** (0.045 g, 79%) as a white solid; m.p.: 196-197 °C;  $^1H$  NMR (400 MHz, Chloroform-*d*)  $\delta$  8.20 (d,  $J = 8.5$  Hz, 1H), 8.12-8.16 (m, 3H), 8.05 (d,  $J = 8.1$  Hz, 2H), 7.93 – 7.86 (m, 1H), 7.75 – 7.69 (m, 1H), 3.06 (s, 3H), 2.69 (s, 3H);  $^{13}C$  NMR (101 MHz, Chloroform-*d*)  $\delta$  197.8, 157.3, 153.3, 147.9, 142.6, 137.9, 132.8, 130.8, 129.7, 128.7, 128.4, 125.5, 124.5, 117.3, 106.3, 27.0, 18.0; IR (neat): 2910, 2362, 1745, 1513, 1274, 738; HRMS (ESI)  $m/z$ :  $[M+H]^+$  calculated for  $C_{19}H_{15}N_2O^+$  287.1179, found 287.1176.

### 4-methyl-2-(4-(trifluoromethyl)phenyl)quinoline-3-carbonitrile (3ag)

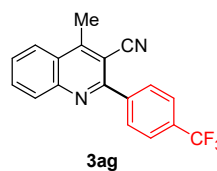

Flash chromatography (Silica Gel, PE/EtOAc) afforded **3ag** (0.057 g, 91%) as a white solid; m.p.: 151-152 °C;  $^1H$  NMR (400 MHz, Chloroform-*d*)  $\delta$  8.20 (d,  $J = 8.5$  Hz, 1H), 8.14 (d,  $J = 8.5$  Hz, 1H), 8.07 (d,  $J = 8.1$  Hz, 2H), 7.94 – 7.86 (m,  $J = 7.7$  Hz, 1H), 7.82 (d,  $J = 8.0$  Hz, 2H), 7.76 – 7.69 (m, 1H), 3.07 (s, 3H);  $^{13}C$  NMR (101 MHz, Chloroform-*d*)  $\delta$  157.0, 153.4, 147.9, 141.7, 132.9, 132.1 (q,  $J = 33$  Hz), 130.8, 129.8, 128.5, 125.7 (q,  $J = 4.0$  Hz), 125.5, 124.5, 117.3, 106.2, 18.0 (one carbon missing);  $^{19}F$  NMR (377 MHz,  $CDCl_3$ )  $\delta$  -62.74; IR (neat): 2917, 2221, 1546, 1325, 1114, 846; HRMS (ESI)  $m/z$ :  $[M+H]^+$  calculated for  $C_{18}H_{12}F_3N_2^+$  313.0947, found 313.0947.

### 2-(4-cyanophenyl)-4-methylquinoline-3-carbonitrile (3ah)

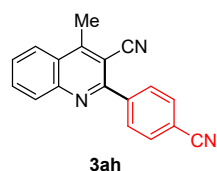

Flash chromatography (Silica Gel, PE/EtOAc) afforded **3ah** (0.033 g, 62%) as a white solid; m.p.: 223-224 °C;  $^1H$  NMR (400 MHz, Chloroform-*d*)  $\delta$  8.19 (d,  $J = 8.4$  Hz, 1H), 8.14 (d,  $J = 8.5$  Hz, 1H), 8.08 (d,  $J = 8.3$  Hz, 2H), 7.96 – 7.89 (m, 1H), 7.86 (d,  $J = 8.3$  Hz, 2H), 7.78 – 7.70 (m, 1H), 3.07 (s, 3H);  $^{13}C$  NMR (101 MHz, Chloroform-*d*)  $\delta$  156.3, 153.6, 147.9, 142.5, 133.1, 132.5, 130.8, 130.1, 128.7, 125.6, 124.6, 118.6, 117.1, 113.7, 106.0, 18.1; IR (neat): 2898, 2358, 1507, 1269, 732; HRMS (ESI)  $m/z$ :  $[M+H]^+$  calculated for  $C_{18}H_{12}N_3^+$  270.1026, found 270.1031.

### ethyl 4-(3-cyano-4-methylquinolin-2-yl)benzoate (3ai)

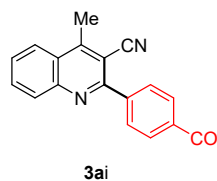

Flash chromatography (Silica Gel, PE/EtOAc) afforded **3ai** (0.039 g, 62%) as a white solid; m.p.: 148-149 °C;  $^1H$  NMR (400 MHz, Chloroform-*d*)  $\delta$  8.20-8.24 (m, 3H), 8.13 (d,  $J = 8.5$  Hz, 1H), 8.01 (d,  $J = 8.5$  Hz, 2H), 7.92 – 7.85 (m, 1H), 7.74 – 7.67 (m, 1H), 4.43 (q,  $J = 7.1$  Hz, 2H), 3.06 (s, 3H), 1.43 (t,  $J = 7.2$  Hz, 3H);  $^{13}C$  NMR (101 MHz, Chloroform-*d*)  $\delta$  166.5, 157.6, 153.4, 148.1, 142.5, 133.0, 131.8, 131.0, 130.1, 129.5, 128.5, 125.6, 124.7, 117.5, 106.5, 61.5, 18.2, 14.6; IR

(neat): 2904, 2210, 1714, 1514, 1272, 744; HRMS (ESI)  $m/z$ :  $[M+H]^+$  calculated for  $C_{20}H_{17}N_2O_2^+$  317.1285, found 317.1281.

### 2-(3-methoxyphenyl)-4-methylquinoline-3-carbonitrile (3aj)

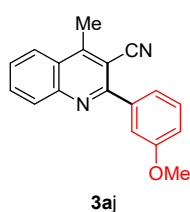

Flash chromatography (Silica Gel, PE/EtOAc) afforded **3aj** (0.035 g, 63%) as a white solid; m.p.: 129-130 °C;  $^1H$  NMR (400 MHz, Chloroform-*d*)  $\delta$  8.20 (d,  $J = 8.4$  Hz, 1H), 8.11 (d,  $J = 8.4$  Hz, 1H), 7.90 – 7.84 (m, 1H), 7.72 – 7.65 (m, 1H), 7.54 – 7.50 (m, 1H), 7.50 – 7.41 (m, 2H), 7.07 (ddd,  $J = 8.2, 2.6, 1.1$  Hz, 1H), 3.91 (s, 3H), 3.05 (s, 3H);  $^{13}C$  NMR (101 MHz, Chloroform-*d*)  $\delta$  159.5, 158.0, 152.7, 147.6, 139.3, 132.3, 130.4, 129.5, 127.7, 125.0, 124.1, 121.4, 117.2, 116.0, 114.0, 106.2, 55.3, 17.7; The spectroscopic data is in accordance with those reported in literature.<sup>9</sup>

### 4-Methyl-2-(3-nitrophenyl)quinoline-3-carbonitrile (3ak)

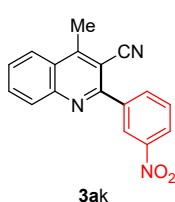

Flash chromatography (Silica Gel, PE/EtOAc) afforded **3ak** (0.036 g, 62%) as a white solid;  $^1H$  NMR (400 MHz, Chloroform-*d*)  $\delta$  8.87 – 8.83 (m, 1H), 8.46 – 8.35 (m, 1H), 8.32 (d,  $J = 7.7$  Hz, 1H), 8.21 (d,  $J = 8.4$  Hz, 1H), 8.15 (d,  $J = 8.4$  Hz, 1H), 7.96 – 7.89 (m, 1H), 7.79 – 7.71 (m, 2H), 3.08 (s, 3H); The spectroscopic data is in accordance with those reported in literature.<sup>9</sup>

### Methyl 3-(3-cyano-4-methylquinolin-2-yl)benzoate (3al)

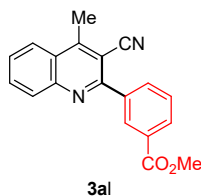

Flash chromatography (Silica Gel, PE/EtOAc) afforded **3al** (0.040 g, 66%) as a white solid; m.p.: 174-175 °C;  $^1H$  NMR (400 MHz, Chloroform-*d*)  $\delta$  8.62 (s, 1H), 8.26 – 8.17 (m, 2H), 8.17 – 8.09 (m, 2H), 7.92 – 7.85 (m, 1H), 7.76 – 7.67 (m, 1H), 7.67 – 7.61 (m, 1H), 3.96 (s, 3H), 3.05 (s, 3H);  $^{13}C$  NMR (101 MHz, Chloroform-*d*)  $\delta$  166.7, 157.4, 153.2, 147.9, 138.7, 133.5, 132.7, 131.0, 130.8, 130.7, 130.6, 128.9, 128.2, 125.4, 124.5, 117.3, 106.3, 52.5, 18.0; IR (neat): 2898, 2216, 1718, 1570, 1276, 752; HRMS (ESI)  $m/z$ :  $[M+H]^+$  calculated for  $C_{19}H_{15}N_2O_2^+$  303.1128, found 303.1131.

### 4-Methyl-2-(*o*-tolyl)quinoline-3-carbonitrile (3am)

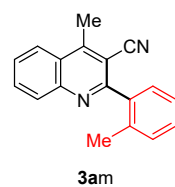

Flash chromatography (Silica Gel, PE/EtOAc) afforded **3am** (0.021 g, 40%) as a white solid; m.p.: 147-148 °C;  $^1H$  NMR (400 MHz, Chloroform-*d*)  $\delta$  8.18 (d,  $J = 8.4$  Hz, 1H), 8.13 (d,  $J = 8.4$  Hz, 1H), 7.92 – 7.84 (m, 1H), 7.71 (dd,  $J = 8.5, 7.1$  Hz, 1H), 7.44 – 7.37 (m, 2H), 7.32-7.37 (m, 2H), 3.04 (s, 3H), 2.29 (s, 3H);  $^{13}C$  NMR (101 MHz, Chloroform-*d*)  $\delta$  160.1, 152.1, 147.7, 138.3, 136.1, 132.5, 130.9, 130.7, 129.6, 129.2, 128.0, 126.1, 125.3, 124.5, 116.8, 108.3, 19.8, 17.8; IR (neat): 2914, 2220, 1589, 1344, 721; HRMS (ESI)  $m/z$ :  $[M+H]^+$  calculated for  $C_{18}H_{15}N_2^+$  259.1230, found 259.1230.

### 2-(2-Methoxyphenyl)-4-methylquinoline-3-carbonitrile (3an)

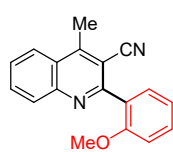

3an

Flash chromatography (Silica Gel, PE/EtOAc) afforded **3an** (0.035 g, 64%) as a white solid; m.p.: 219-220 °C; <sup>1</sup>H NMR (400 MHz, Chloroform-*d*) δ 8.19 (d, *J* = 9.2 Hz, 1H), 8.10 (d, *J* = 8.5 Hz, 1H), 7.88 – 7.80 (m, 1H), 7.71 – 7.64 (m, 1H), 7.55 – 7.44 (m, 2H), 7.16 – 7.10 (m, 1H), 7.06 (d, *J* = 8.6 Hz, 1H), 3.88 (s, 3H), 3.01 (s, 3H). <sup>13</sup>C NMR (101 MHz, Chloroform-*d*) δ 157.8, 157.3, 151.3, 148.3, 132.3, 131.6, 131.0, 130.8, 128.2, 128.0, 125.6, 124.6, 121.4, 117.5, 111.6, 109.5, 55.7, 18.0; IR (neat): 2902, 2358, 1558, 1257, 752; HRMS (ESI) *m/z*: [M+H]<sup>+</sup> calculated for C<sub>18</sub>H<sub>15</sub>N<sub>2</sub>O<sup>+</sup> 275.1179, found 275.1182.

### 2-(2-Cyanophenyl)-4-methylquinoline-3-carbonitrile (3ao)

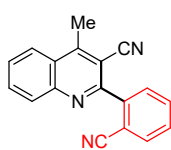

3ao

Flash chromatography (Silica Gel, PE/EtOAc) afforded **3ao** (0.038 g, 71%) as a white solid; m.p.: 212-213 °C; <sup>1</sup>H NMR (400 MHz, Chloroform-*d*) δ 8.23 (d, *J* = 7.3 Hz, 1H), 8.15 (d, *J* = 7.2 Hz, 1H), 7.96 – 7.86 (m, 2H), 7.86 – 7.71 (m, 3H), 7.68 – 7.60 (m, 1H), 3.07 (s, 3H); <sup>13</sup>C NMR (101 MHz, Chloroform-*d*) δ 155.6, 153.4, 147.7, 141.7, 134.2, 133.2, 132.9, 131.0, 130.5, 130.2, 129.0, 125.9, 124.7, 117.8, 116.7, 113.0, 107.1, 18.2; IR (neat): 2892, 2225, 1570, 1271, 779; HRMS (ESI) *m/z*: [M+H]<sup>+</sup> calculated for C<sub>18</sub>H<sub>12</sub>N<sub>3</sub><sup>+</sup> 270.1026, found 270.1030.

### 4-Methyl-2-(2-nitrophenyl)quinoline-3-carbonitrile (3ap)

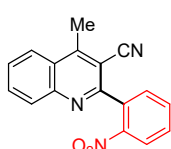

3ap

Flash chromatography (Silica Gel, PE/EtOAc) afforded **3ap** (0.036 g, 62%) as a white solid; m.p.: 200-201 °C; <sup>1</sup>H NMR (400 MHz, Chloroform-*d*) δ 8.27 (d, *J* = 8.2 Hz, 1H), 8.17 – 8.07 (m, 2H), 7.91 – 7.85 (m, *J* = 7.6 Hz, 1H), 7.85 – 7.78 (m, 1H), 7.77 – 7.68 (m, 2H), 7.65 (d, *J* = 7.6 Hz, 1H), 3.03 (s, 3H); <sup>13</sup>C NMR (101 MHz, Chloroform-*d*) δ 156.7, 152.1, 148.0, 147.6, 134.2, 133.9, 132.8, 131.8, 130.7, 130.6, 128.5, 125.6, 125.2, 124.6, 116.4, 107.4, 17.9; IR (neat): 2910, 2216, 1516, 1338, 750; HRMS (ESI) *m/z*: [M+H]<sup>+</sup> calculated for C<sub>17</sub>H<sub>12</sub>N<sub>3</sub>O<sub>2</sub><sup>+</sup> 290.0924, found 290.0921.

### 4-Methyl-2-(naphthalen-1-yl)quinoline-3-carbonitrile (3aq)

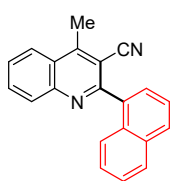

3aq

Flash chromatography (Silica Gel, PE/EtOAc) afforded **3aq** (0.031 g, 52%) as a white solid; m.p.: 136-137 °C; <sup>1</sup>H NMR (400 MHz, Chloroform-*d*) δ 8.23 (d, *J* = 8.4 Hz, 1H), 8.19 (d, *J* = 8.5 Hz, 1H), 8.02 (d, *J* = 8.1 Hz, 1H), 7.98 – 7.88 (m, 2H), 7.78 – 7.72 (m, 1H), 7.71 – 7.60 (m, 3H), 7.56 – 7.49 (m, 1H), 7.48 – 7.42 (m, 1H), 3.08 (s, 3H); <sup>13</sup>C NMR (101 MHz, Chloroform-*d*) δ 159.1, 152.4, 147.8, 135.9, 134.2, 132.7, 131.5, 130.8, 130.2, 128.7, 128.2, 127.8, 127.0, 126.4, 125.5, 125.2, 124.5, 116.8, 109.0, 17.9 (one carbon missing due to overlap); IR (neat): 2916, 2216, 1514, 1309, 727; HRMS (ESI) *m/z*: [M+H]<sup>+</sup> calculated for C<sub>21</sub>H<sub>15</sub>N<sub>2</sub><sup>+</sup> 295.1230, found 295.1231.

### 4-Methyl-2-(2-methylpyridin-4-yl)quinoline-3-carbonitrile (3ar)

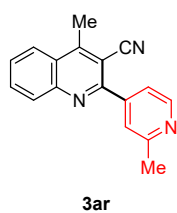

Flash chromatography (Silica Gel, PE/EtOAc) afforded **3ar** (0.034 g, 65%) as a white solid; m.p.: 178-179 °C; <sup>1</sup>H NMR (400 MHz, Chloroform-*d*) δ 8.70 (d, *J* = 5.1 Hz, 1H), 8.20 (d, *J* = 8.5 Hz, 1H), 8.14 (d, *J* = 8.4 Hz, 1H), 7.94 – 7.87 (m, 1H), 7.78 – 7.68 (m, 2H), 7.65 (d, *J* = 5.3 Hz, 1H), 3.06 (s, 3H), 2.70 (s, 3H); <sup>13</sup>C NMR (101 MHz, Chloroform-*d*) δ 159.2, 156.1, 153.4, 149.6, 147.8, 145.8, 132.9, 130.7, 128.6, 125.6, 124.5, 122.9, 120.5, 116.9, 106.0, 24.7, 17.9; IR (neat): 2912, 2214, 1525, 1446, 1309, 750; HRMS (ESI) *m/z*: [M+H]<sup>+</sup> calculated for C<sub>17</sub>H<sub>14</sub>N<sub>3</sub><sup>+</sup> 260.1182, found 260.1182.

#### 4-Methyl-2-(thiophen-2-yl)quinoline-3-carbonitrile (**3as**)

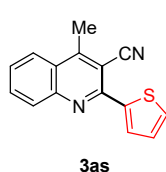

Flash chromatography (Silica Gel, PE/EtOAc) afforded **3as** (0.020 g, 40%) as a white solid; m.p.: 142-143 °C; <sup>1</sup>H NMR (400 MHz, Chloroform-*d*) δ 8.31 (d, *J* = 3.8 Hz, 1H), 8.09 (d, *J* = 9.1 Hz, 1H), 8.03 (d, *J* = 8.4 Hz, 1H), 7.85 – 7.78 (m, 1H), 7.65 – 7.58 (m, 1H), 7.56 (d, *J* = 5.1 Hz, 1H), 7.22 – 7.18 (m, 1H), 3.01 (s, 3H); <sup>13</sup>C NMR (101 MHz, Chloroform-*d*) δ 153.6, 150.7, 148.0, 142.9, 132.8, 130.6, 130.5, 129.4, 128.8, 127.8, 125.2, 124.6, 118.0, 103.8, 18.0; IR (neat): 2883, 2358, 1525, 1461, 1311, 719; HRMS (ESI) *m/z*: [M+H]<sup>+</sup> calculated for C<sub>15</sub>H<sub>11</sub>N<sub>2</sub>S<sup>+</sup> 251.0638, found 251.0649.

#### 4-Methyl-2-(2-methylprop-1-en-1-yl)quinoline-3-carbonitrile (**3at**)

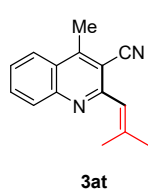

Flash chromatography (Silica Gel, PE/EtOAc) afforded **3at** (0.020 g, 46%) as a light-yellow oil; <sup>1</sup>H NMR (400 MHz, Chloroform-*d*) δ 8.07 (d, *J* = 8.4 Hz, 1H), 8.01 (d, *J* = 9.4 Hz, 1H), 7.82 – 7.75 (m, 1H), 7.63 – 7.54 (m, 1H), 7.25 (s, 1H), 6.75 (s, 1H), 2.94 (d, *J* = 2.6 Hz, 3H), 2.22 (s, 3H), 2.07 (s, 3H); <sup>13</sup>C NMR (151 MHz, Chloroform-*d*) δ 155.2, 150.2, 146.6, 146.4, 130.9, 129.1, 126.1, 123.4, 123.2, 120.5, 115.9, 106.5, 26.6, 19.4, 16.5; IR (neat): 2896, 2356, 1774, 1514, 1309, 727; HRMS (ESI) *m/z*: [M+H]<sup>+</sup> calculated for C<sub>15</sub>H<sub>15</sub>N<sub>2</sub><sup>+</sup> 223.1230, found 223.1225.

#### 4-Methyl-2-((3-methyl-2,3-dihydrobenzofuran-3-yl)methyl)quinoline-3-carbonitrile (**3ay**)

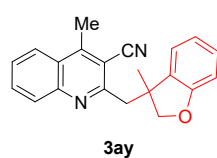

Flash chromatography (Silica Gel, PE/EtOAc) afforded **3ay** (0.034 g, 54%) as a yellow oil; <sup>1</sup>H NMR (400 MHz, Chloroform-*d*) δ 8.10 – 8.00 (m, 2H), 7.87 – 7.79 (m, 1H), 7.69 – 7.59 (m, 1H), 7.19 (d, *J* = 7.4 Hz, 1H), 7.14 (dd, *J* = 7.6, 7.6 Hz, 1H), 6.94 – 6.87 (m, 1H), 6.78 (d, *J* = 8.0 Hz, 1H), 5.09 (d, *J* = 9.0 Hz, 1H), 4.34 (d, *J* = 9.0 Hz, 1H), 3.64 (d, *J* = 14.5 Hz, 1H), 3.43 (d, *J* = 14.5 Hz, 1H), 2.92 (s, 3H), 1.48 (s, 3H); <sup>13</sup>C NMR (151 MHz, Chloroform-*d*) δ 159.3, 157.8, 151.3, 147.4, 134.6, 132.1, 130.1, 128.4, 127.4, 124.8, 124.2, 123.2, 120.5, 117.0, 109.7, 108.4, 82.2, 46.4, 46.2, 24.8, 17.5; IR (neat): 2920, 2218, 1548, 1307, 825, 752; HRMS (ESI) *m/z*: [M+H]<sup>+</sup> calculated for C<sub>21</sub>H<sub>19</sub>N<sub>2</sub>O<sup>+</sup> 315.1492, found 315.1490.

#### 4-(4-methyl-2-phenylquinolin-3-yl)benzonitrile (**3da**)

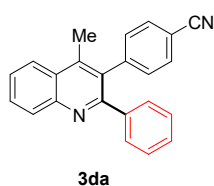

Flash chromatography (Silica Gel, PE/EtOAc) afforded **3da** (0.051 g, 79%) as a white solid; m.p.: 264-265 °C; <sup>1</sup>H NMR (400 MHz, Chloroform-*d*) δ 8.21 (dd, *J* = 8.5, 1.2 Hz, 1H), 8.10 (dd, *J* = 8.5, 1.3 Hz, 1H), 7.82 – 7.75 (m, 1H), 7.68 – 7.62 (m, 1H), 7.59 (d, *J* = 8.2 Hz, 2H), 7.26 – 7.20 (m, 7H), 2.53 (s, 3H); <sup>13</sup>C NMR (101 MHz, Chloroform-*d*) δ 158.1, 147.2, 144.4, 142.2, 140.7, 132.2, 131.8, 131.7, 130.5, 129.7, 129.6, 127.9, 126.9, 126.8, 124.1, 118.6, 111.1, 16.3 (one carbon missing due to overlap); IR (neat): 2914, 2220, 1506, 1309, 729; HRMS (ESI) *m/z*: [M+H]<sup>+</sup> calculated for C<sub>23</sub>H<sub>17</sub>N<sub>2</sub><sup>+</sup> 321.1386, found 321.1389.

#### 4-(4,7-Dimethyl-2-phenylquinolin-3-yl)benzonitrile (**3ea**)

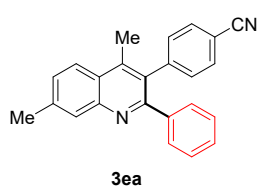

Flash chromatography (Silica Gel, PE/EtOAc) afforded **3ea** (0.036 g, 54%) as a colorless oil; <sup>1</sup>H NMR (400 MHz, Chloroform-*d*) δ 7.98 (d, *J* = 8.9 Hz, 2H), 7.58 (d, *J* = 8.0 Hz, 2H), 7.47 (dd, *J* = 8.6, 1.7 Hz, 1H), 7.26 – 7.18 (m, 7H), 2.60 (s, 3H), 2.50 (s, 3H); <sup>13</sup>C NMR (101 MHz, Chloroform-*d*) δ 158.1, 147.4, 144.6, 141.9, 140.8, 140.1, 131.8, 131.8, 131.4, 129.6, 129.4, 129.2, 127.83, 127.8, 124.8, 123.8, 118.7, 111.0, 21.7, 16.2; IR (neat): 2918, 2223, 1506, 1276, 702; HRMS (ESI) *m/z*: [M+H]<sup>+</sup> calculated for C<sub>24</sub>H<sub>19</sub>N<sub>2</sub><sup>+</sup> 335.1543, found 335.1536.

#### 7-methoxy-4-methyl-2-phenylquinoline-3-carbonitrile (**3fa**)

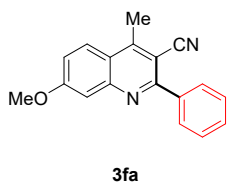

Flash chromatography (Silica Gel, PE/EtOAc) afforded **3fa** (0.029 g, 52%) as a colorless oil. <sup>1</sup>H NMR (400 MHz, Chloroform-*d*) δ 7.99 (d, *J* = 9.2 Hz, 1H), 7.91 (dd, *J* = 7.9, 1.7 Hz, 2H), 7.58 – 7.51 (m, 3H), 7.49 (d, *J* = 2.5 Hz, 1H), 7.30 (dd, *J* = 9.2, 2.6 Hz, 1H), 3.98 (s, 3H), 2.99 (s, 3H); <sup>13</sup>C NMR (101 MHz, Chloroform-*d*) δ 163.0, 159.3, 152.0, 150.2, 138.5, 129.8, 129.1, 128.5, 125.6, 120.9, 120.4, 117.7, 108.5, 104.2, 55.8, 17.6; IR (neat): 2887, 2356, 1514, 1311, 728; HRMS (ESI) *m/z*: [M+H]<sup>+</sup> calculated for C<sub>18</sub>H<sub>15</sub>N<sub>2</sub>O<sup>+</sup> 275.1179, found 275.1180.

#### 4-(7-Chloro-4-methyl-2-phenylquinolin-3-yl)benzonitrile (**3ga**)

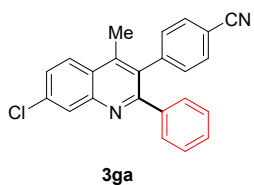

Flash chromatography (Silica Gel, PE/EtOAc) afforded **3ga** (0.053 g, 79%) as a colorless oil; <sup>1</sup>H NMR (400 MHz, Chloroform-*d*) δ 8.24 (d, *J* = 2.1 Hz, 1H), 8.06 (d, *J* = 9.0 Hz, 1H), 7.66 – 7.59 (m, 3H), 7.25-7.31 (m, 7H), 2.55 (s, 3H); <sup>13</sup>C NMR (151 MHz, Chloroform-*d*) δ 159.1, 147.5, 143.8, 142.4, 140.1, 135.6, 132.3, 131.8, 131.5, 129.5, 129.1, 128.0, 127.9, 127.7, 125.5, 125.2, 118.5, 111.1, 16.3; IR (neat): 2883, 1512, 1311, 1101, 669; HRMS (ESI) *m/z*: [M+H]<sup>+</sup> calculated for C<sub>23</sub>H<sub>16</sub>ClN<sub>2</sub><sup>+</sup> 335.0997, found 335.1000.

### Methyl 3-(4-cyanophenyl)-4-methyl-2-phenylquinoline-7-carboxylate (**3ha**)

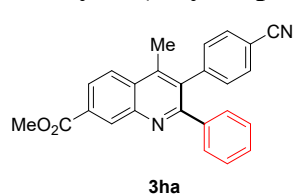

**3ha**

Flash chromatography (Silica Gel, PE/EtOAc) afforded **3ha** (0.039 g, 52%) as a white solid; m.p.: 151-152 °C; <sup>1</sup>H NMR (600 MHz, Chloroform-*d*) δ 8.92 (d, *J* = 1.4 Hz, 1H), 8.21 (dd, *J* = 8.7, 1.4 Hz, 1H), 8.13 (d, *J* = 8.7 Hz, 1H), 7.60 (d, *J* = 8.1 Hz, 2H), 7.26 – 7.20 (m, 7H), 4.00 (s, 3H), 2.54 (s, 3H); <sup>13</sup>C NMR (151 MHz, Chloroform-*d*) δ 166.8, 159.2, 146.6, 144.0, 142.4, 140.3, 133.9, 133.0, 132.1, 131.6, 131.3, 129.7, 129.5, 128.3, 128.1, 126.5, 124.7, 118.7, 111.4, 52.6, 16.6; IR (neat): 2908, 1714, 1523, 1309, 678; HRMS (ESI) *m/z*: [M+H]<sup>+</sup> calculated for C<sub>25</sub>H<sub>19</sub>N<sub>2</sub>O<sub>2</sub><sup>+</sup> 379.1441, found 379.1442.

### 3-(4-cyanophenyl)-4-methyl-2-phenylquinoline-6-carbonitrile (**3ia**)

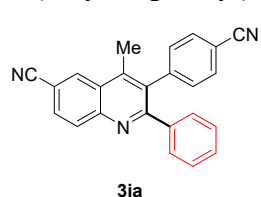

**3ia**

Flash chromatography (Silica Gel, PE/EtOAc) afforded **3ia** (0.049 g, 71%) as a white solid; m.p.: 149-150 °C; <sup>1</sup>H NMR (400 MHz, Chloroform-*d*) δ 8.50 (d, *J* = 1.7 Hz, 1H), 8.28 (d, *J* = 8.7 Hz, 1H), 7.92 (dd, *J* = 8.7, 1.8 Hz, 1H), 7.62 (d, *J* = 8.3 Hz, 2H), 7.28 – 7.22 (m, 7H), 2.56 (s, 3H); <sup>13</sup>C NMR (101 MHz, Chloroform-*d*) δ 161.2, 148.3, 143.5, 143.2, 133.9, 132.2, 131.9, 131.6, 131.0, 130.6, 129.7, 128.7, 128.2, 119.0, 118.6, 111.8, 110.6, 16.6 (two carbon missing due to overlap); IR (neat): 2908, 2223, 1514, 1309, 736; HRMS (ESI) *m/z*: [M+H]<sup>+</sup> calculated for C<sub>24</sub>H<sub>16</sub>N<sub>3</sub><sup>+</sup> 346.1339, found 346.1340.

### 4-(4-Butyl-2-phenylquinolin-3-yl)benzonitrile (**3ja**)

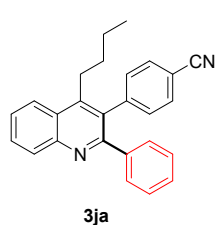

**3ja**

Flash chromatography (Silica Gel, PE/EtOAc) afforded **3ja** (0.035 g, 49%) as a colorless oil; <sup>1</sup>H NMR (400 MHz, Chloroform-*d*) δ 8.22 (d, *J* = 8.4 Hz, 1H), 8.10 (d, *J* = 8.5 Hz, 1H), 7.81 – 7.73 (m, 1H), 7.67 – 7.61 (m, 1H), 7.60 – 7.56 (m, 2H), 7.31 – 7.26 (m, 2H), 7.25 – 7.17 (m, 5H), 2.96 – 2.84 (m, 2H), 1.66 – 1.49 (m, 3H), 1.36 – 1.28 (m, 3H), 0.85 – 0.78 (m, 3H); <sup>13</sup>C NMR (101 MHz, Chloroform-*d*) δ 158.2, 147.7, 147.0, 144.3, 140.8, 131.8, 131.7, 131.6, 130.6, 129.62, 129.59, 127.83, 127.80, 126.9, 125.9, 124.1, 118.6, 111.4, 33.0, 29.2, 23.0, 13.6; IR (neat): 2866, 2223, 1506, 730; HRMS (ESI) *m/z*: [M+H]<sup>+</sup> calculated for C<sub>26</sub>H<sub>23</sub>N<sub>2</sub><sup>+</sup> 363.1856, found 363.1865.

### 2,4-Diphenylquinoline-3-carbonitrile (**3ka**)

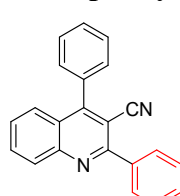

**3ka**

Flash chromatography (Silica Gel, PE/EtOAc) afforded **3ka** (0.038 g, 63%) as a white solid; <sup>1</sup>H NMR (600 MHz, Chloroform-*d*) δ 8.26 (d, *J* = 8.4 Hz, 1H), 8.00 (dd, *J* = 8.0, 1.3 Hz, 2H), 7.90 – 7.85 (m, 1H), 7.70 (d, *J* = 8.4 Hz, 1H), 7.64 – 7.59 (m, 3H), 7.59 – 7.52 (m, 6H). <sup>13</sup>C NMR (151 MHz, Chloroform-*d*) δ 158.7, 156.6, 148.7, 138.3, 134.8, 132.7, 130.3, 130.1, 129.9, 129.6, 129.5, 129.0, 128.8, 128.0, 127.0, 124.9, 117.4, 105.8; HRMS (ESI) *m/z*: [M+H]<sup>+</sup> calculated for C<sub>22</sub>H<sub>15</sub>N<sub>2</sub><sup>+</sup> 307.1230, found 307.1222.

## 4.2 from vinyl triflates



To a 20 mL vial was added Pd(PPh<sub>3</sub>)<sub>4</sub> (0.0236 g, 0.02 mmol, 0.1 equiv.), Cs<sub>2</sub>CO<sub>3</sub> (0.0391 g, 0.12 mmol, 0.6 equiv.) TMCA (2,2,3,3-tetramethylcyclopropane carboxylic acid) (0.0341 g, 0.24 mmol, 1.2 equiv.) and a solution of vinyl triflate (0.3 mmol, 1.5 equiv.) in toluene (1 mL) under argon. The resulting mixture was heated at 60 °C heating block for 30 min. Then a solution of isocyanide (0.2 mmol, 1.0 equiv.) in toluene (1 mL) was added to the reaction mixture dropwise over 3 h using a syringe pump. After further 1 h, the completed reaction was diluted with DCM (20 mL) and washed with satd. NaHCO<sub>3</sub> (20 mL x 2). The combined aqueous phase was back extracted with DCM (15 mL x 2). The combined organic phase was dried (anhydrous Na<sub>2</sub>SO<sub>4</sub>) and concentrated. The residue was purified by column chromatography (Silica Gel, PE/EtOAc) to afford the quinoline product **3**.

### 2-(Cyclohex-1-en-1-yl)-4-methylquinoline-3-carbonitrile (**3av**)

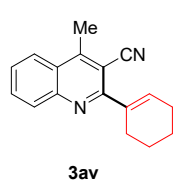

Flash chromatography (Silica Gel, PE/EtOAc) afforded **3av** (0.026 g, 53%) as a light-yellow oil; <sup>1</sup>H NMR (400 MHz, Chloroform-*d*) δ 8.09 (d, *J* = 8.4 Hz, 1H), 8.03 (d, *J* = 8.5 Hz, 1H), 7.84 – 7.77 (m, 1H), 7.65 – 7.57 (m, 1H), 6.37 (tt, *J* = 3.9, 1.7 Hz, 1H), 2.97 (s, 3H), 2.66 – 2.59 (m, 2H), 2.36 – 2.29 (m, 2H), 1.84-1.88 (m, 2H), 1.82 – 1.72 (m, 2H); <sup>13</sup>C NMR (101 MHz, Chloroform-*d*) δ 160.8, 152.1, 147.3, 136.8, 132.8, 131.9, 130.1, 127.1, 124.9, 124.0, 117.3, 105.9, 27.3, 25.5, 22.4, 21.5, 17.5; IR (neat): 3039, 2931, 2223, 1554, 1444, 754; HRMS (ESI) *m/z*: [M+H]<sup>+</sup> calculated for C<sub>17</sub>H<sub>17</sub>N<sub>2</sub><sup>+</sup> 249.1386, found 249.1394.

### *tert*-butyl 4-(3-cyano-4-methylquinolin-2-yl)-3,6-dihydropyridine-1(2*H*)-carboxylate (**3aw**)

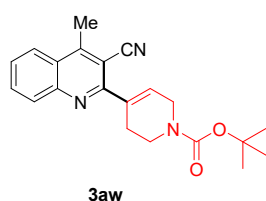

Flash chromatography (Silica Gel, PE/EtOAc) afforded **3aw** (0.032 g, 46%) as a yellow oil. <sup>1</sup>H NMR (400 MHz, Chloroform-*d*) δ 8.10 – 8.00 (m, 2H), 7.87 – 7.78 (m, 1H), 7.86 – 7.78 (m, 1H), 6.54 – 6.33 (m, 1H), 4.19 (s, 2H), 3.72 (s, 2H), 2.97 (s, 3H), 2.79 (s, 2H), 1.50 (s, 9H); <sup>13</sup>C NMR (151 MHz, Chloroform-*d*) δ 158.4, 154.7 (br), 152.6, 147.3, 135.4 (br), 132.3, 130.2, 128.9 (br), 127.6, 125.1, 124.2, 117.2, 105.4, 79.7, 43.2 (br), 40.1 (br), 28.40, 27.4 (br), 17.6; HRMS (ESI) *m/z*: [M+H]<sup>+</sup> calculated for C<sub>21</sub>H<sub>24</sub>N<sub>3</sub>O<sub>2</sub><sup>+</sup> 350.1863, found 350.1869.

### *tert*-butyl 3-(3-cyano-4-methylquinolin-2-yl)-8-azabicyclo[3.2.1]oct-2-ene-8-carboxylate (**3ax**)

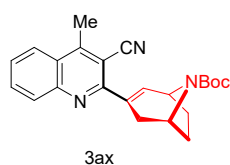

Flash chromatography (Silica Gel, PE/EtOAc) afforded **3ax** (0.033 g, 44% yield) as a yellow oil. <sup>1</sup>H NMR (400 MHz, Chloroform-*d*) δ 8.08 – 8.00 (m, 2H), 7.83 – 7.77 (m, 1H), 7.65 – 7.58 (m, 1H), 6.79 (s, 1H), 4.74 – 4.42 (m, 2H), 3.26-3.23 (m, 1H), 2.96 (s, 3H), 2.62 (d, *J* = 17.5 Hz, 1H), 2.26 (d, *J* = 10.6 Hz, 1H), 2.09 (s, 2H), 1.88 – 1.92 (m, 1H), 1.49 (s, 9H); <sup>13</sup>C NMR (101 MHz, Chloroform-*d*) δ

158.1, 154.2, 152.7, 147.6, 136.9, 134.2, 132.3, 130.6, 127.8, 125.3, 124.4, 117.5, 105.8, 79.8, 53.8, 52.1, 35.8, 34.8, 29.6, 28.6, 17.9; IR (neat): 2914, 2356, 2214, 1523, 1315, 746; HRMS (ESI) m/z: [M+H]<sup>+</sup> calculated for C<sub>23</sub>H<sub>26</sub>N<sub>3</sub>O<sub>2</sub><sup>+</sup> 376.2020, found 376.2024.

## 5. Scale up of 3aa

To a 100 mL RBF was added Pd(PPh<sub>3</sub>)<sub>4</sub> (0.118 g, 0.1 mmol, 0.1 equiv.), Cs<sub>2</sub>CO<sub>3</sub> (0.195 g, 0.6 mmol, 0.6 equiv.) TMCA (2,2,3,3-tetramethylcyclopropane carboxylic acid) (0.171 g, 1.2 mmol, 1.2 equiv.) and a solution of phenyl iodide (1.5 mmol, 1.5 equiv.) in toluene (5.0 mL) under argon. The resulting mixture was heated at 80 °C in an oil bath for 30 min. Then a solution of (*E*)-3-(2-isocyanophenyl)but-2-enitrile (1.0 mmol, 1.0 equiv.) in toluene (5 mL) was added to the reaction dropwise over 3 h using a syringe pump. After a further 1 h, the completed reaction was diluted with DCM (50 mL) and washed with satd. NaHCO<sub>3</sub> (50 mL x 2). The combined aqueous phase was back extracted with DCM (30 mL x 2). The combined organic phase was dried (anhydrous Na<sub>2</sub>SO<sub>4</sub>) and concentrated. The residue was purified by column chromatography (Silica Gel, PE/EtOAc) to afford the quinoline **3** (0.22 g, 90%).

## 6. References

1. Cheng, S.; Luo, Y.; Yu, T.; Li, J.; Gan, C.; Luo, S.; Zhu, Q. *ACS Catal.* **2022**, *12*, 837–845.
2. Drennhaus, T.; Leifert, D.; Lammert, J.; Drennhaus, J. P.; Bergander, K.; Daniliuc, C. G.; Studer, A. *J. Am. Chem. Soc.* **2023**, *145*, 8665–8676.
3. (a) Garanti, L.; Zecchi, G. *J. Org. Chem.* **1980**, *45*, 4767–4769, (b) Ames, D. E.; Bull, D. *Tetrahedron*, **1981**, *37*, 2489-91.
4. Yao, T.; Wang, B.; He, D.; Zhang, X.; Li, X.; Fang, R. *Org. Lett.* **2020**, *22*, 17, 6784–6789.
5. Wan, H.-L.; Guan, Z.; He, Y.-H. *Asian J. Org. Chem.* **2021**, *10*, 3406-3410.
6. Kim, H. R.; Yun, J. *Chem. Commun.*, **2011**, *47*, 2943-2945.
7. Kim, J. H.; Lee, S. A.; Jeon, T. S.; Cha, J. K.; Kim, Y. G. *Synlett*, **2023**, *34*, 1719-1722.
8. Peng, C.; Wang, Y.; Liu, L.; Wang, H.; Zhao, J.; Zhu, Q. *Eur. J. Org. Chem.* **2010**, 818-822.
9. Kumar, M.; Goswami, A. *Org. Lett.* **2023**, *25*, 3254-3259.

## 7. Copies of NMR Spectroscopies

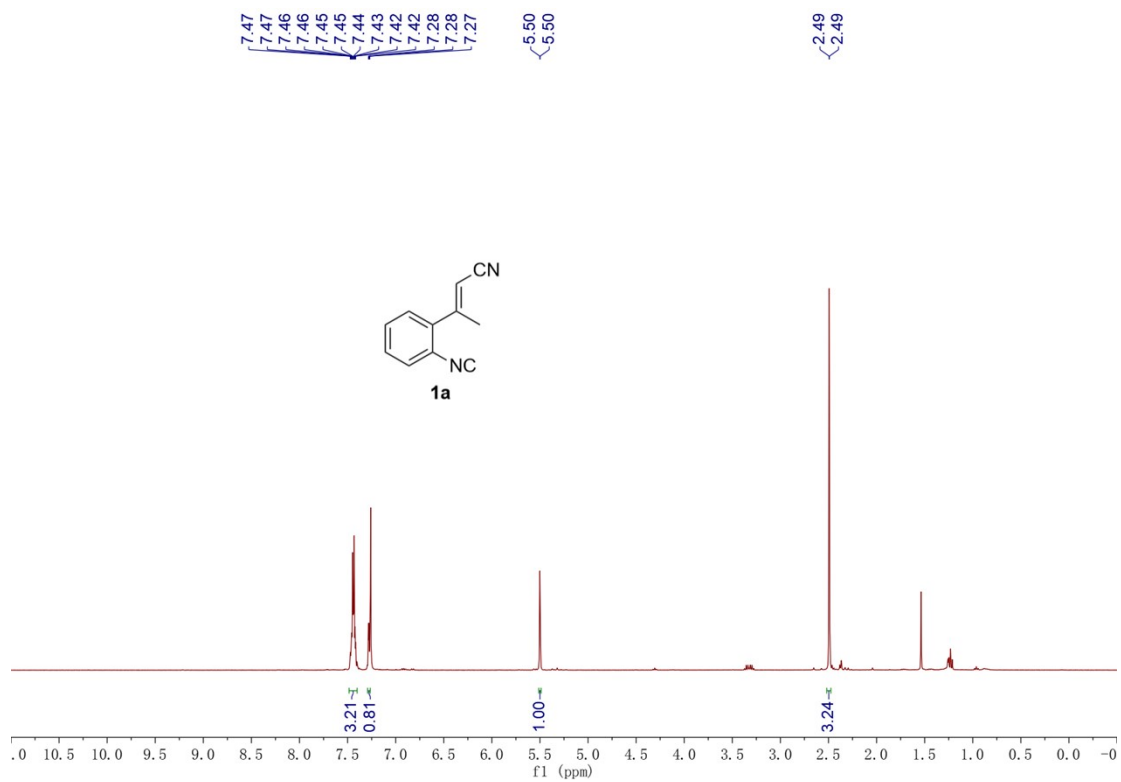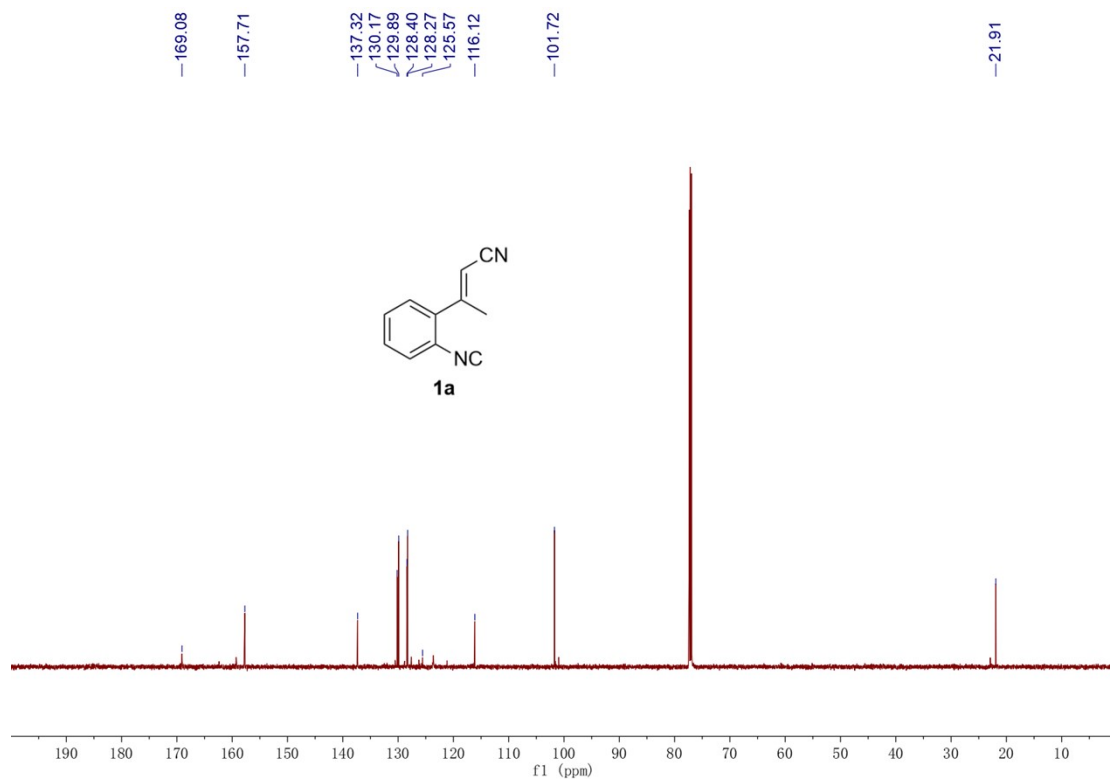

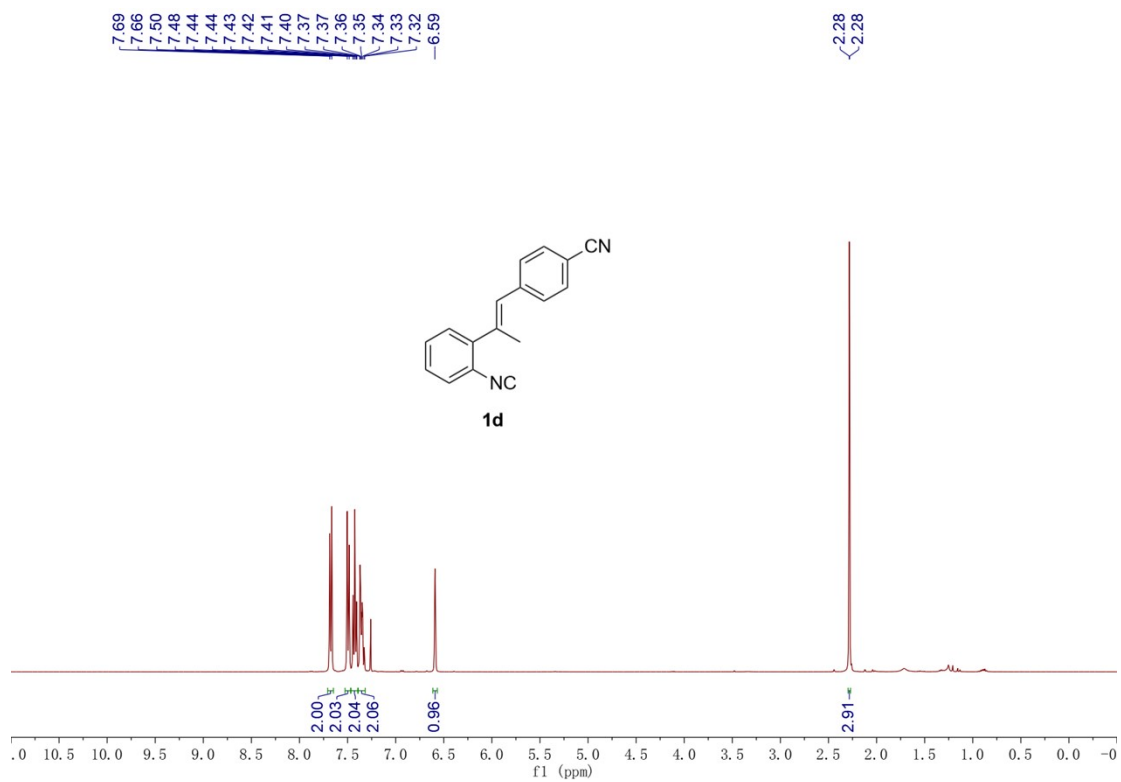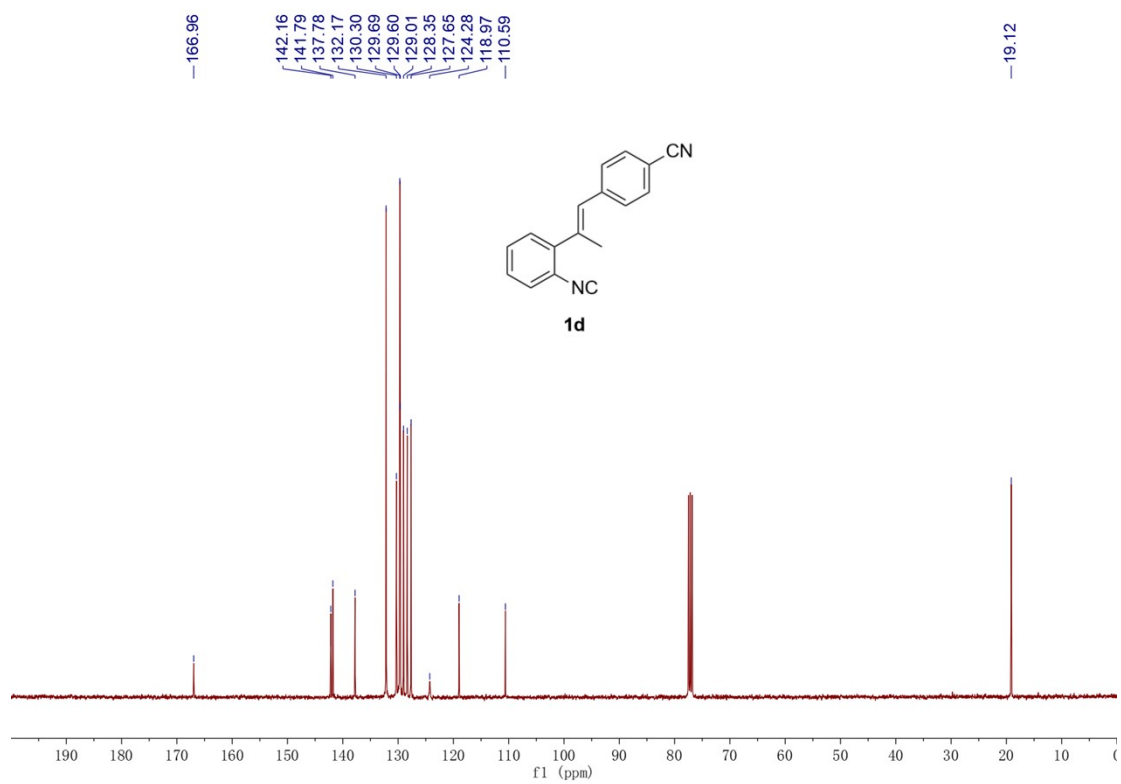

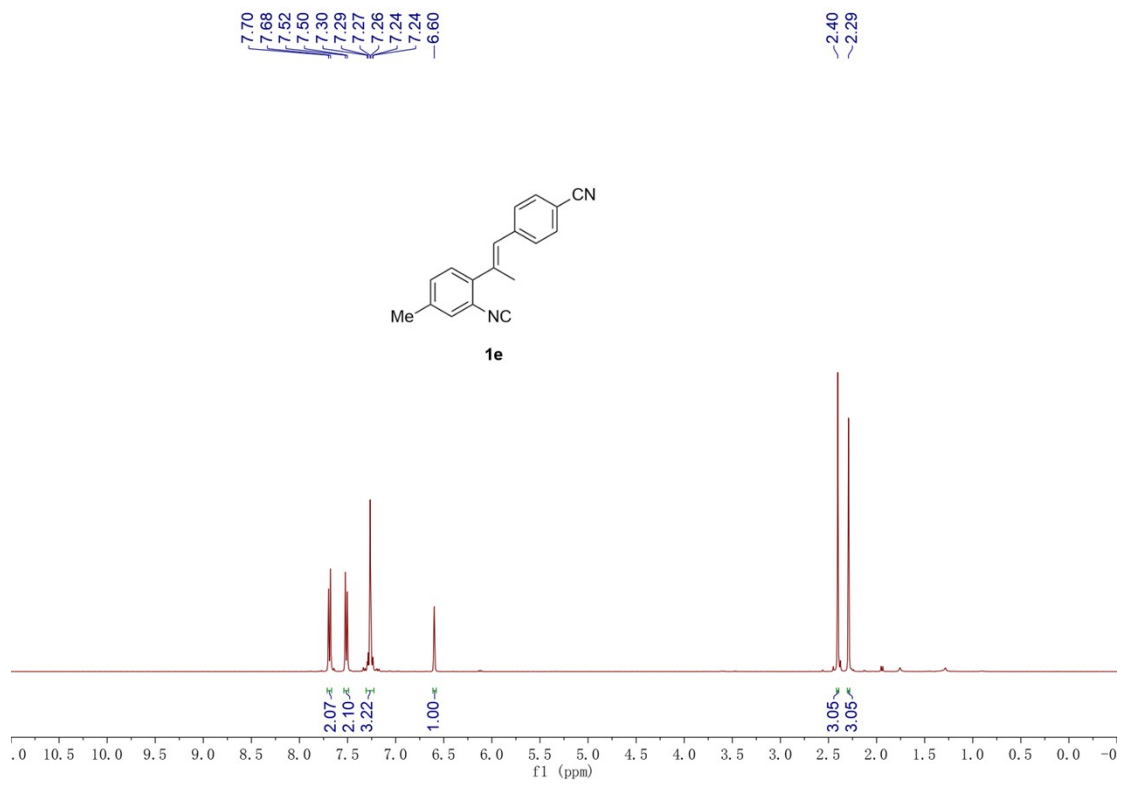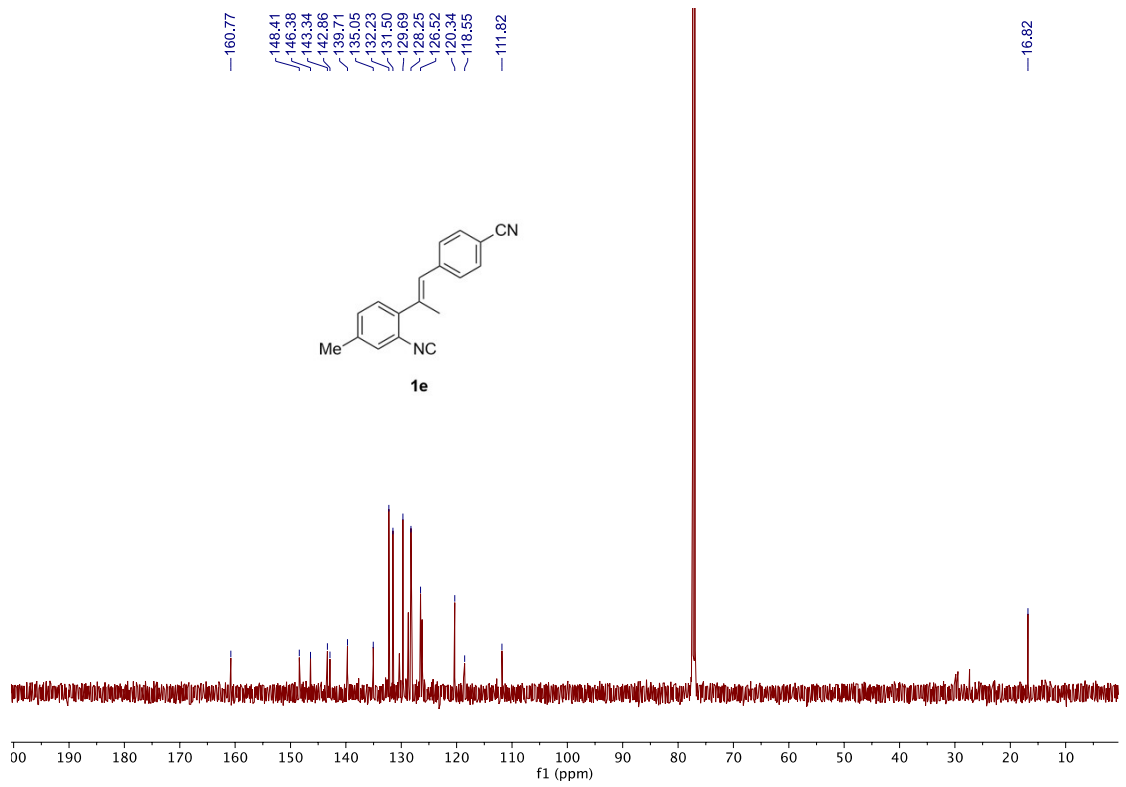

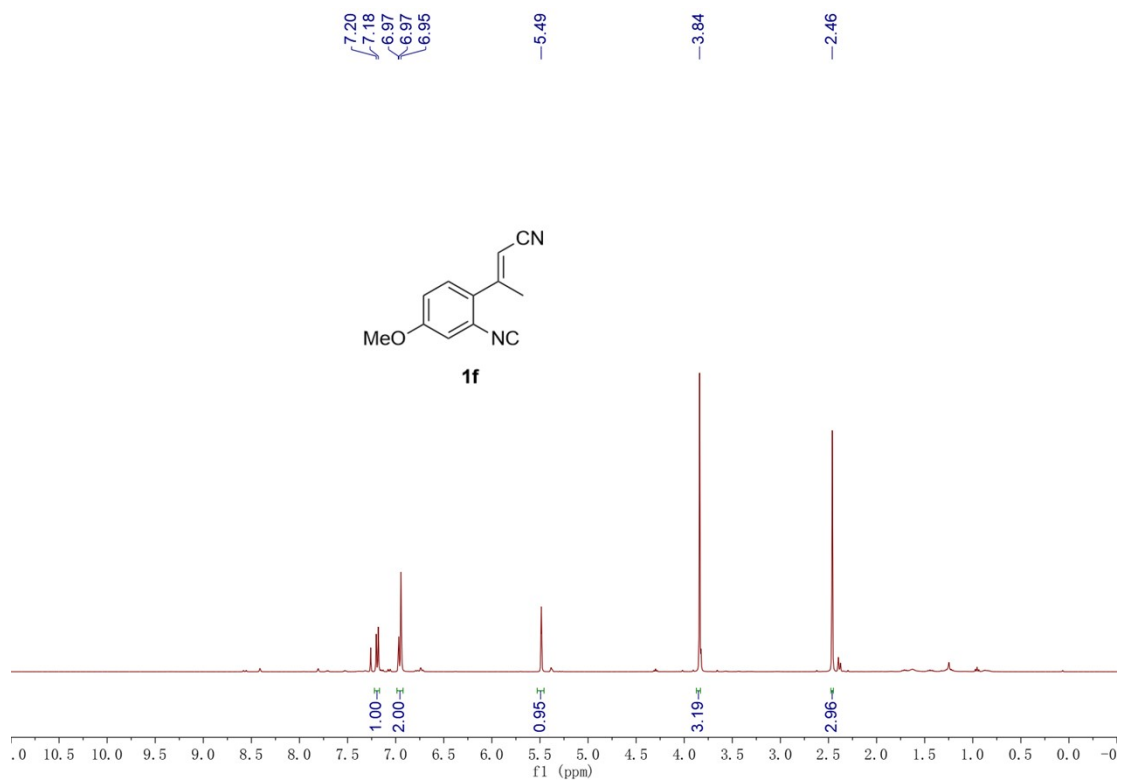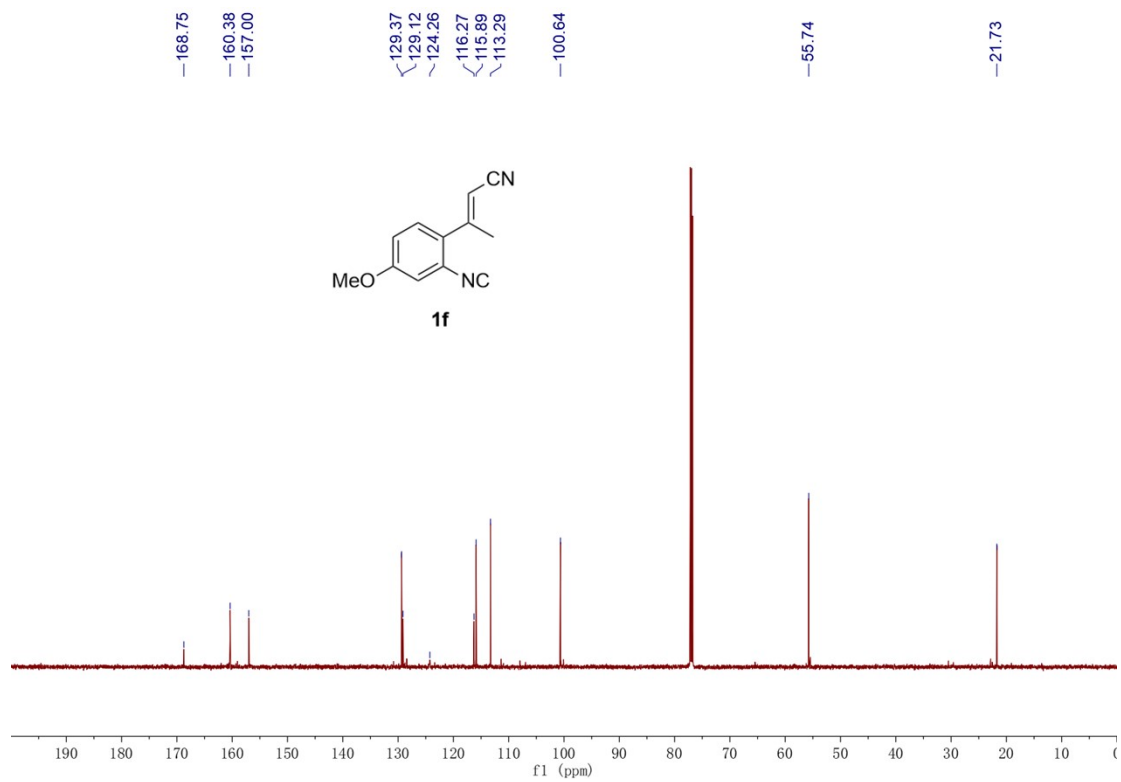

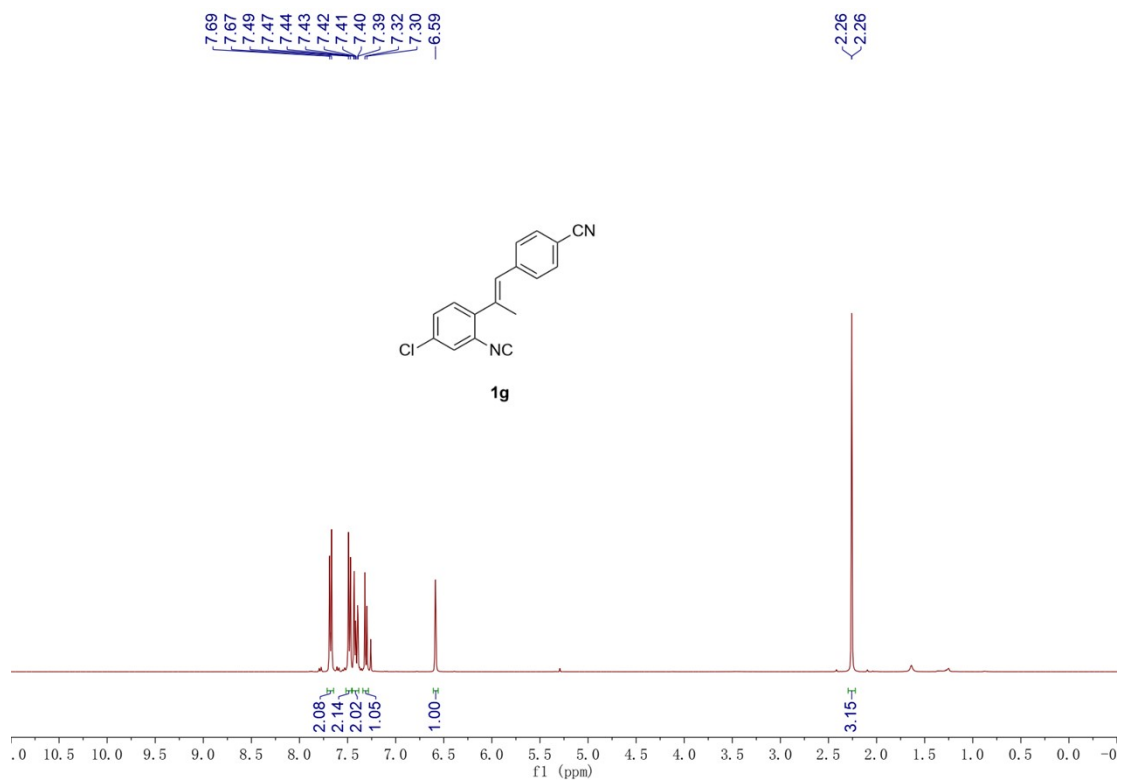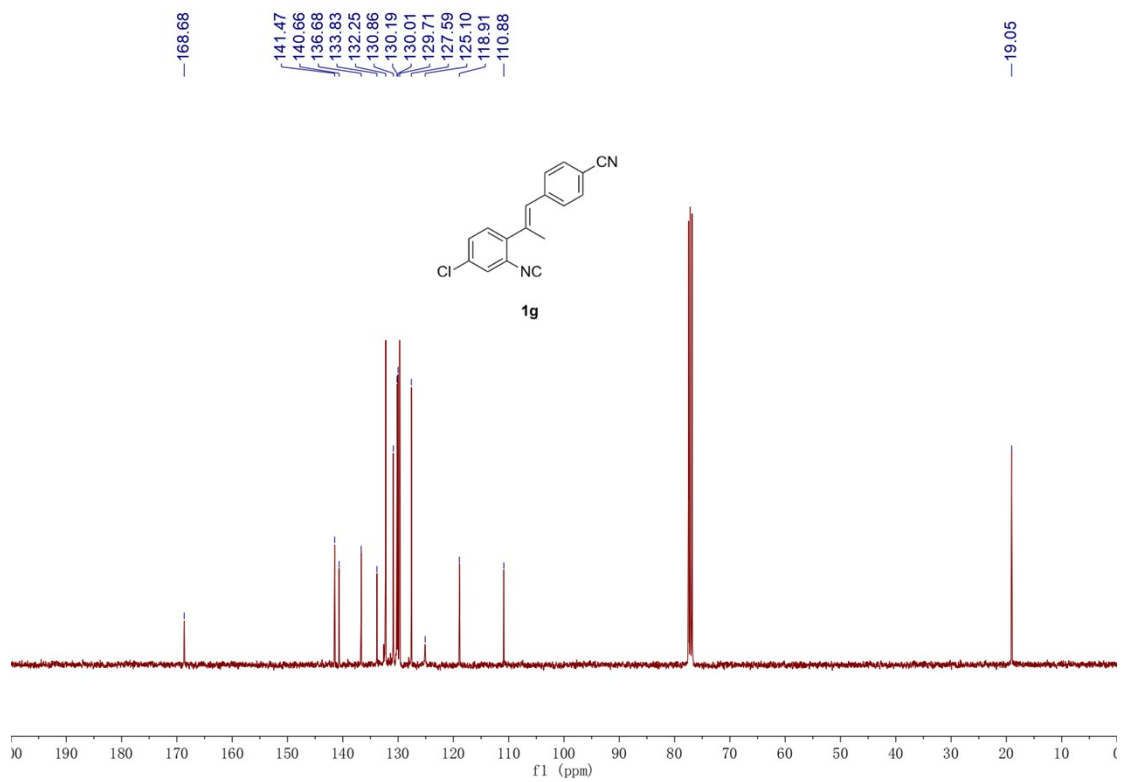

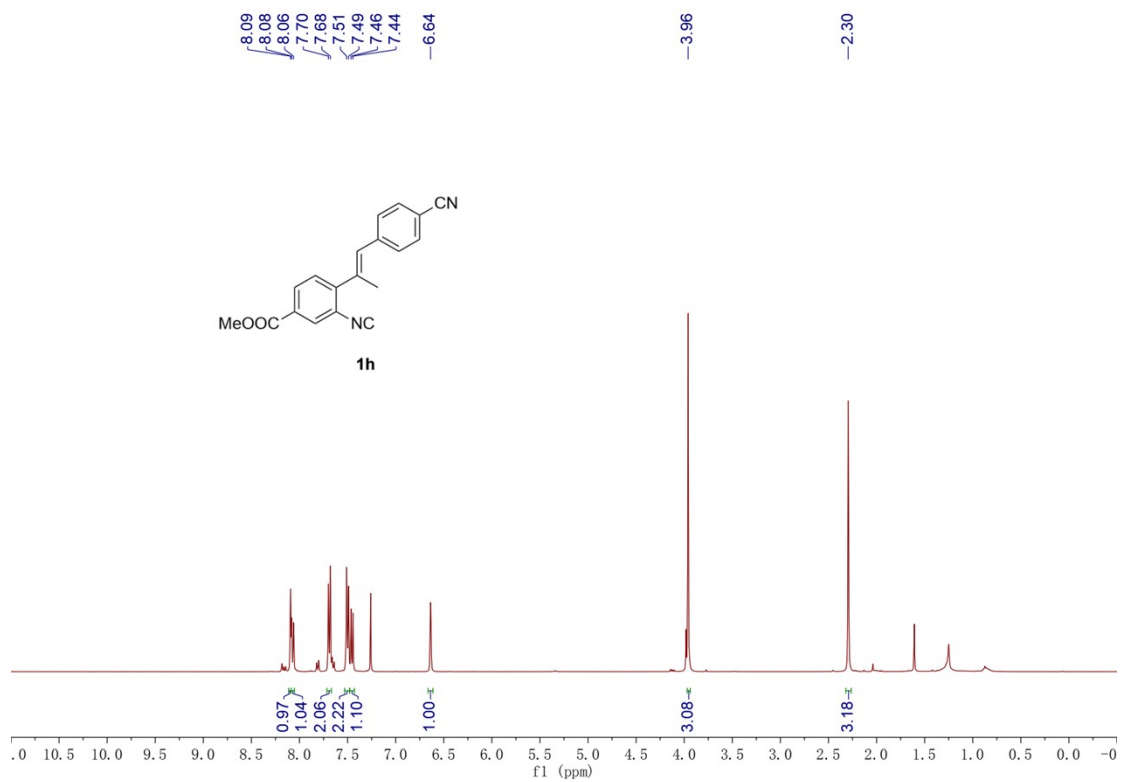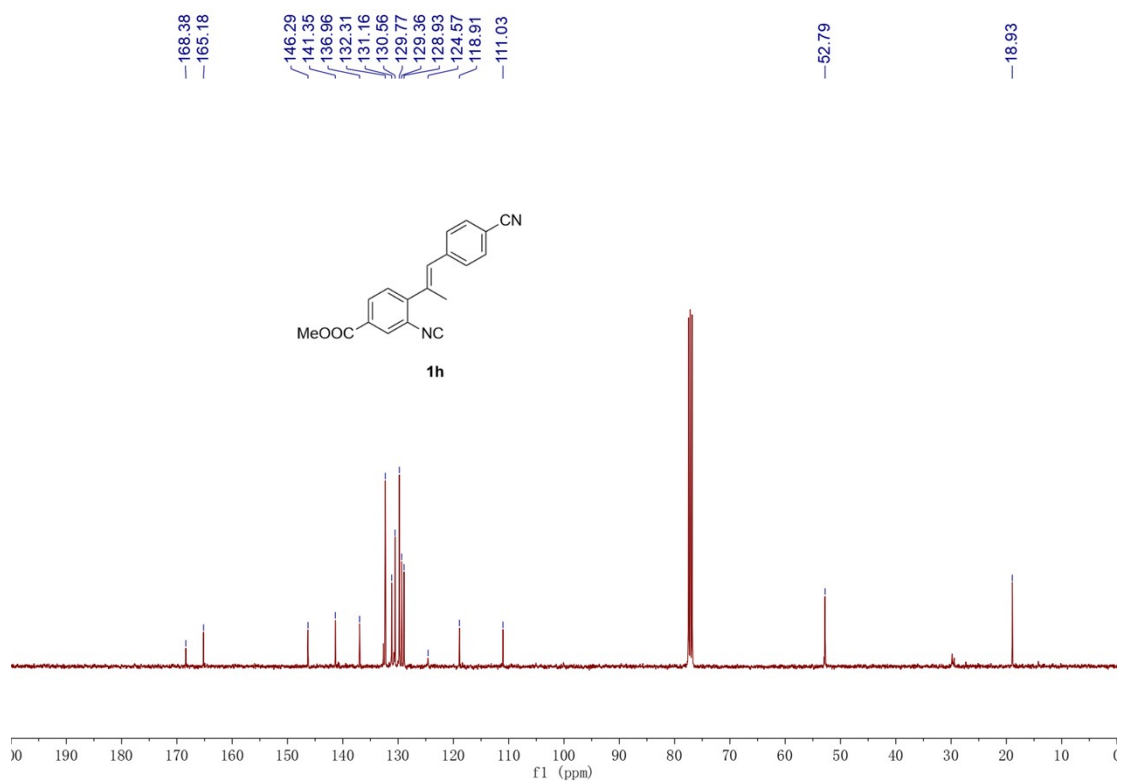



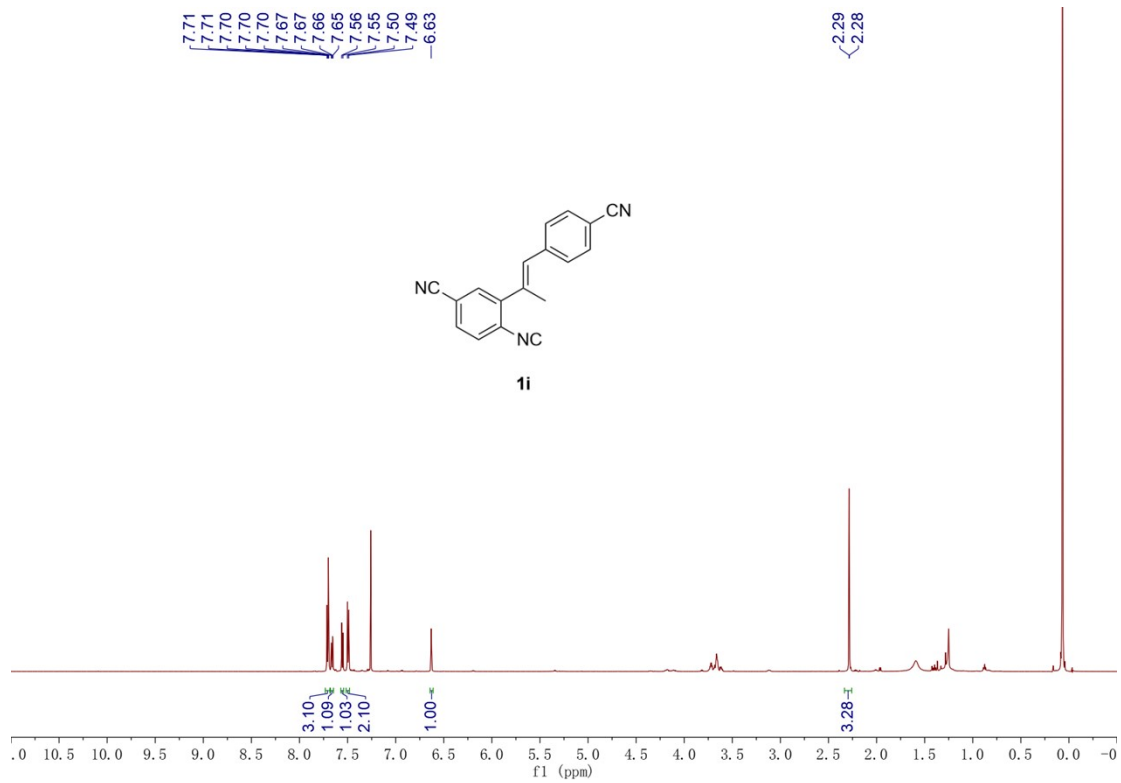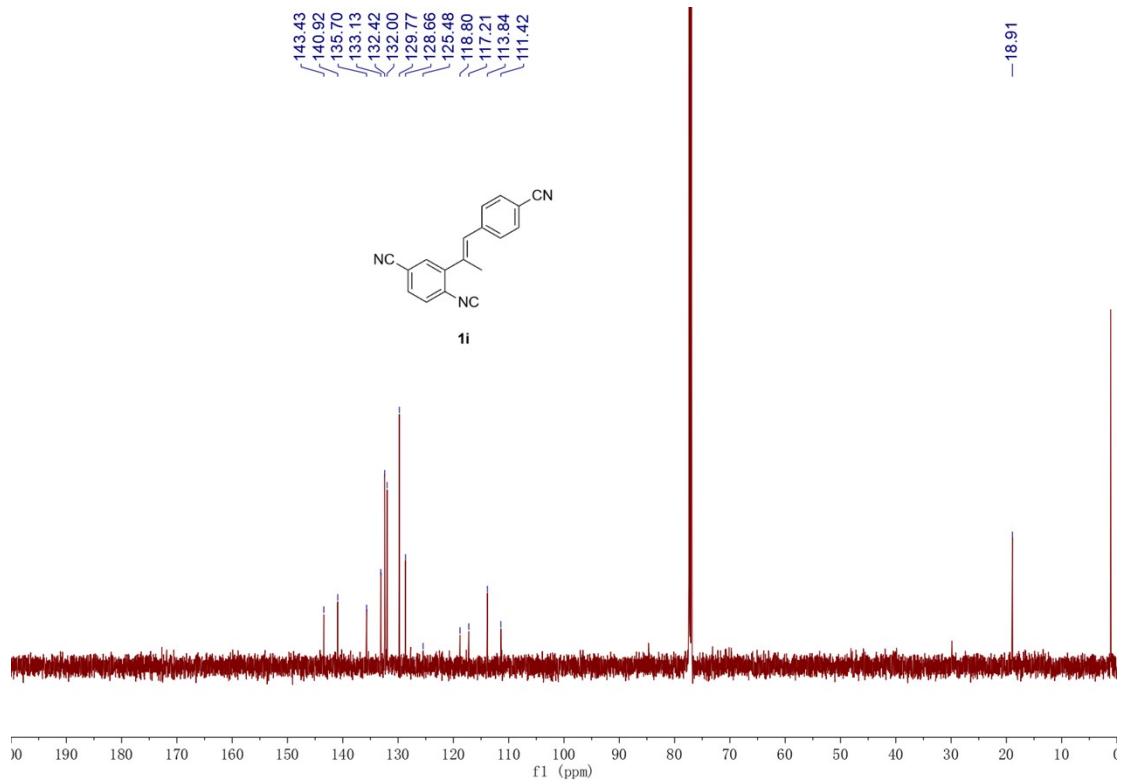

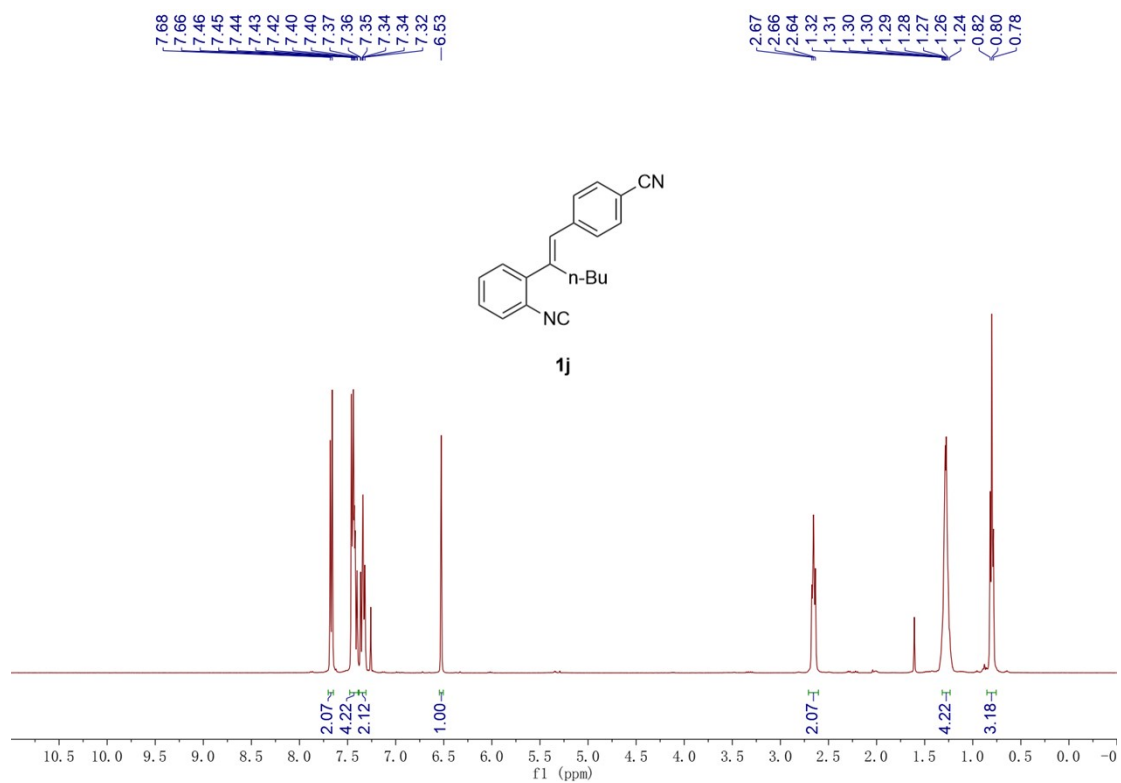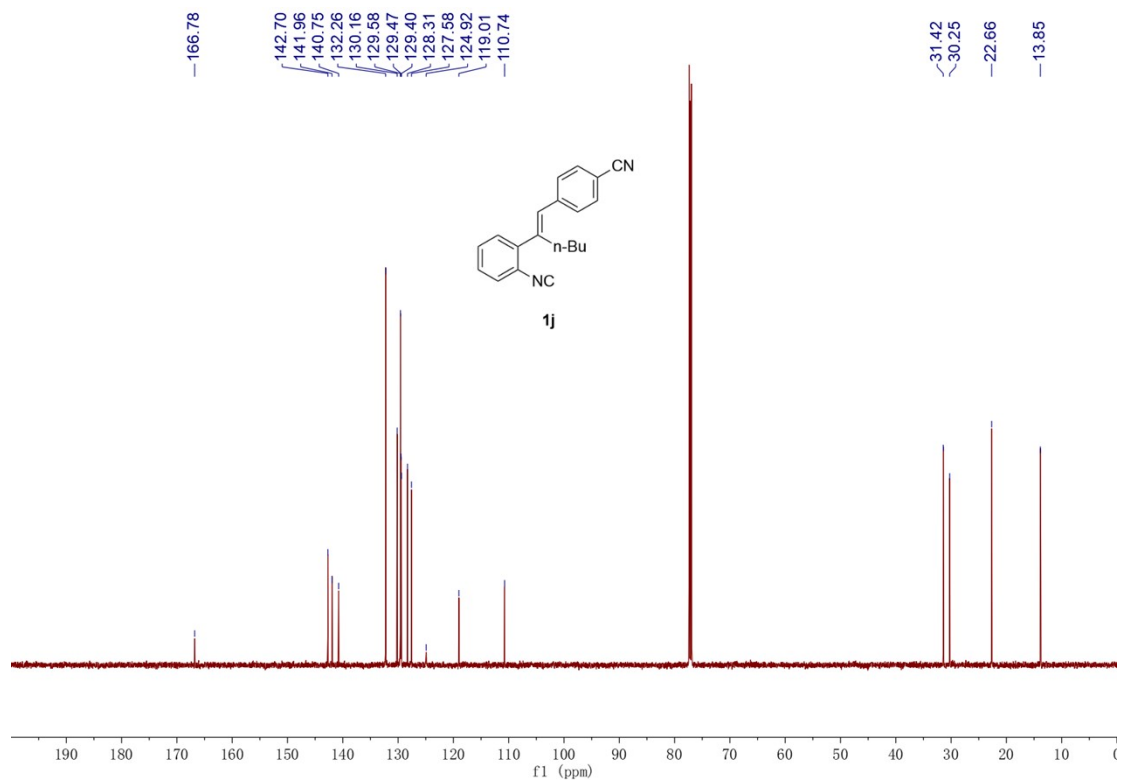

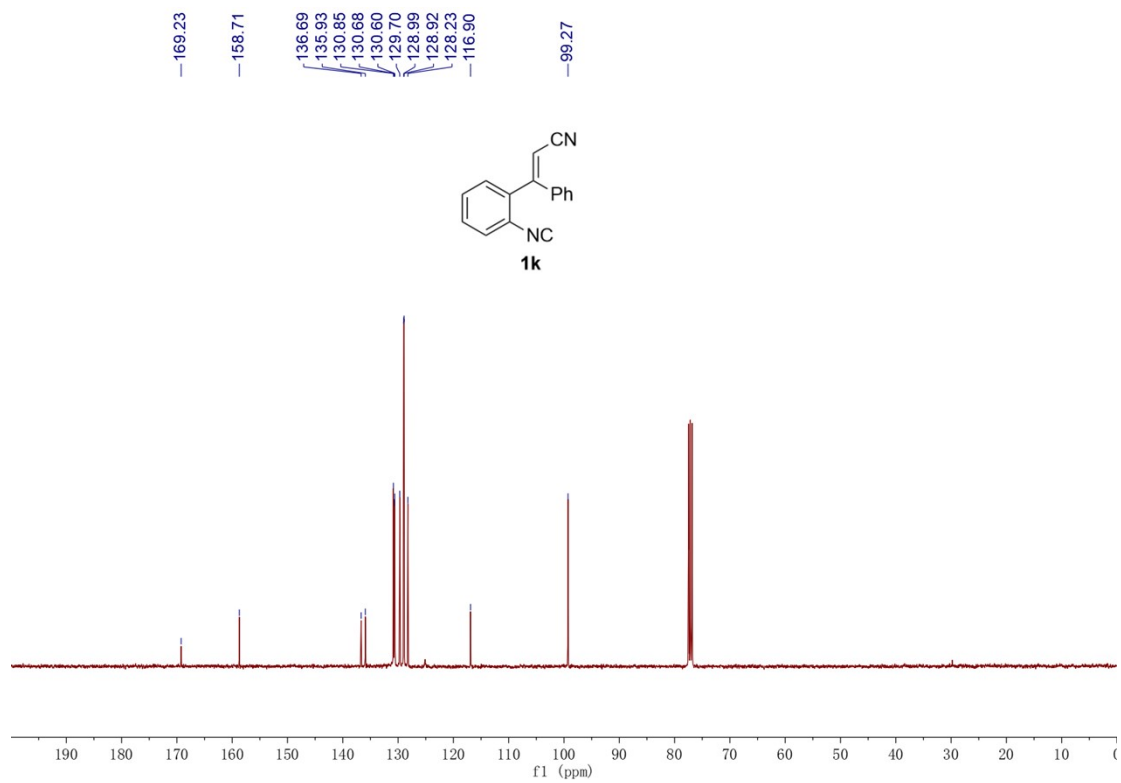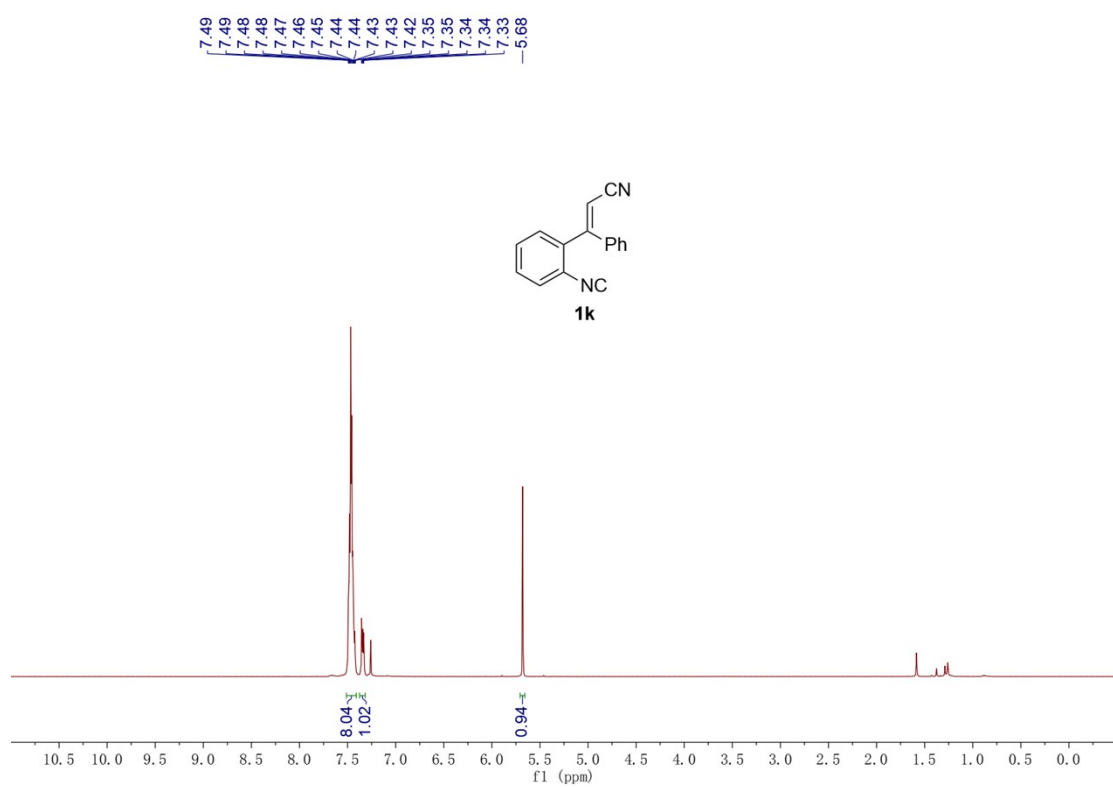

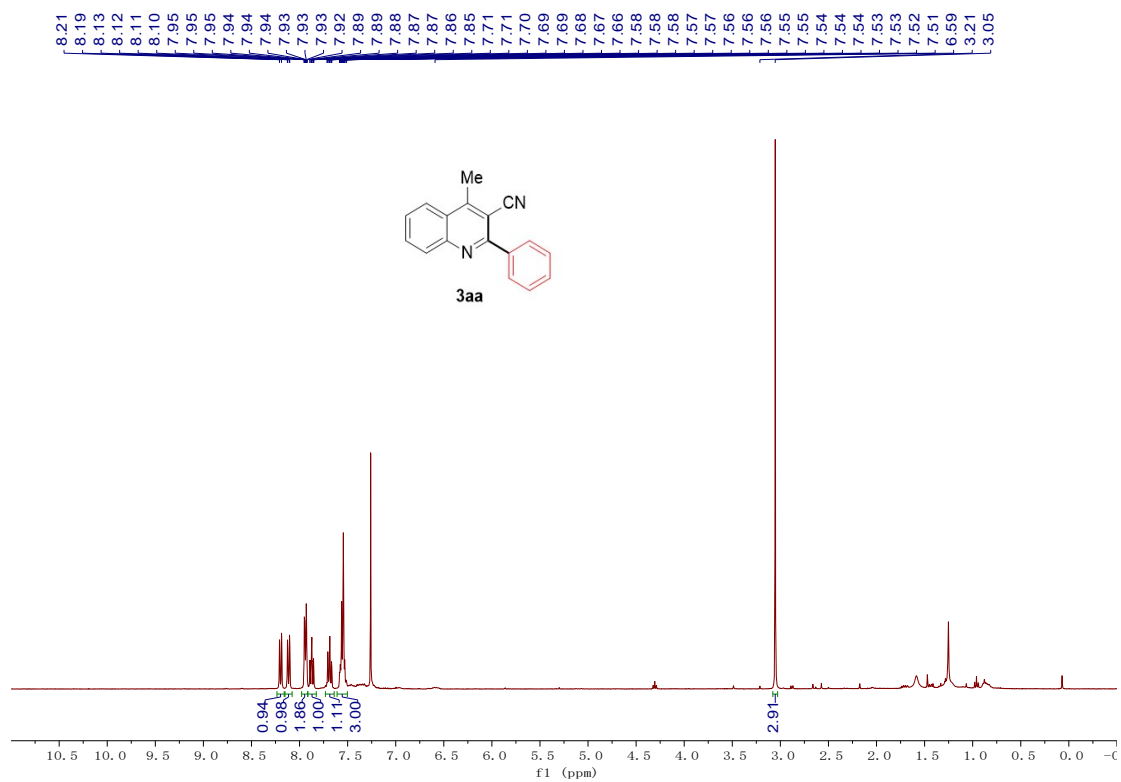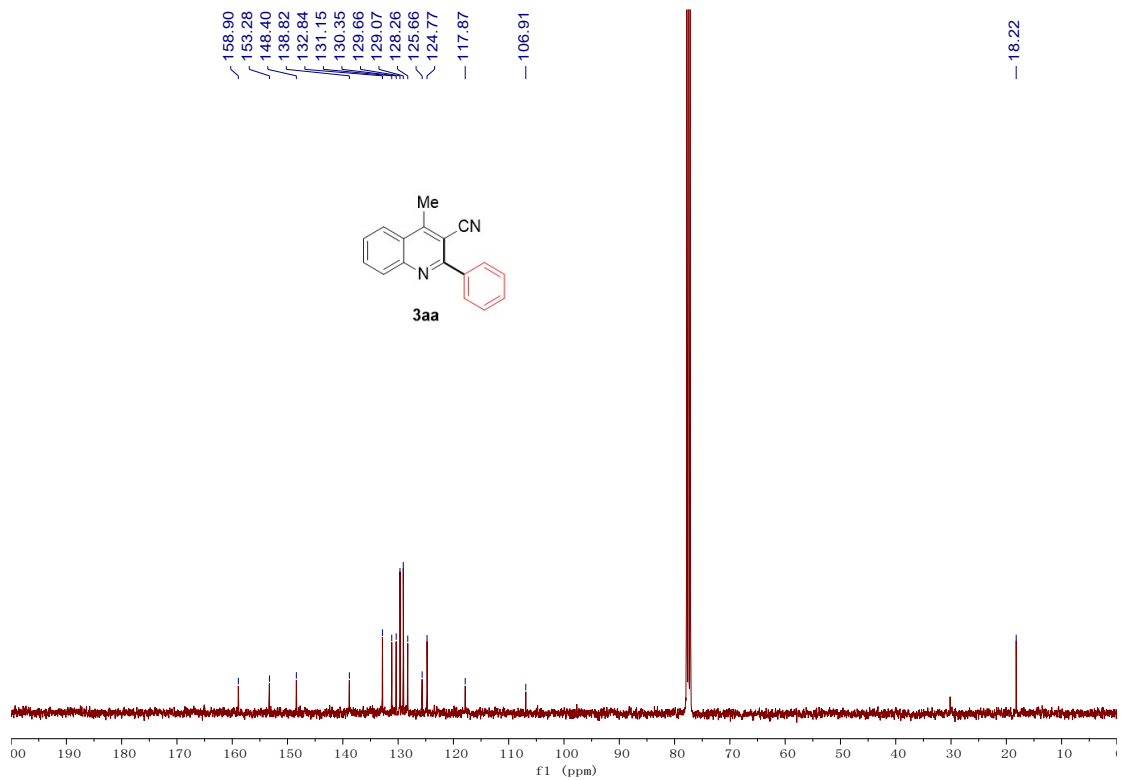

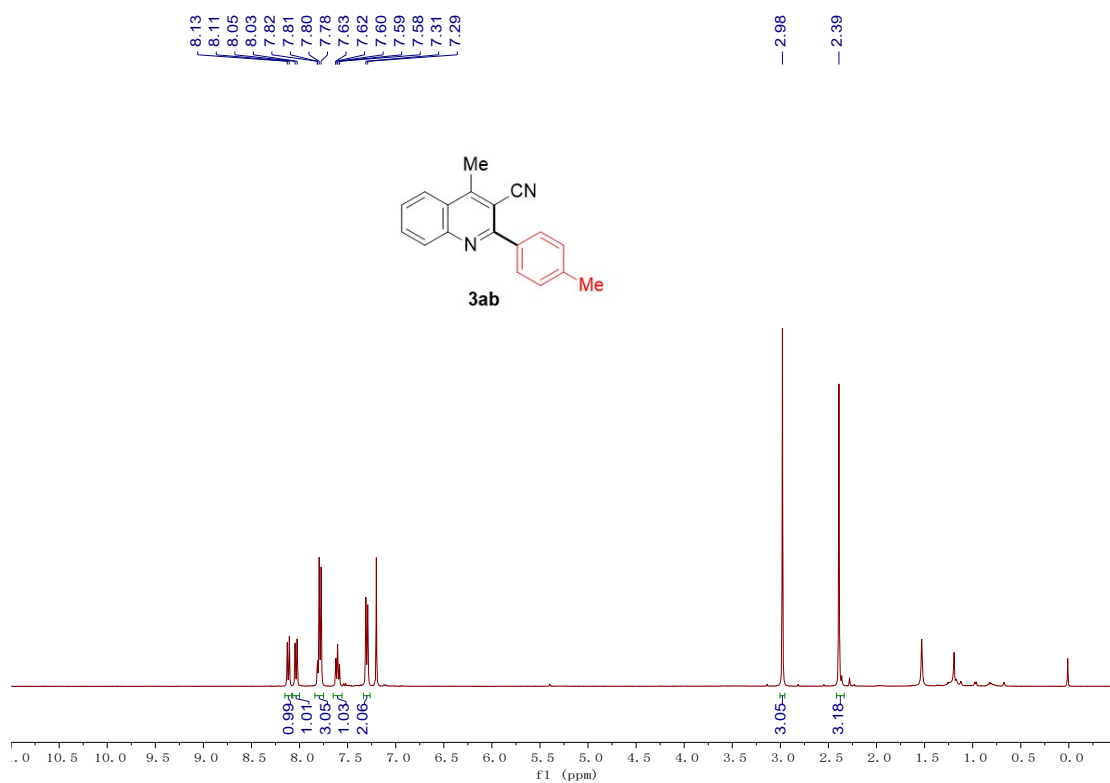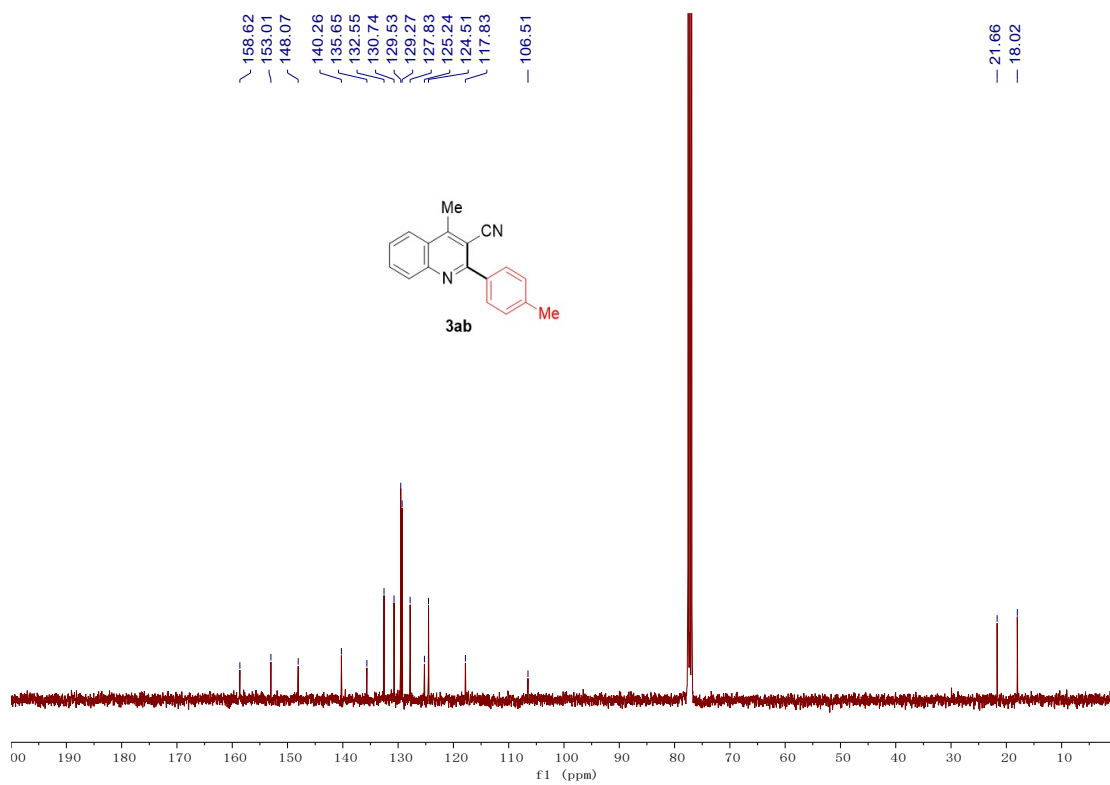

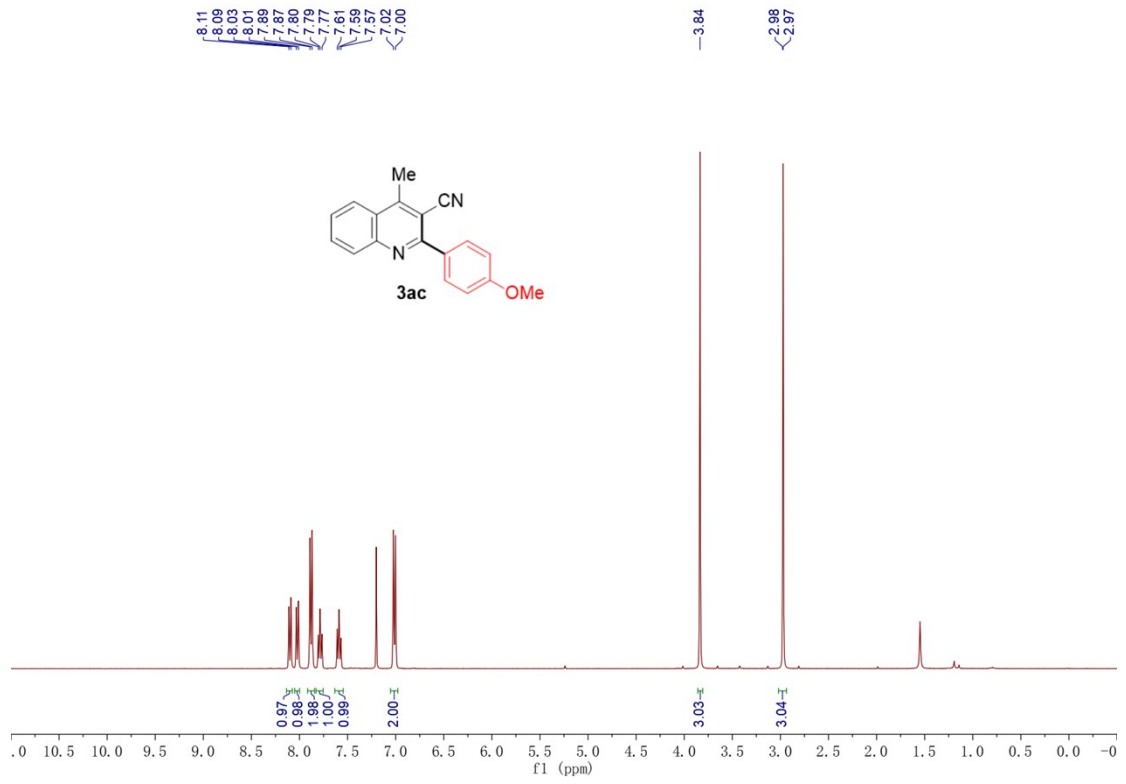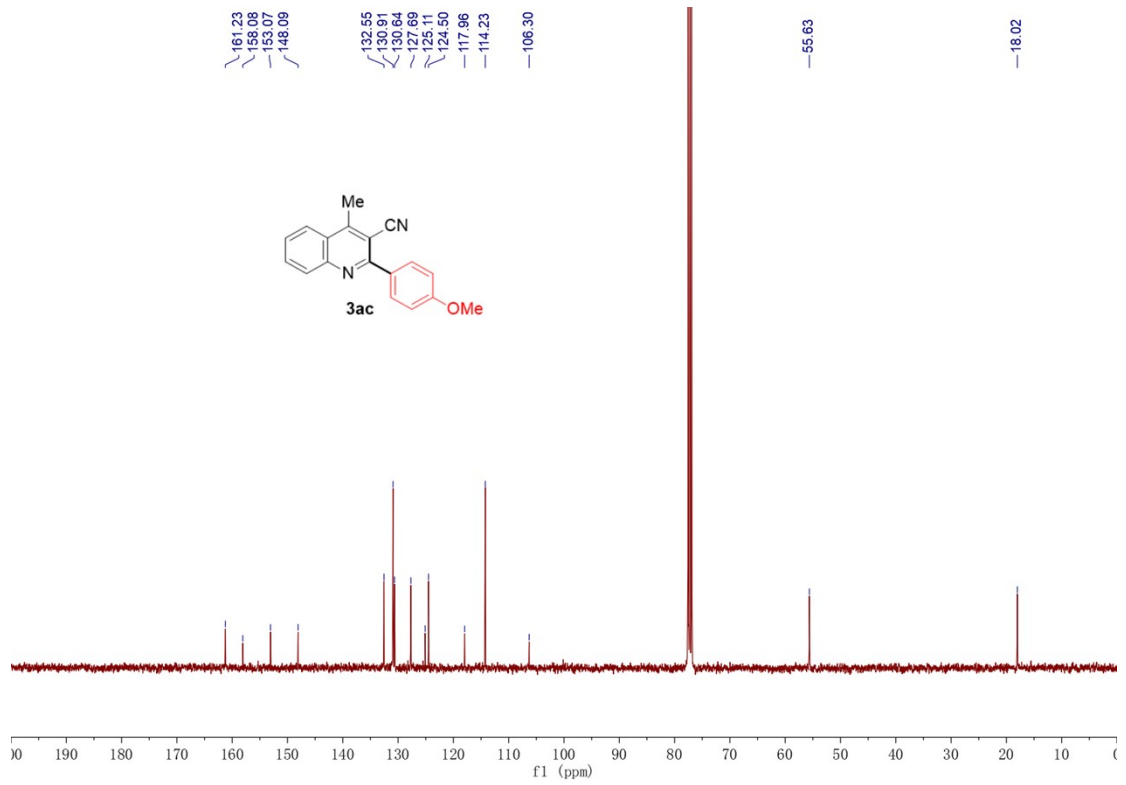

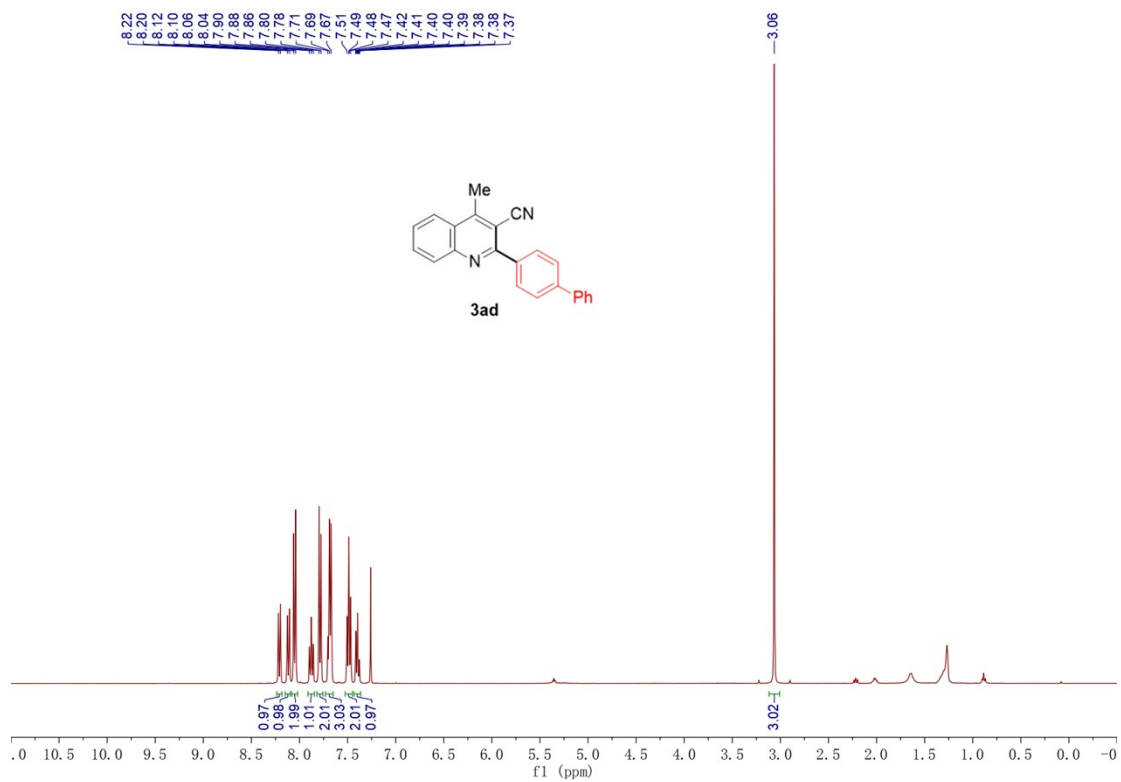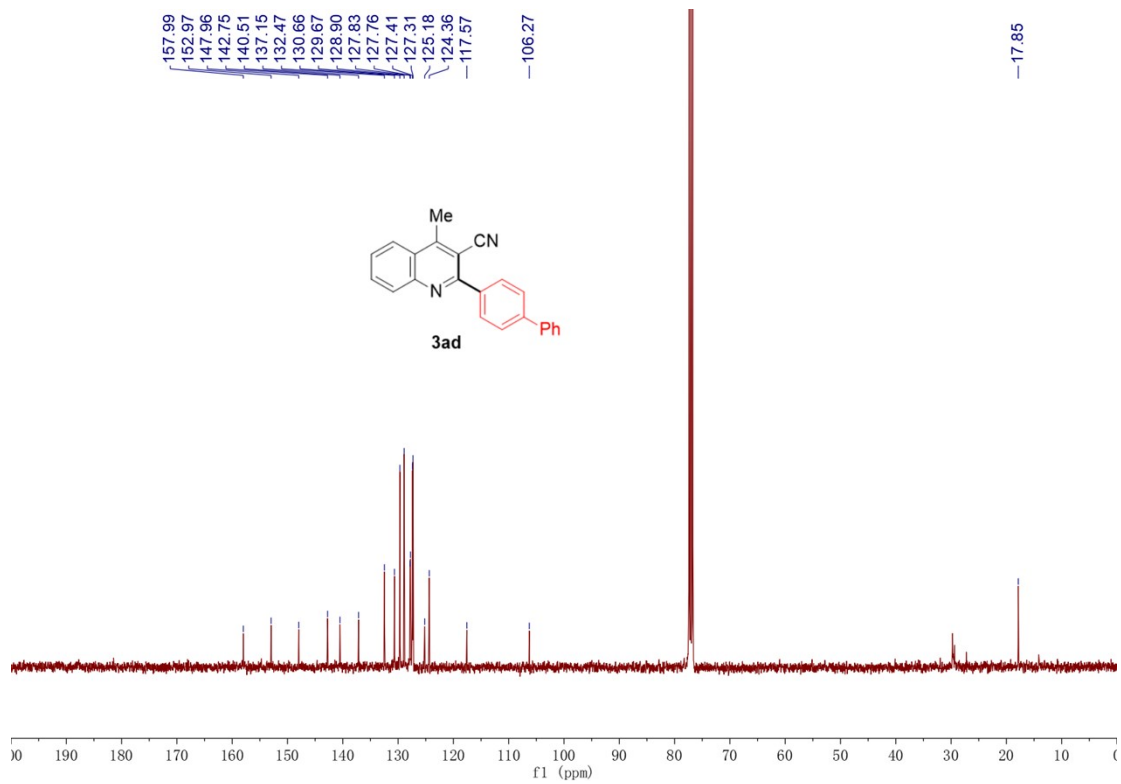

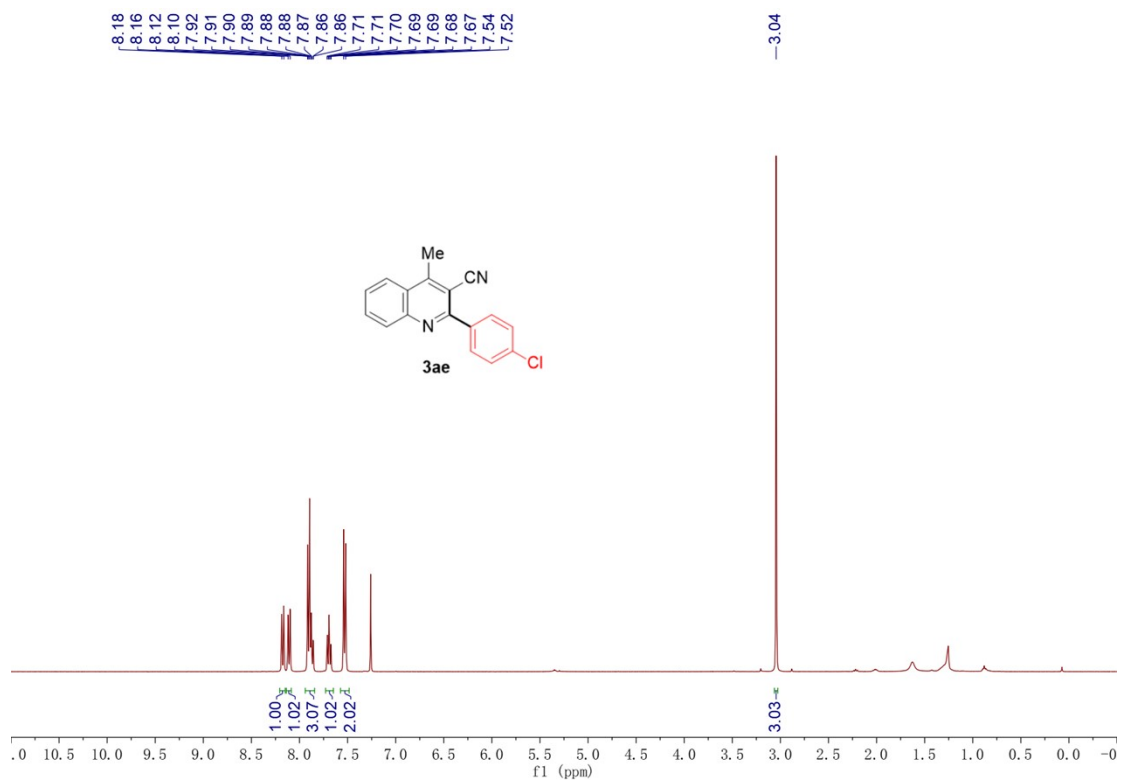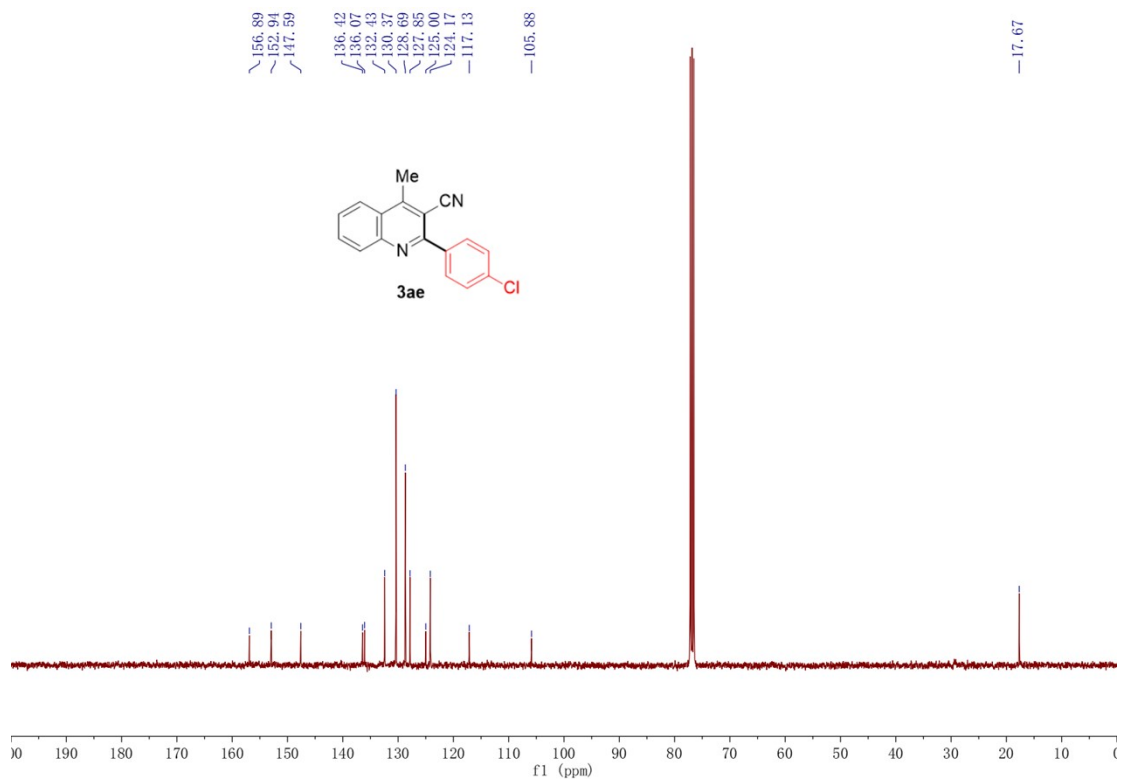



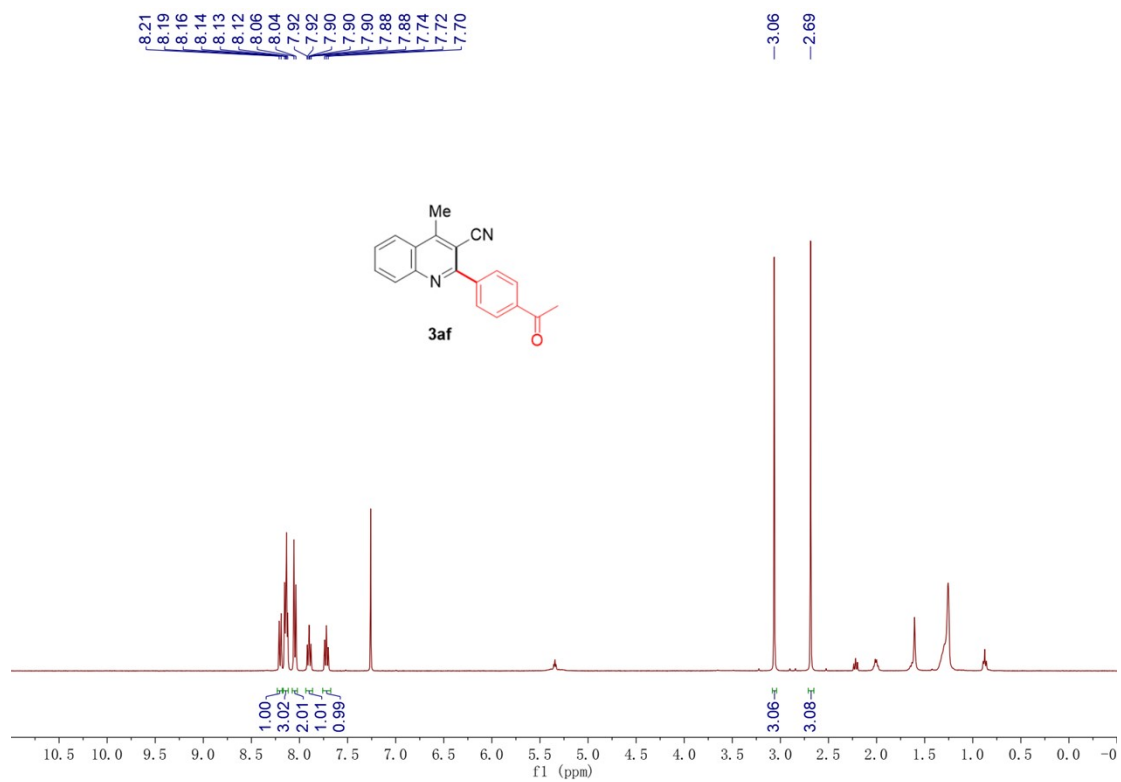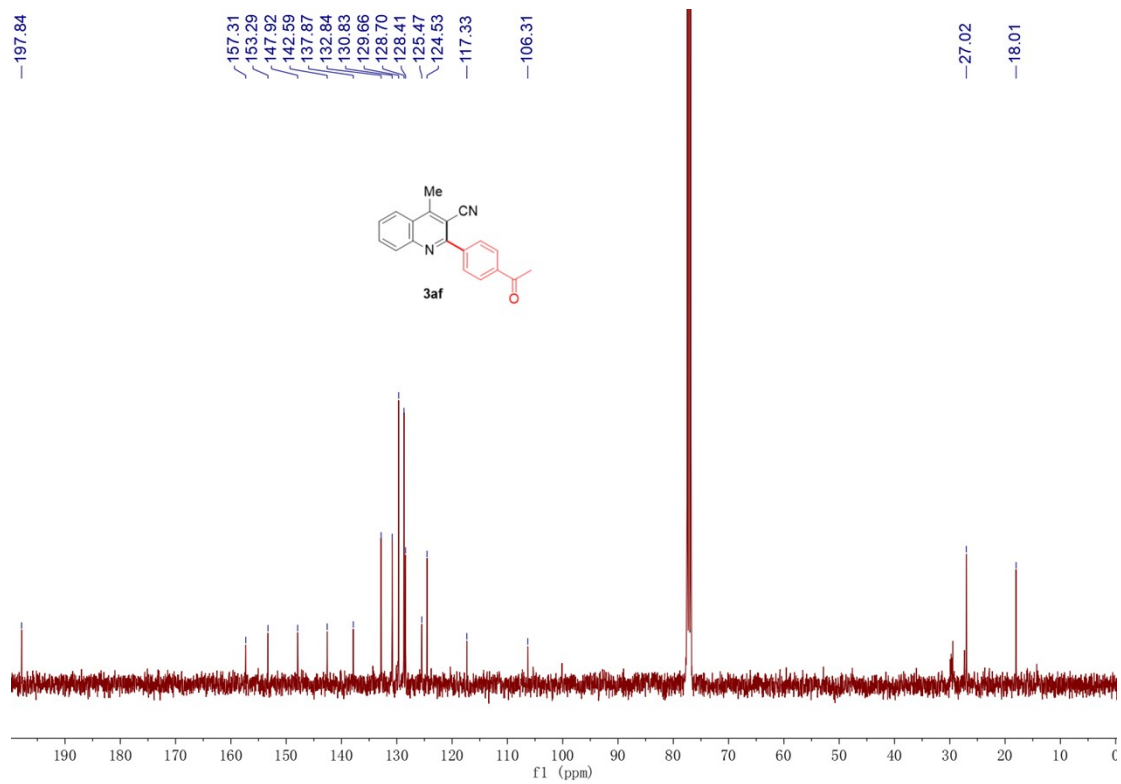

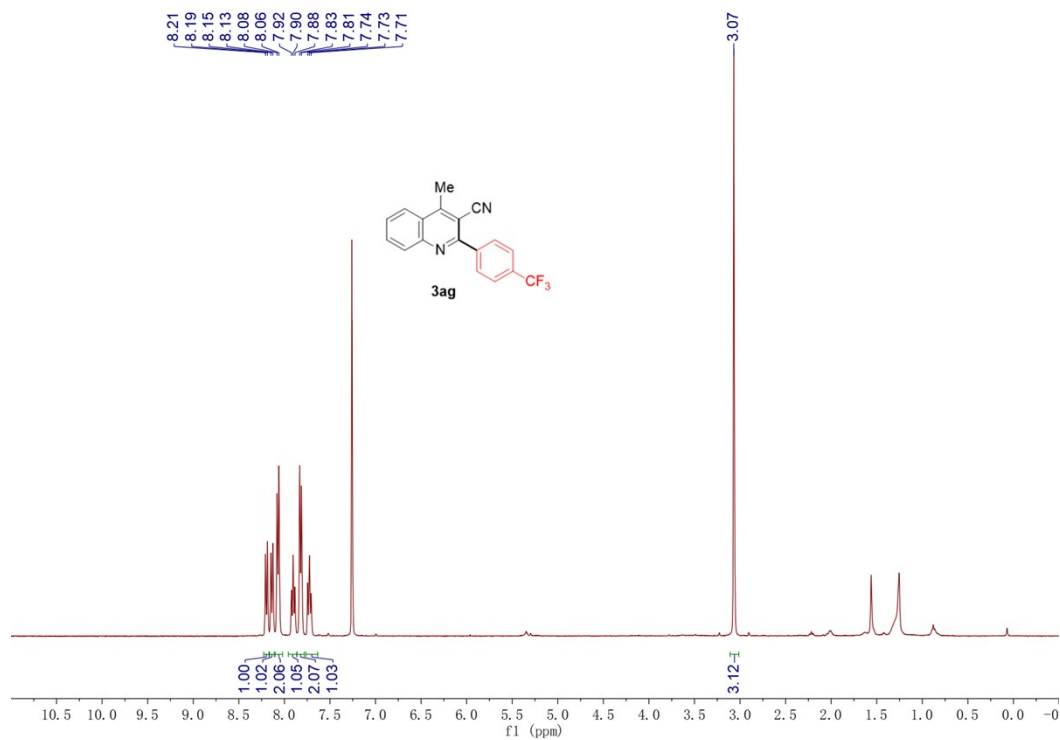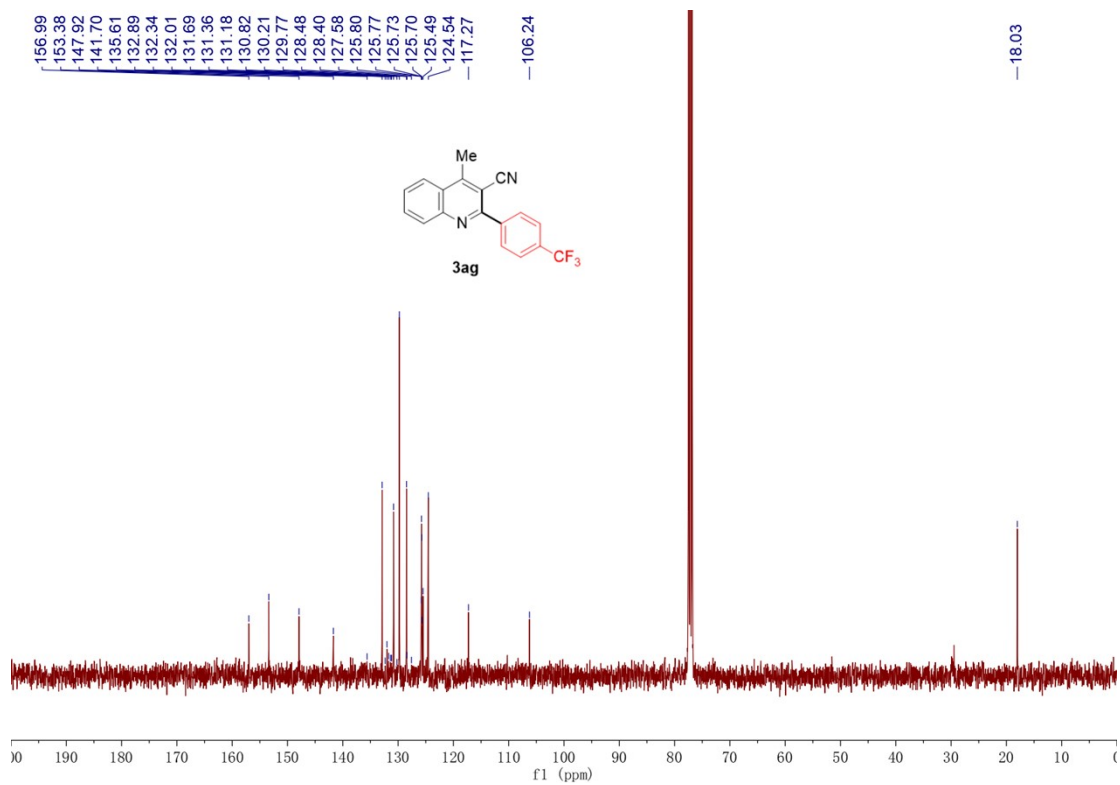

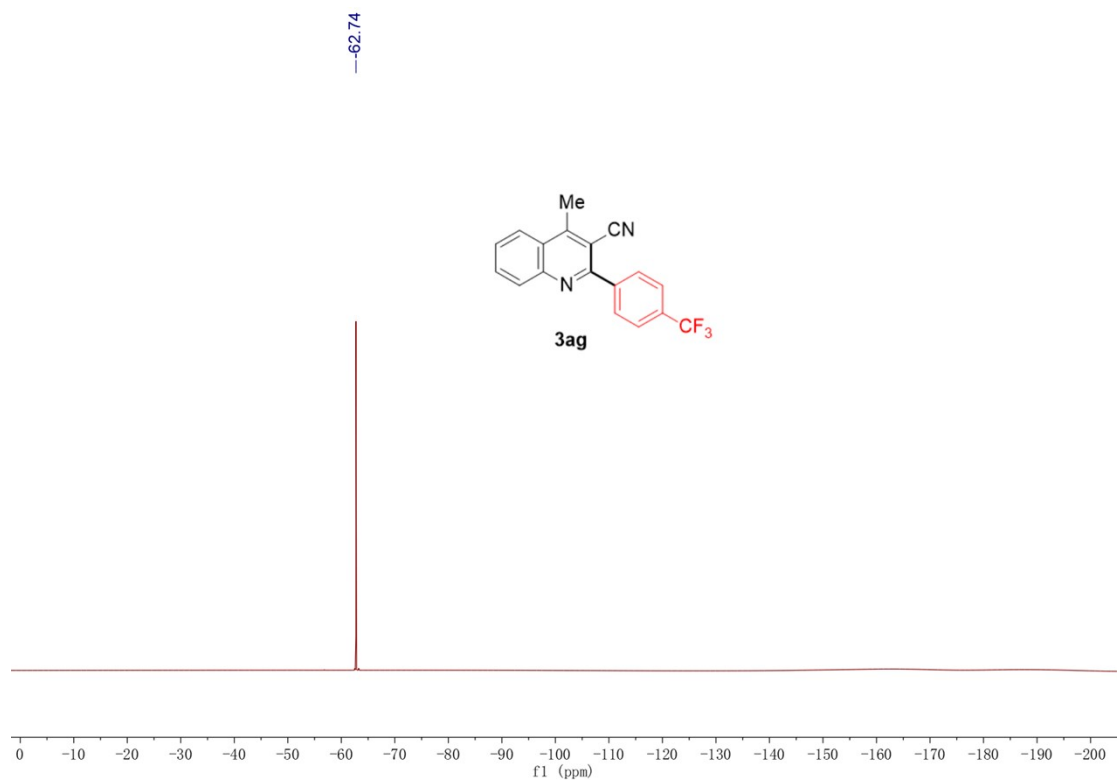

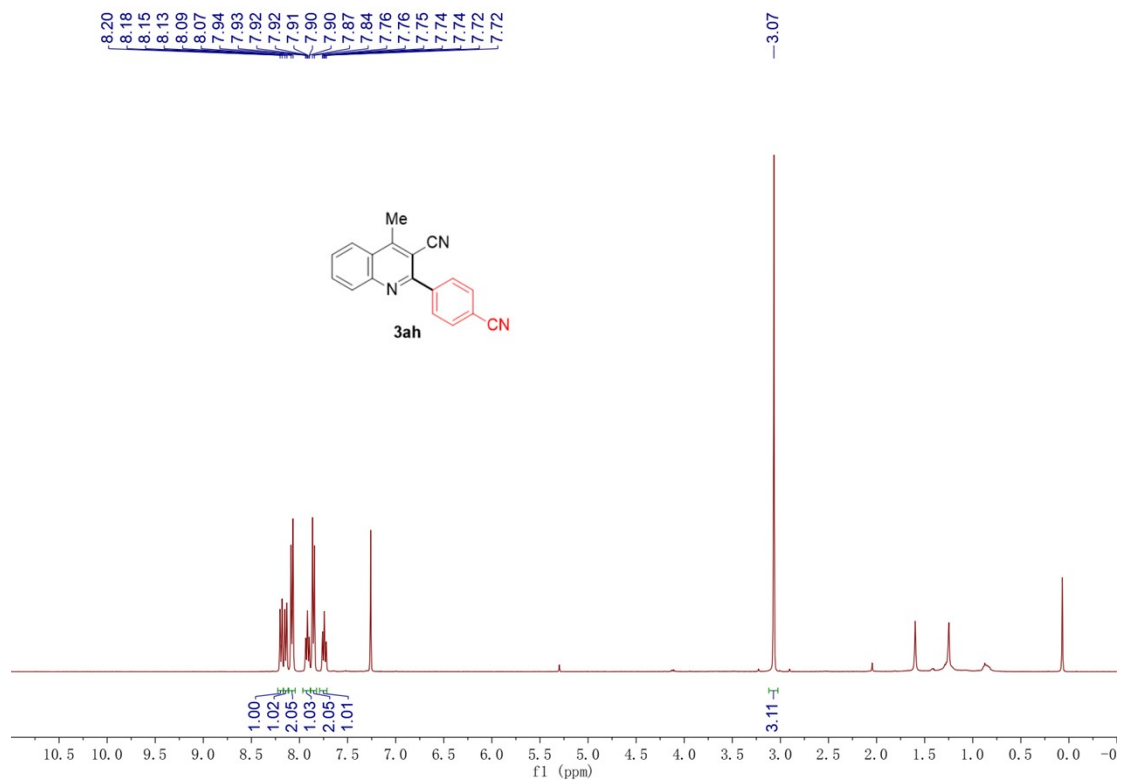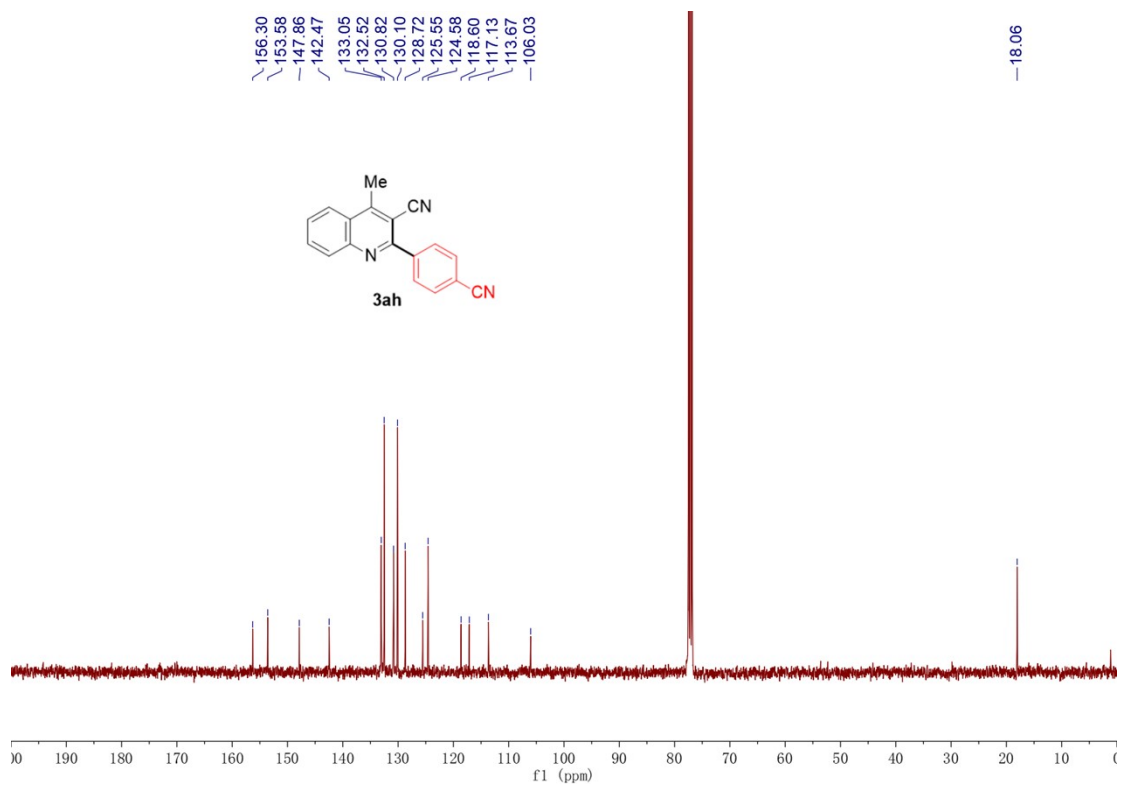

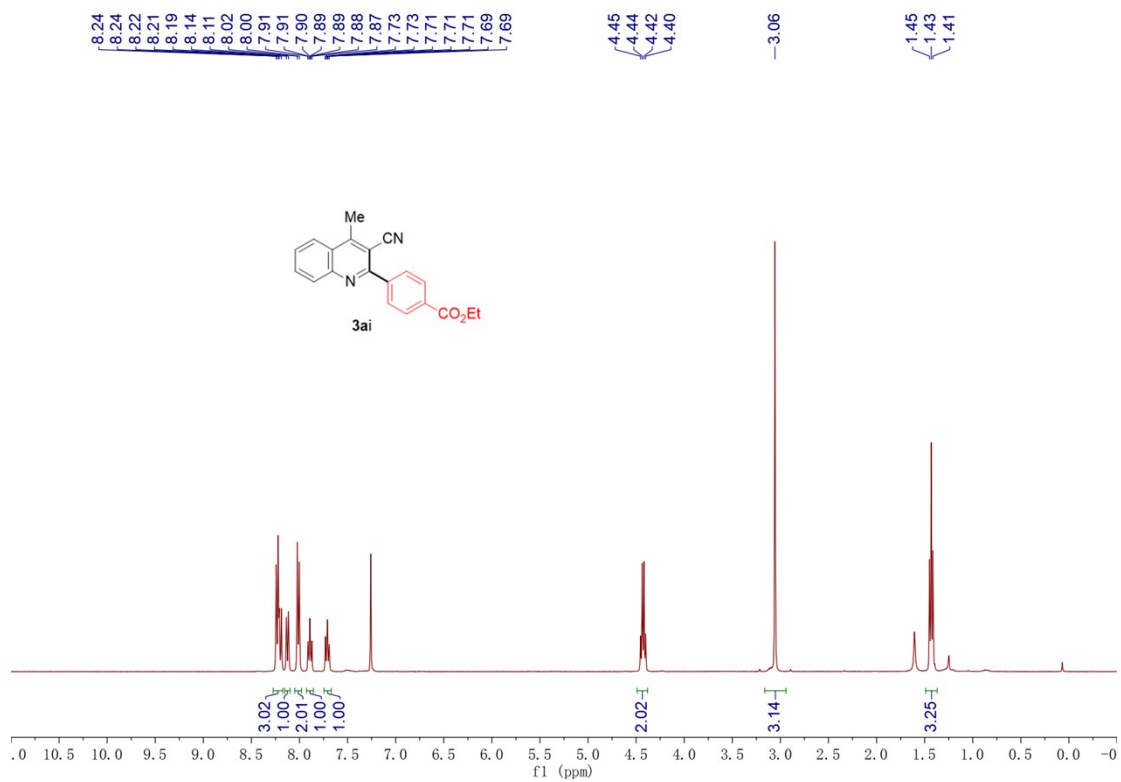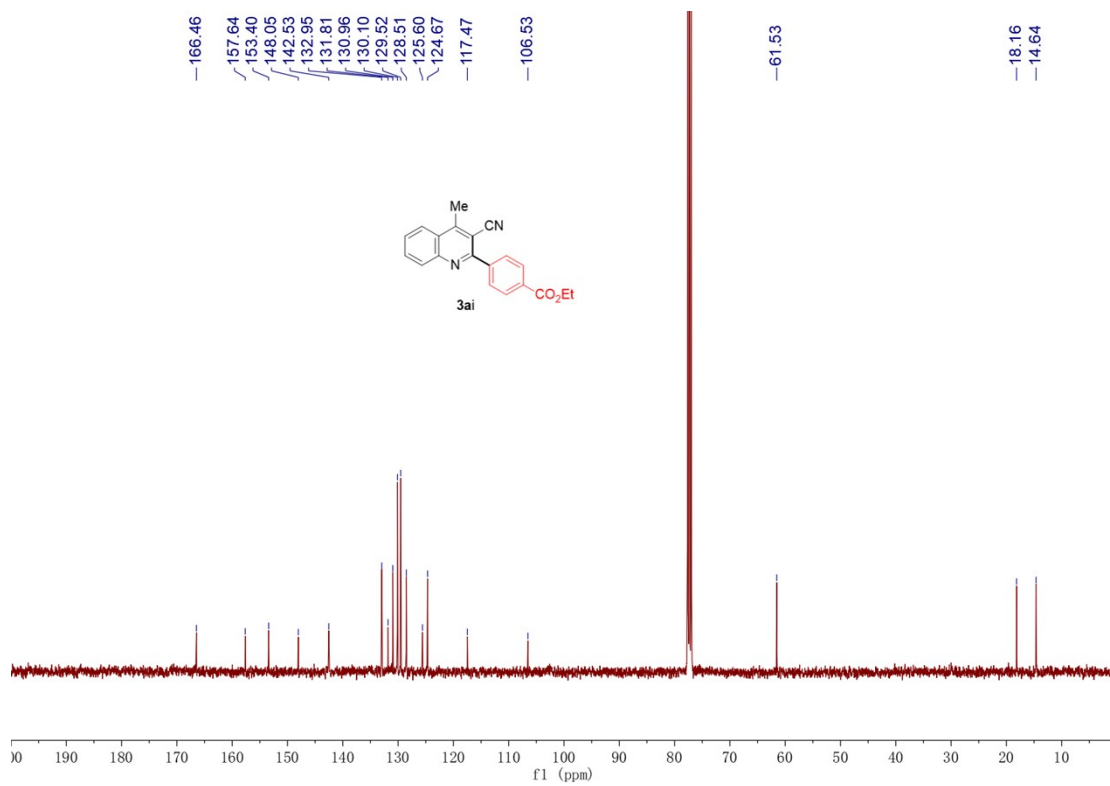

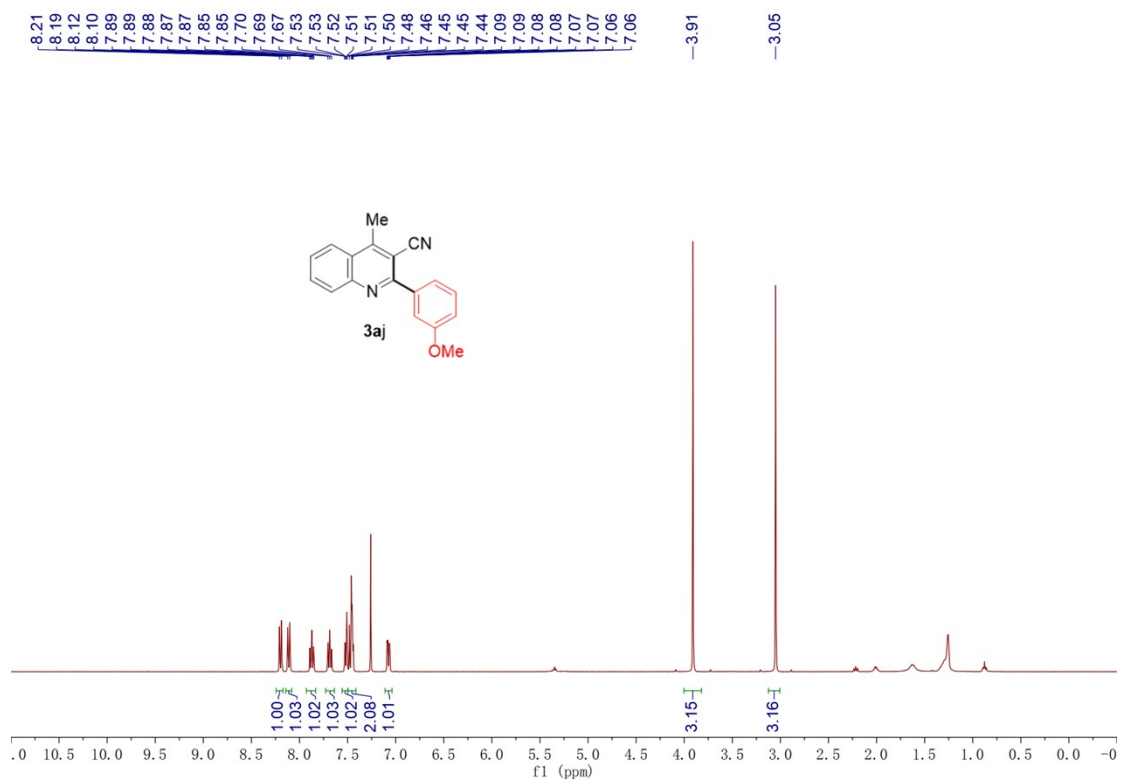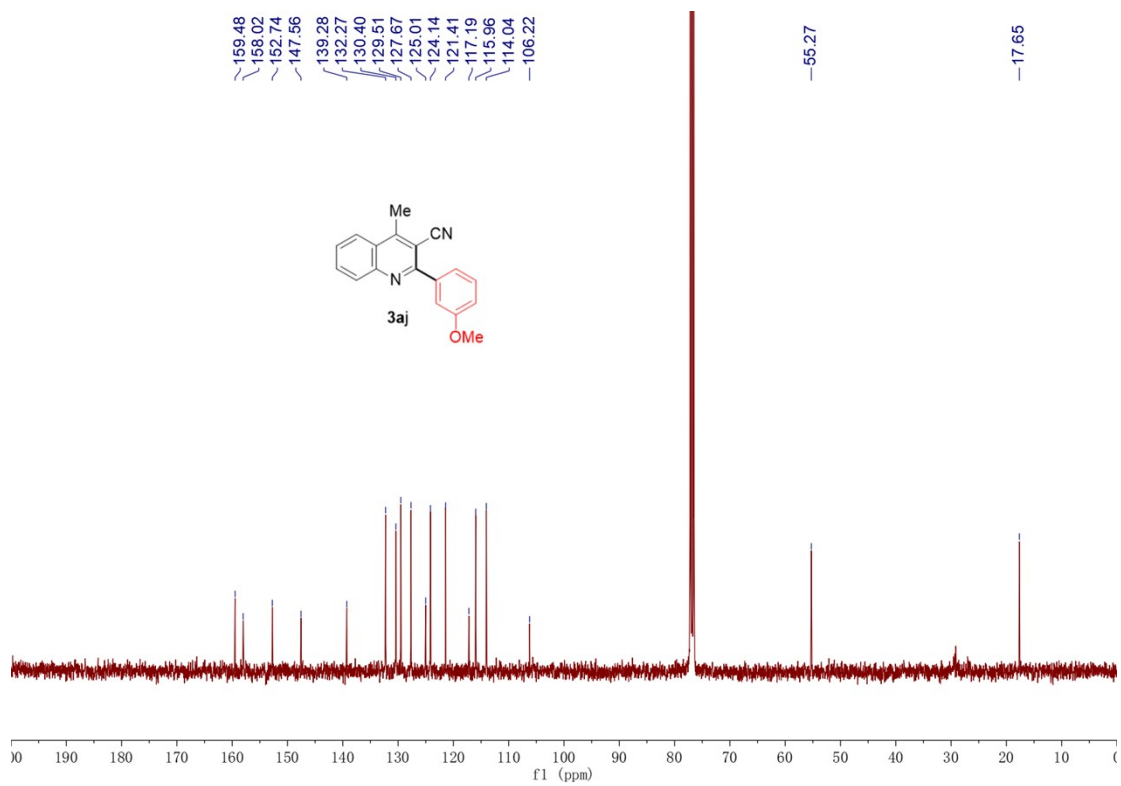

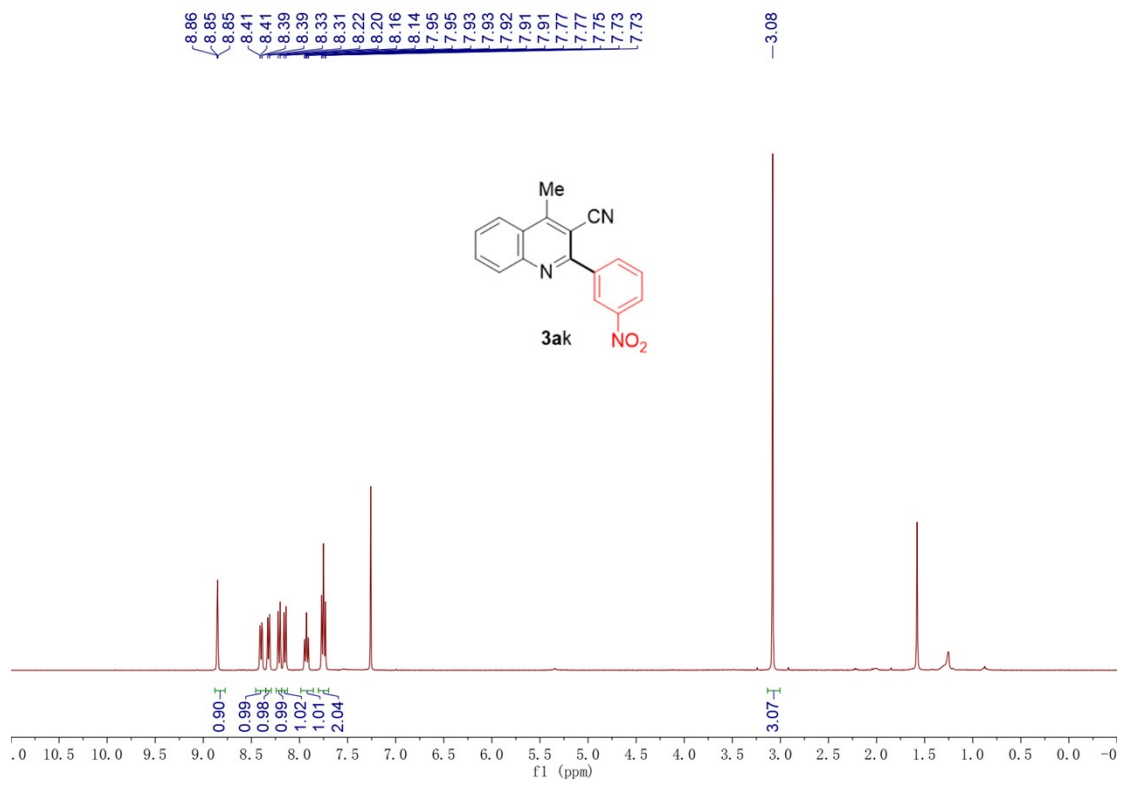

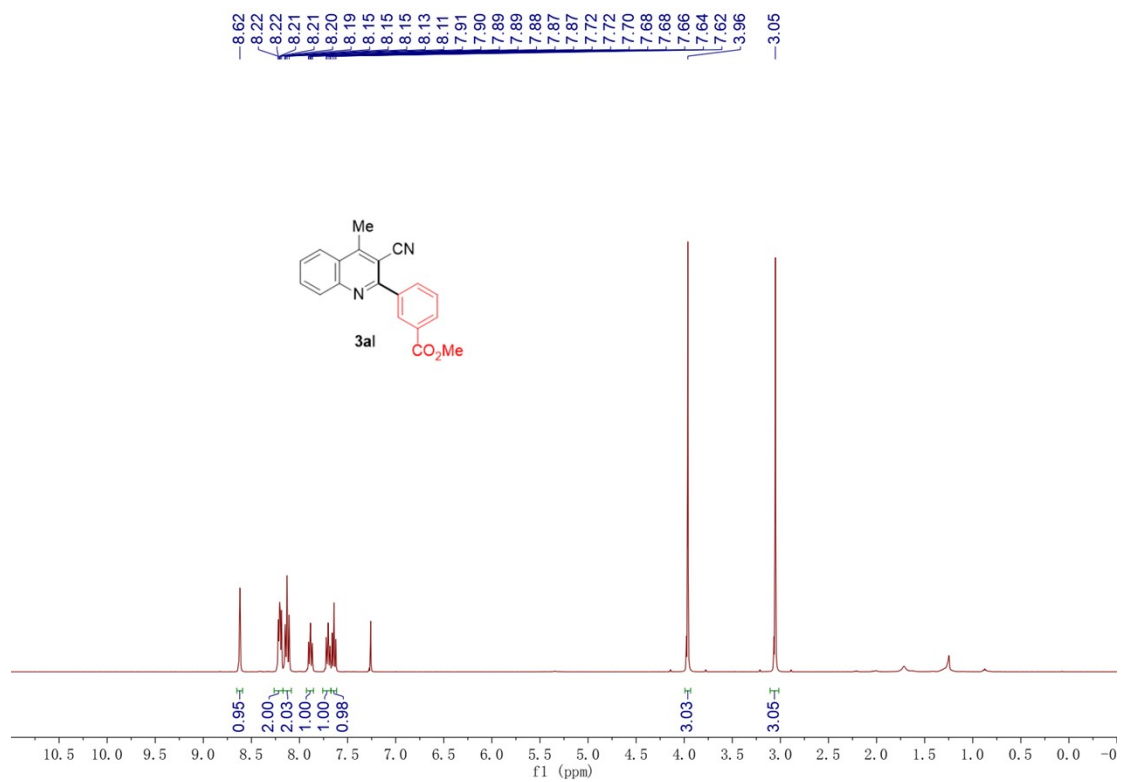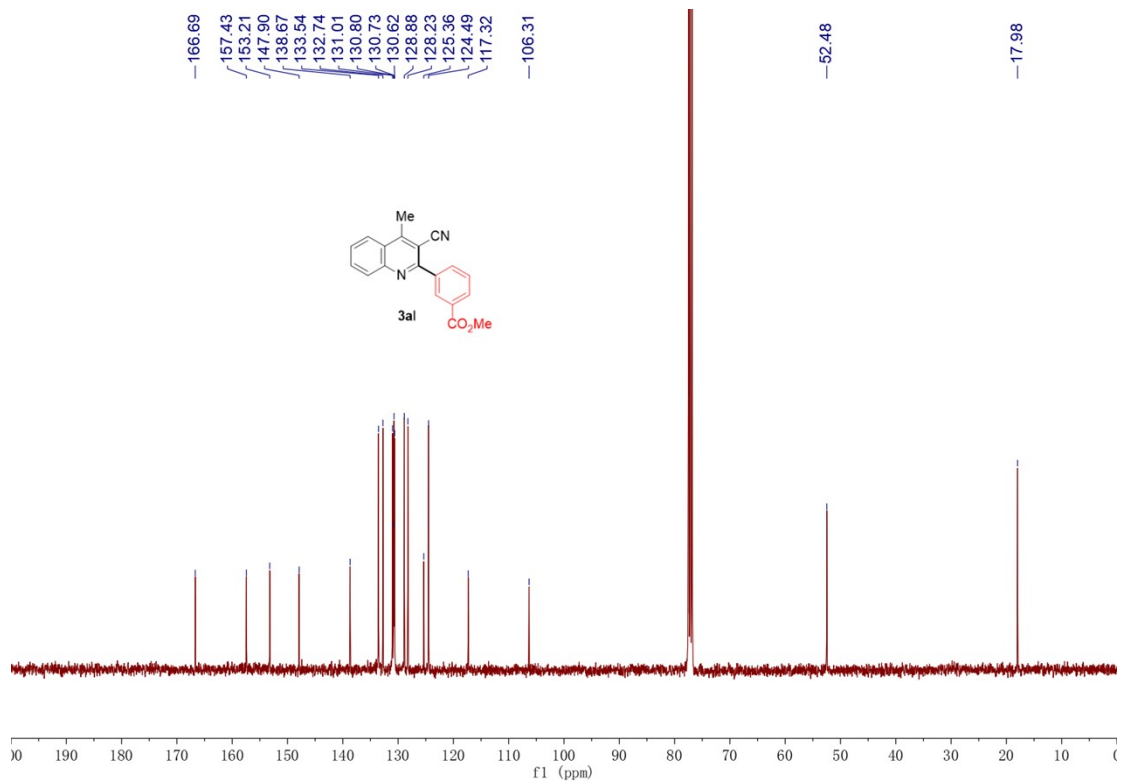



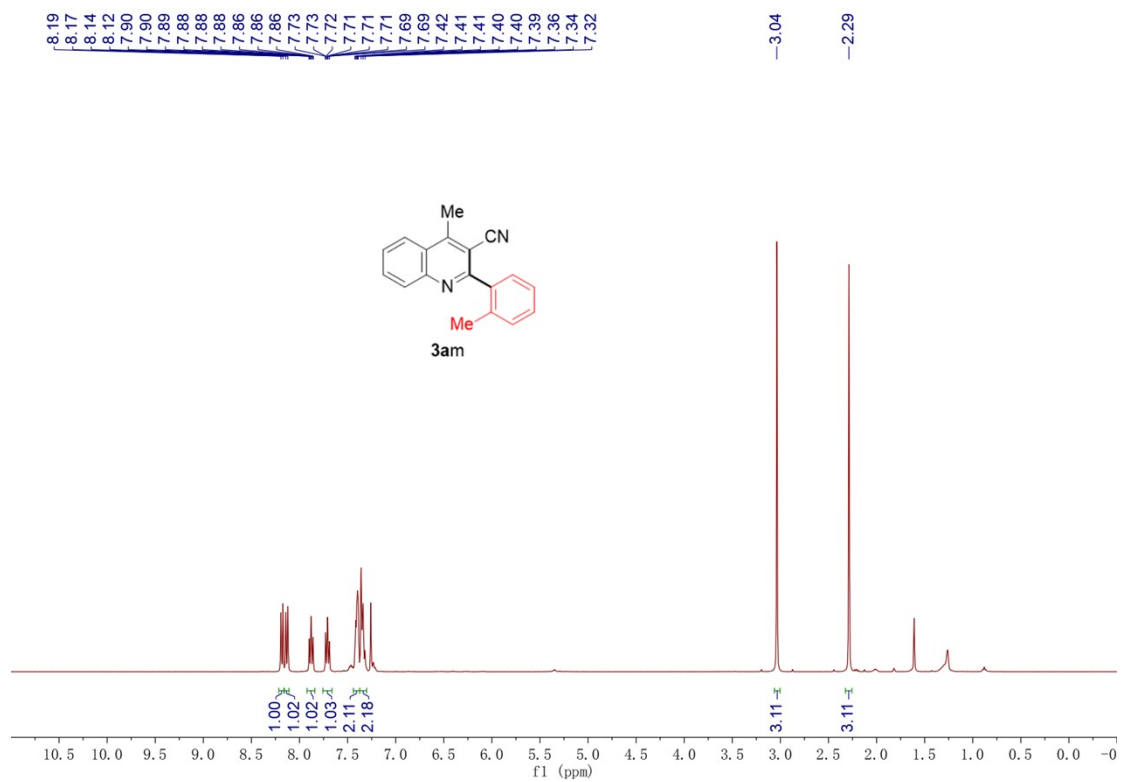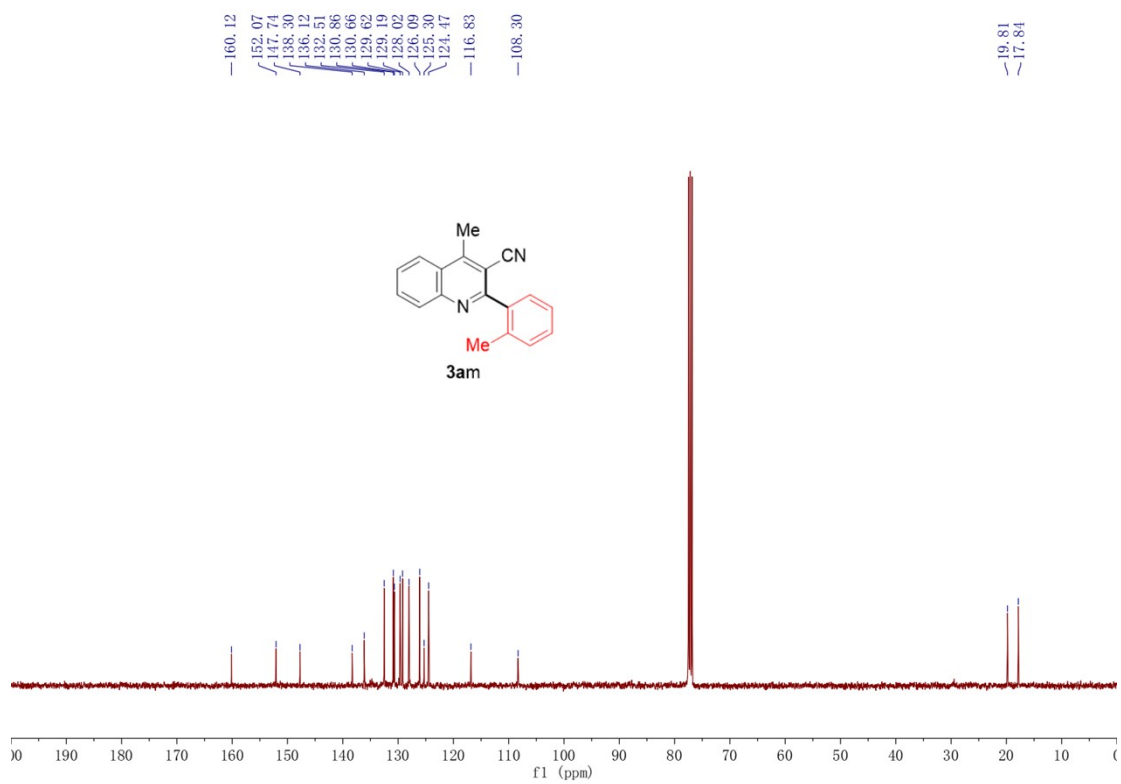

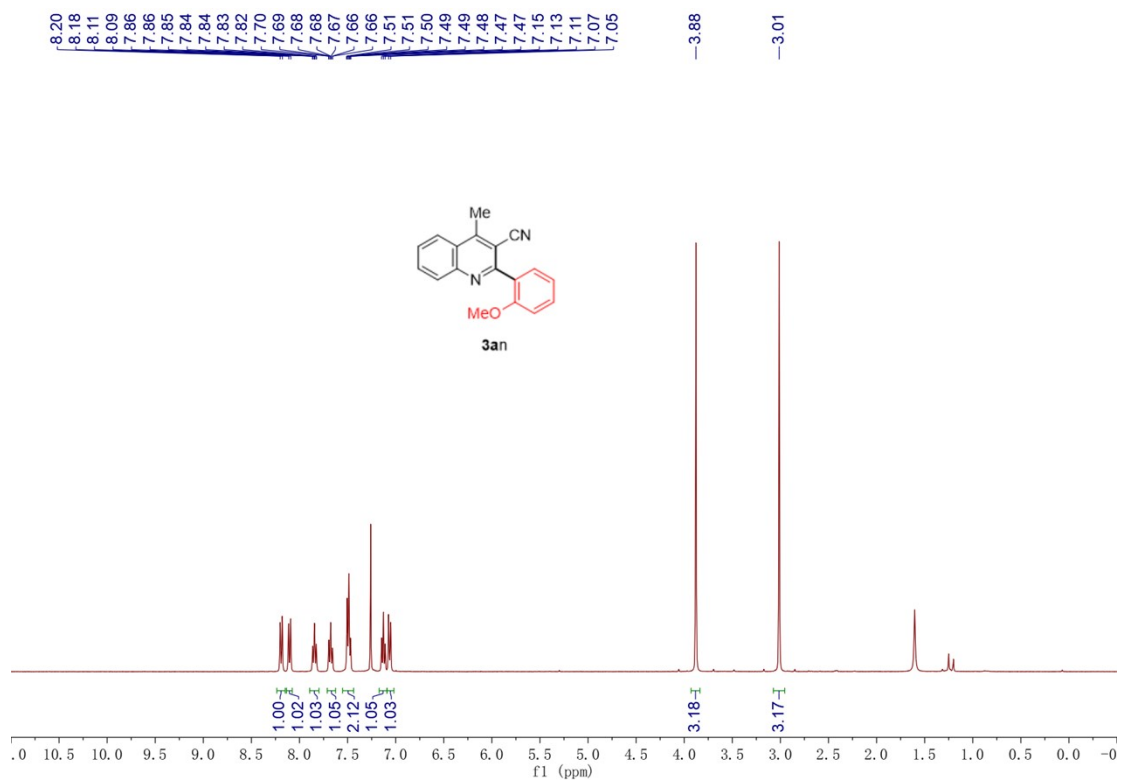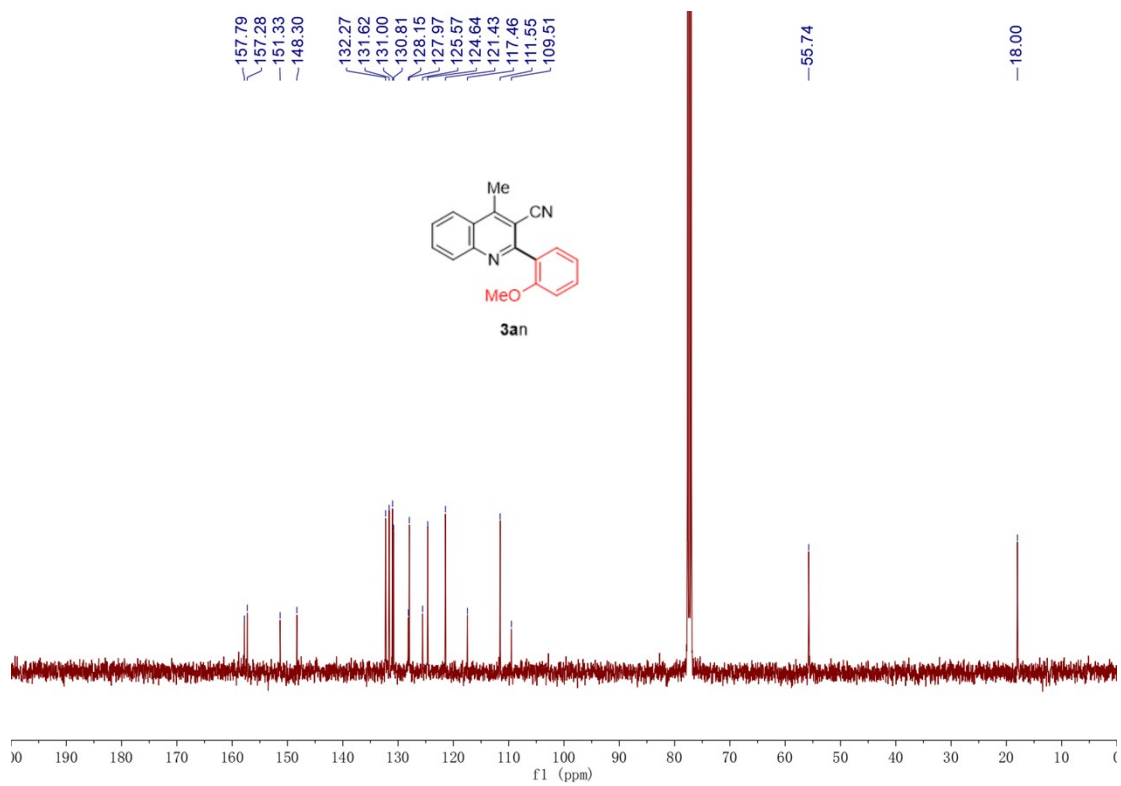

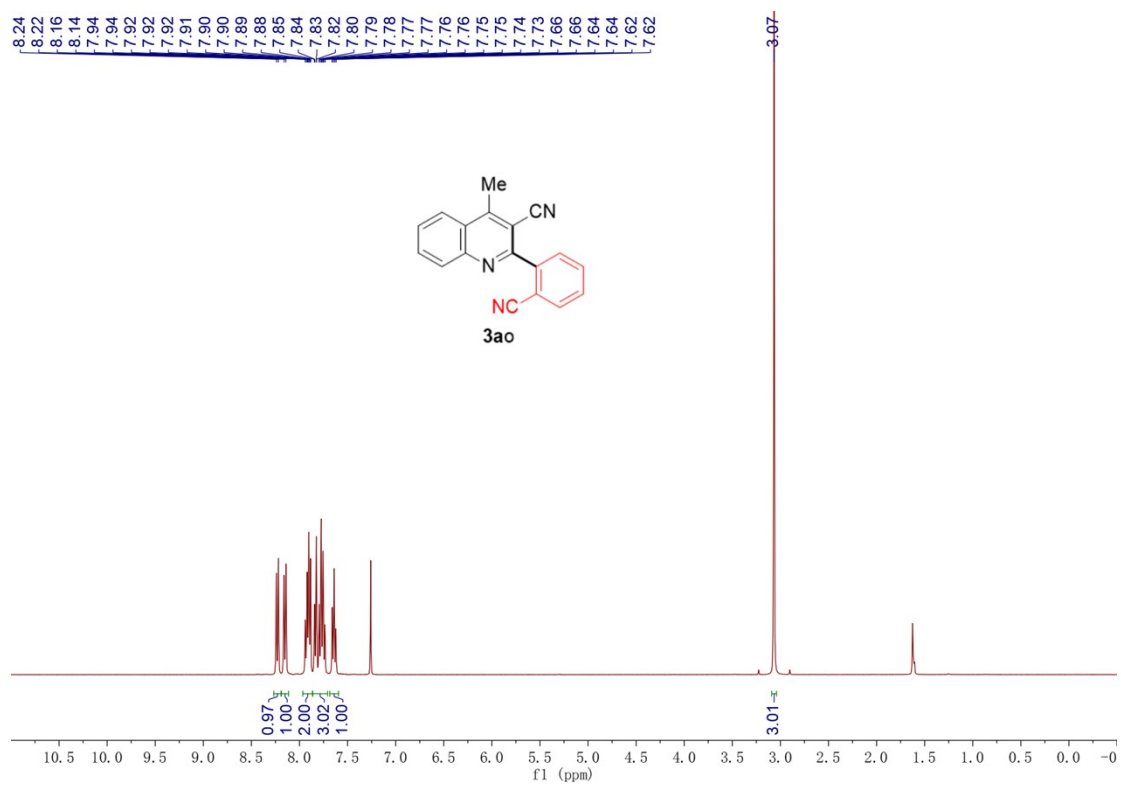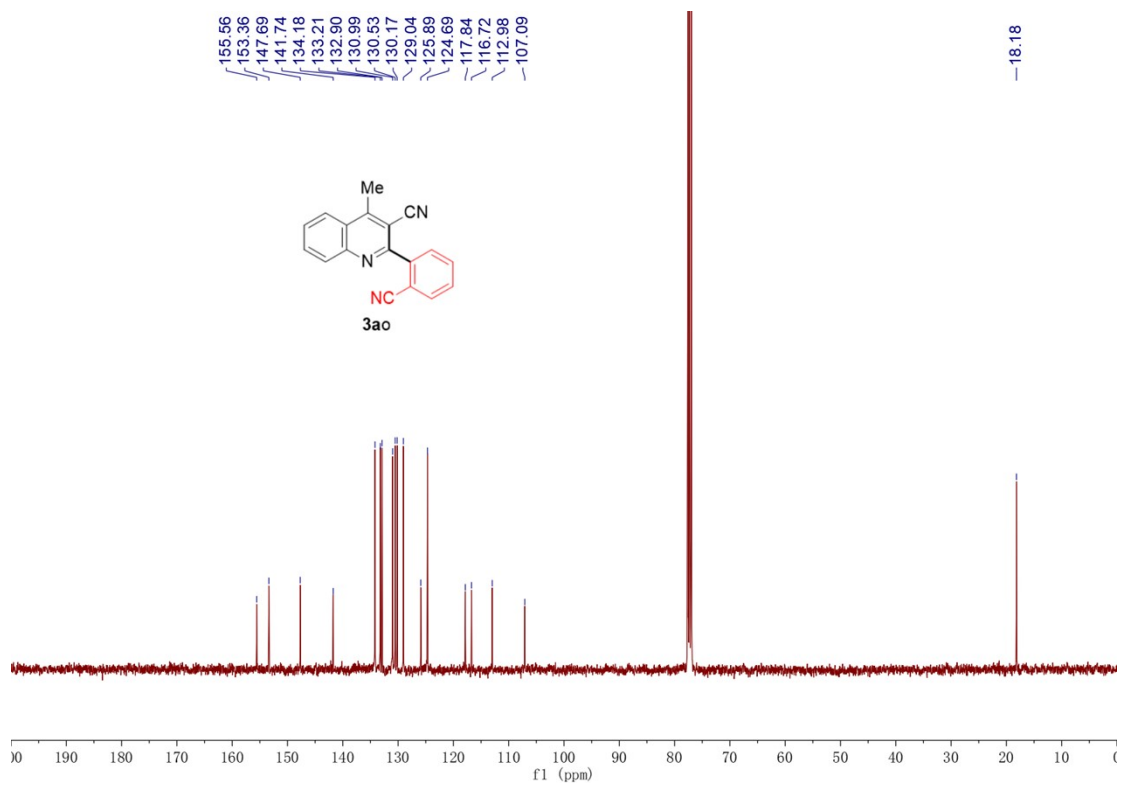

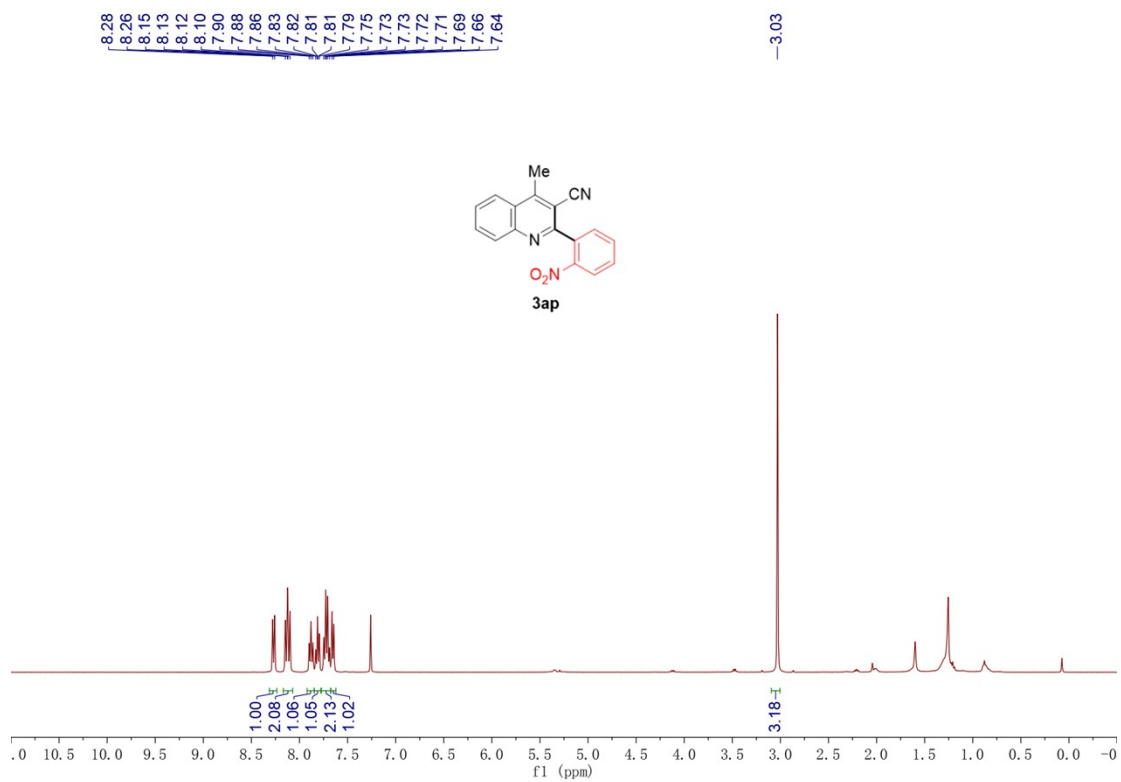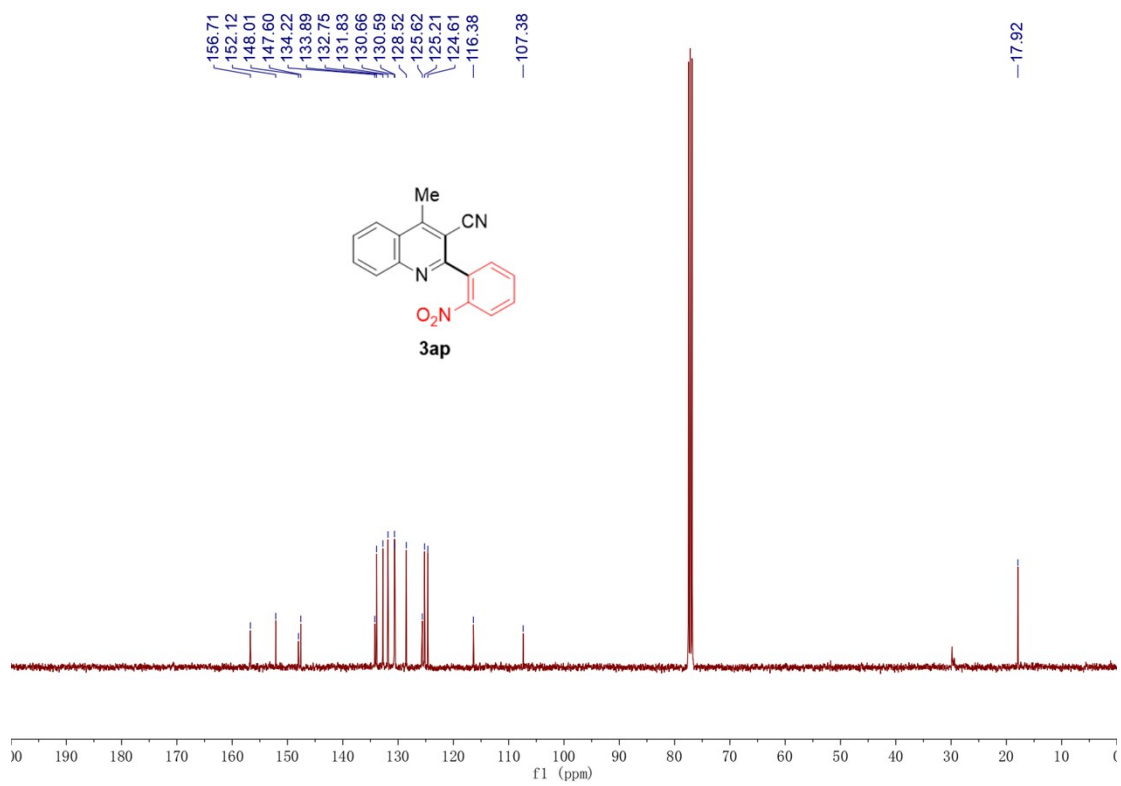

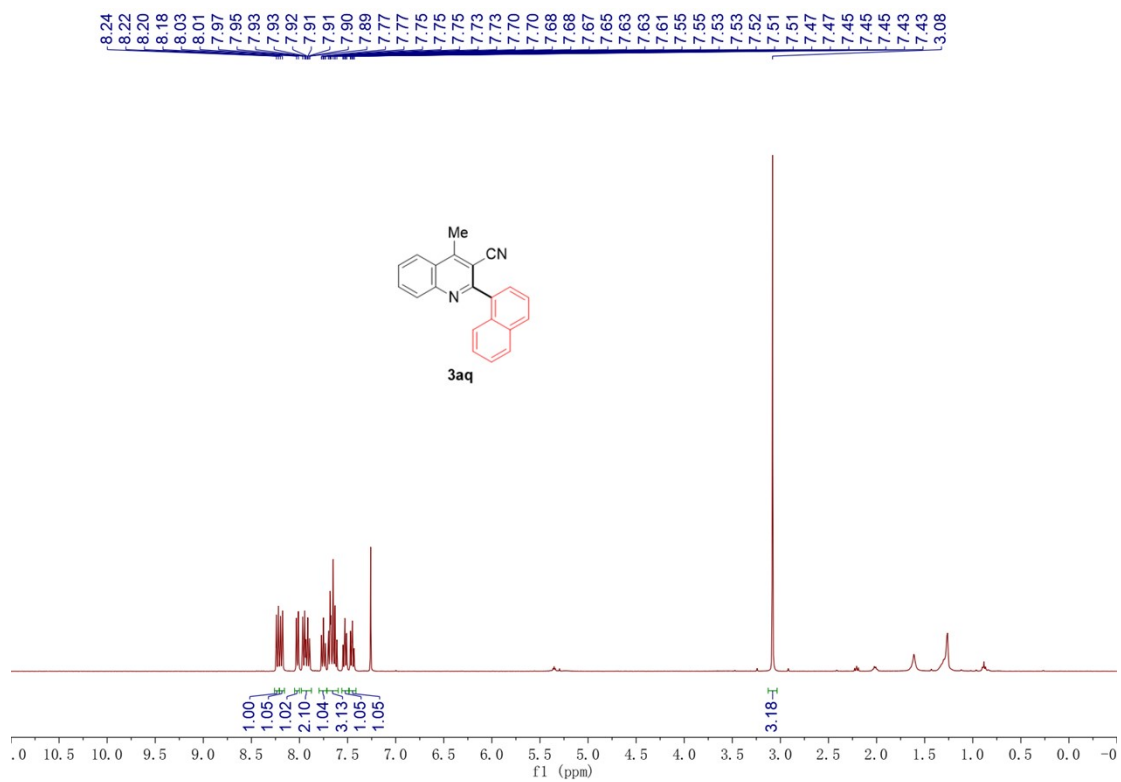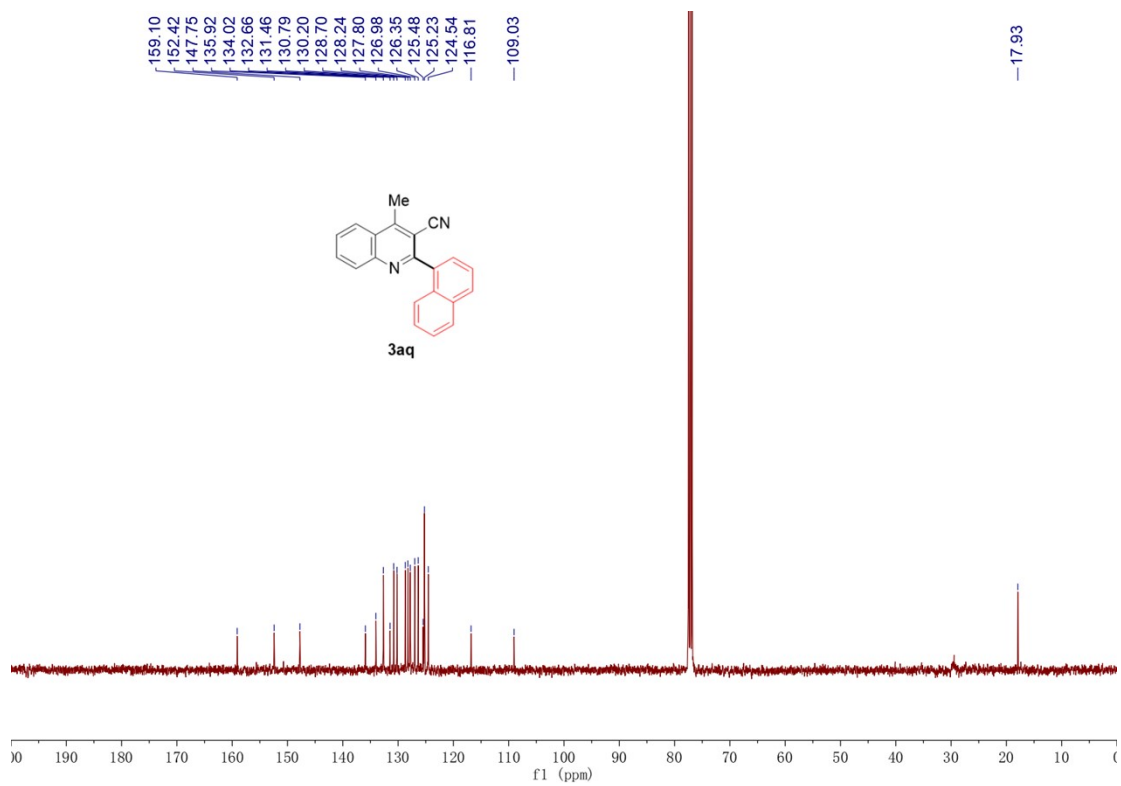

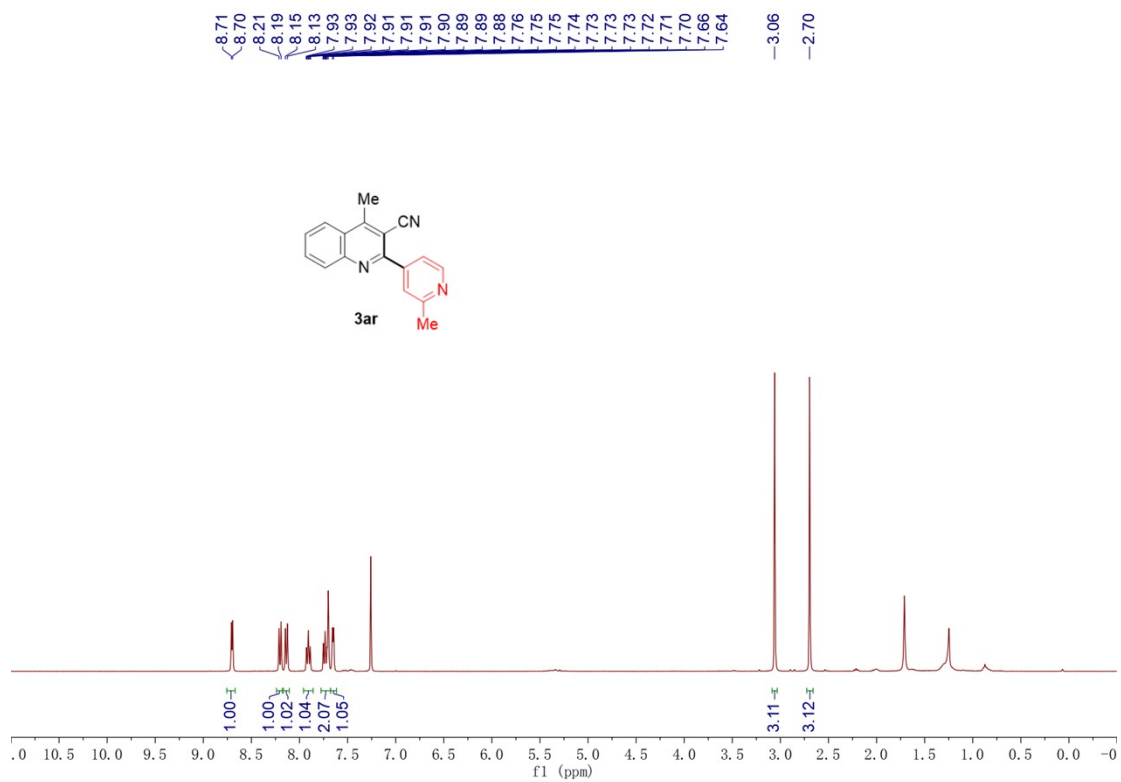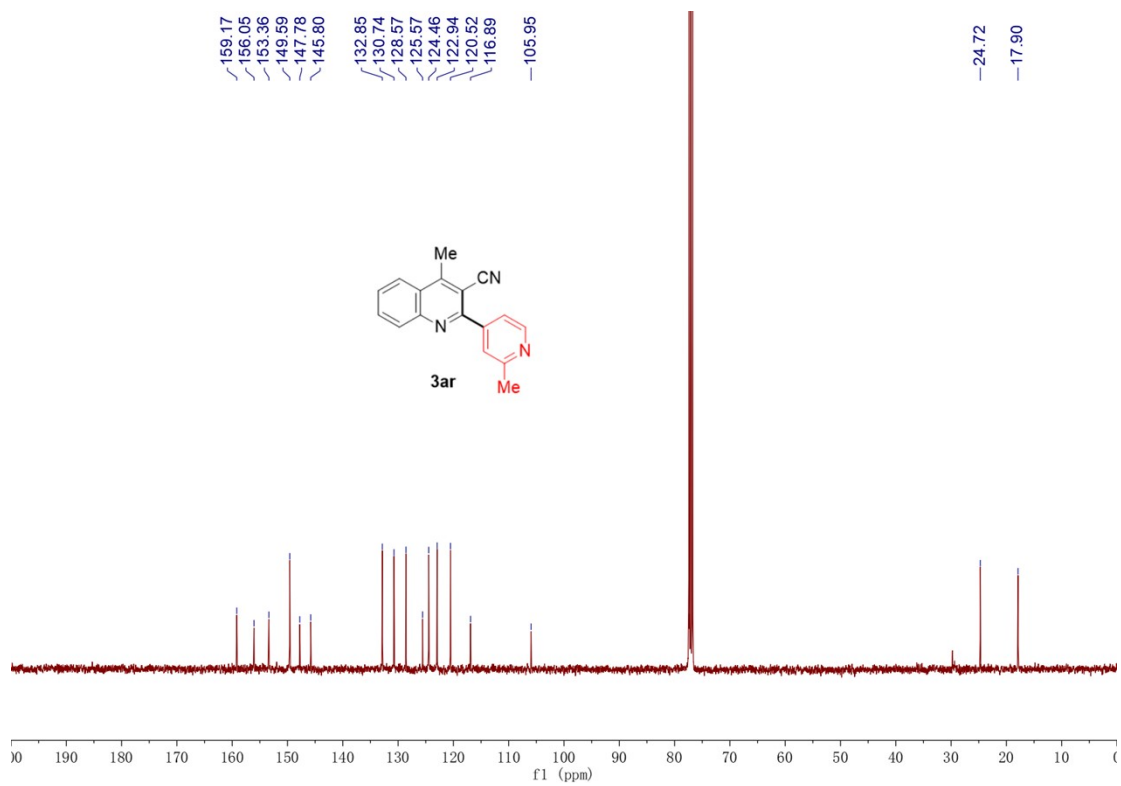

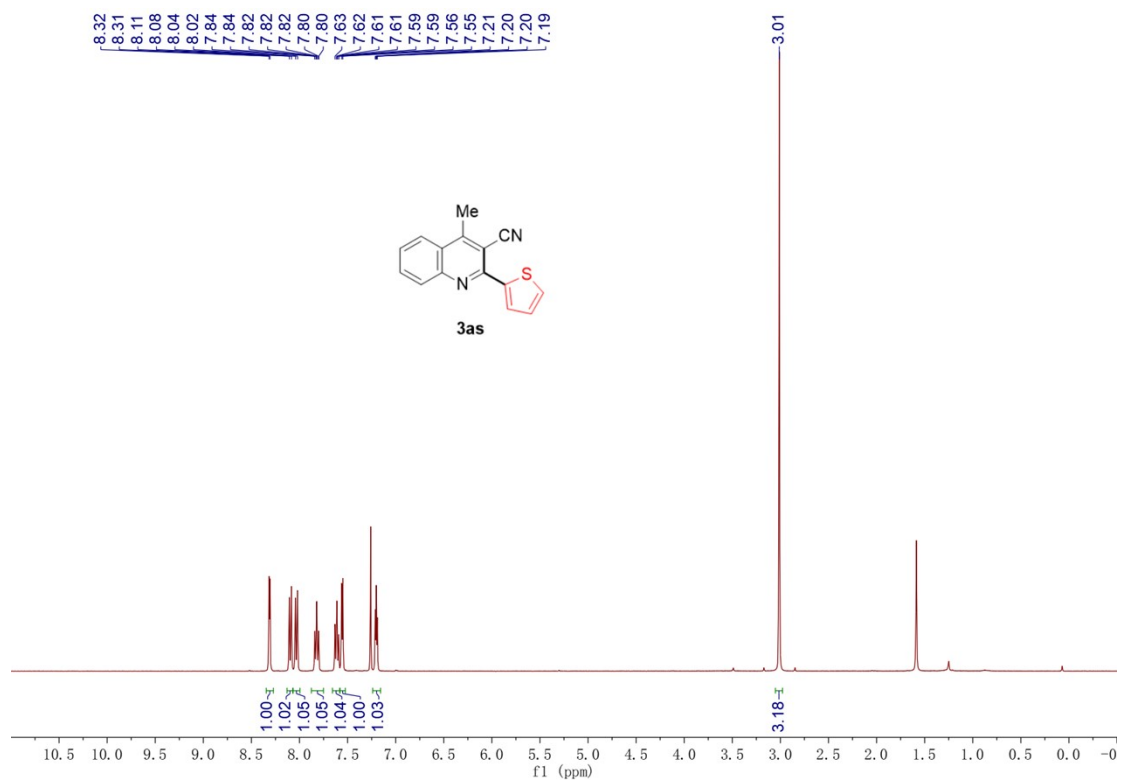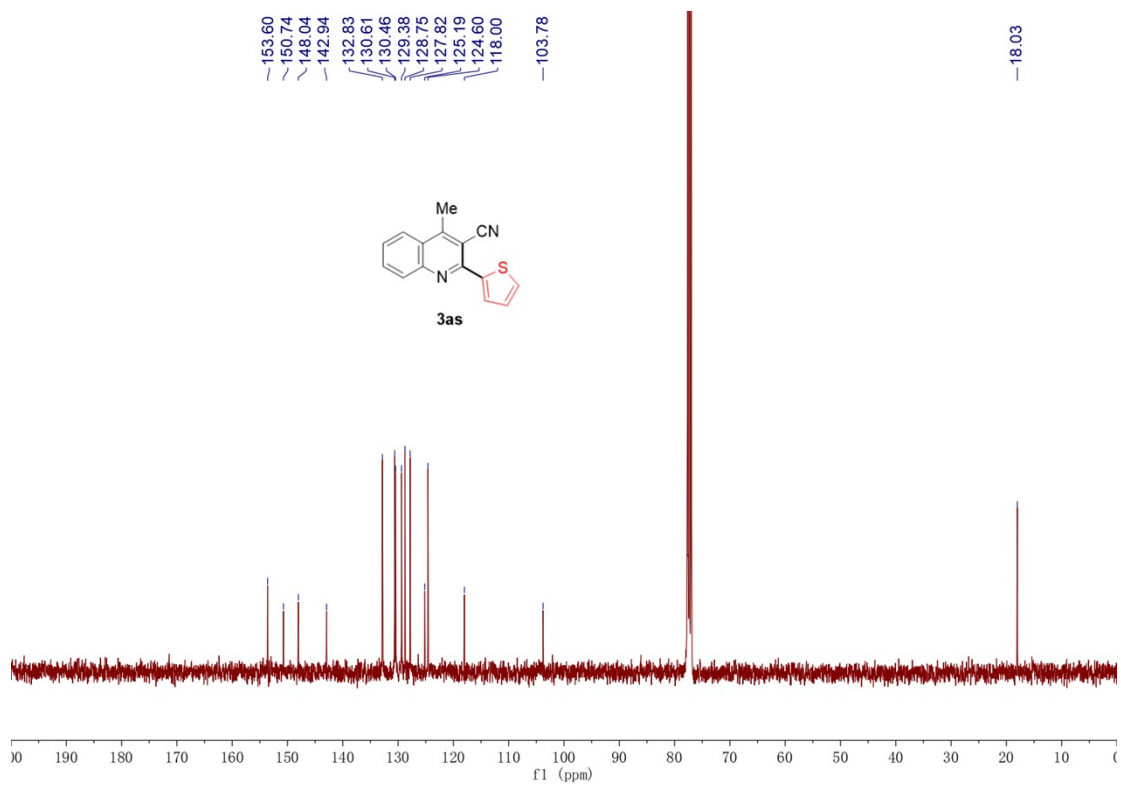

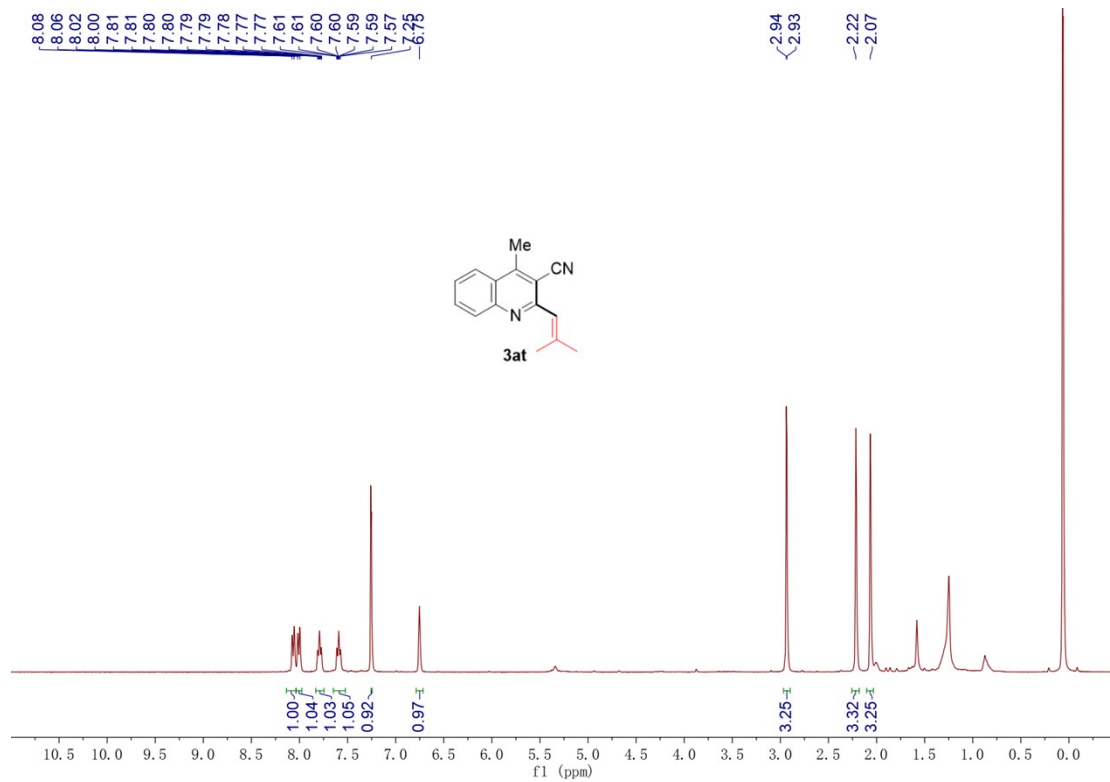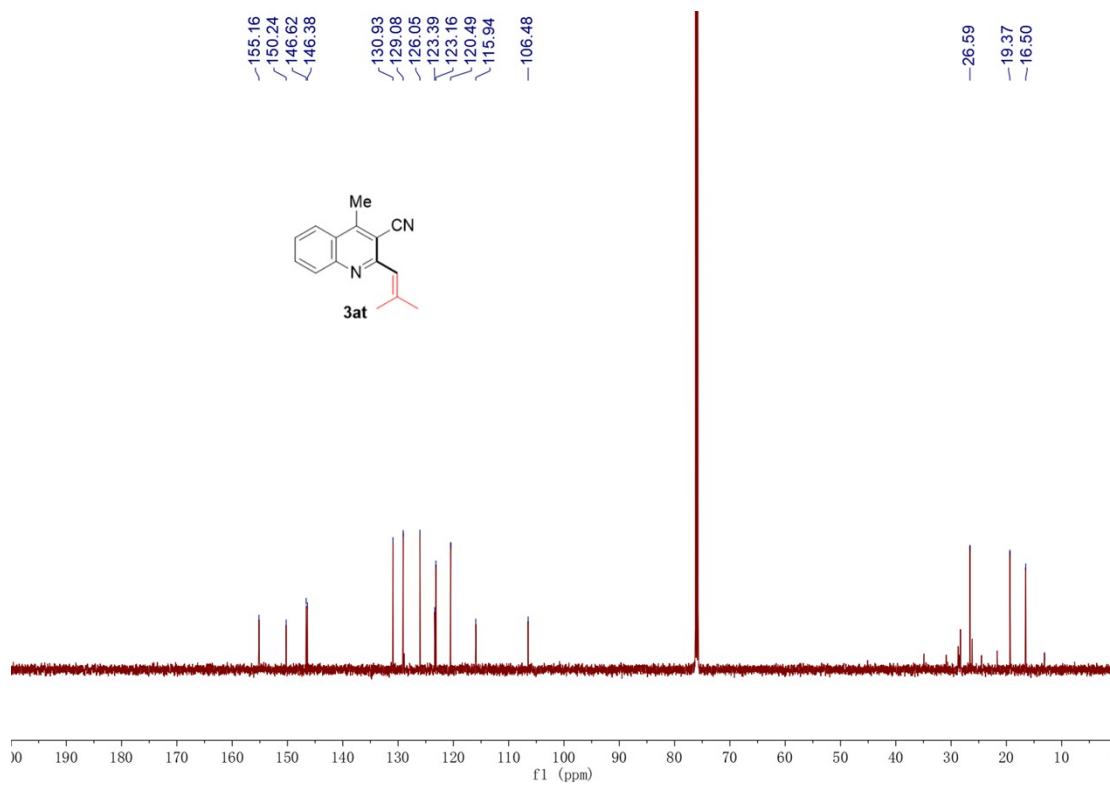



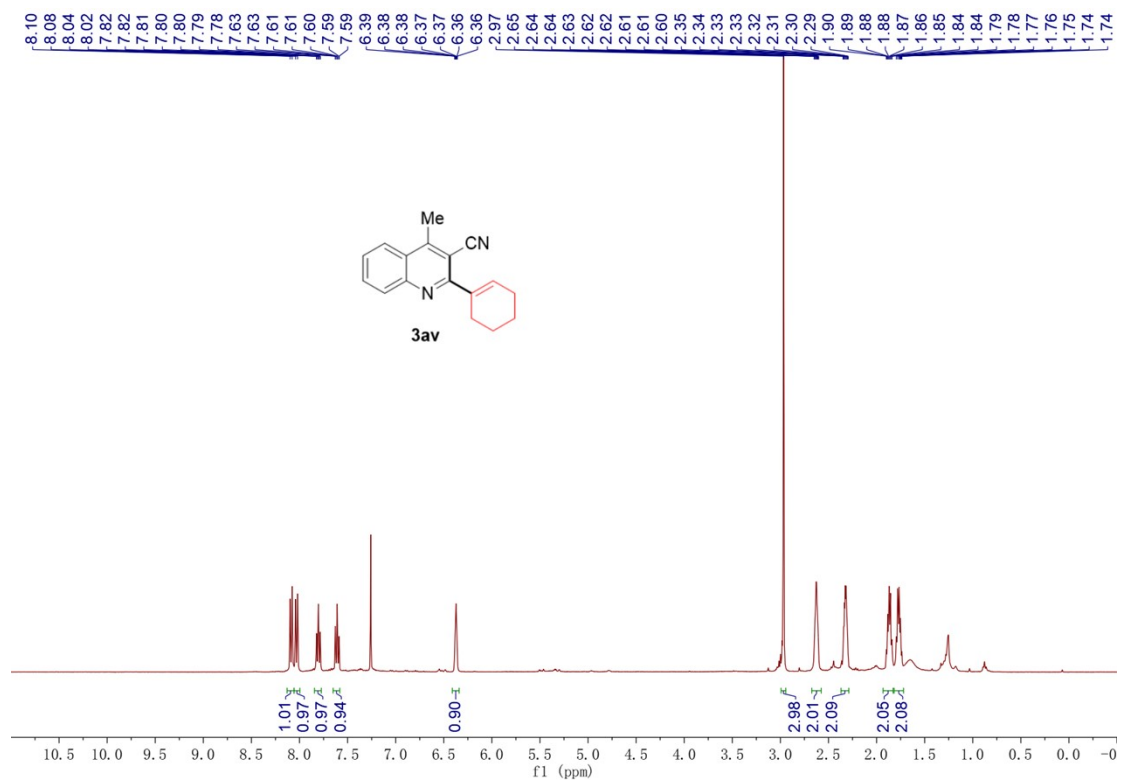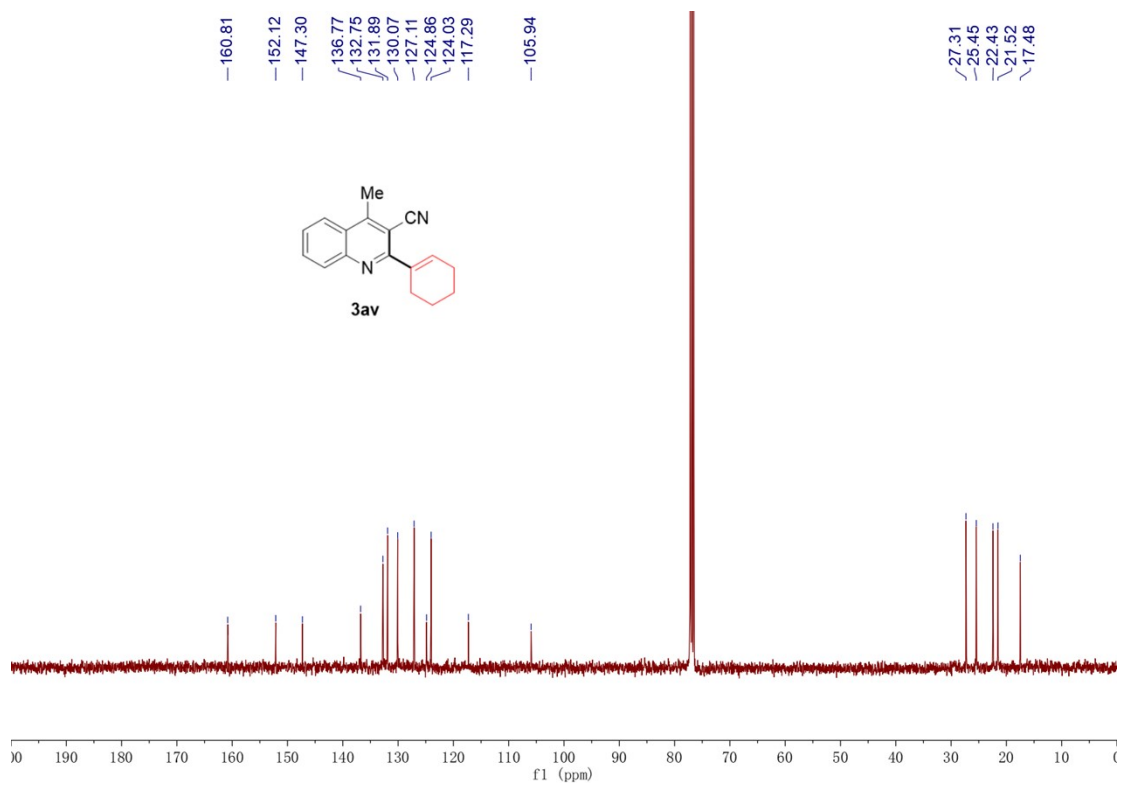

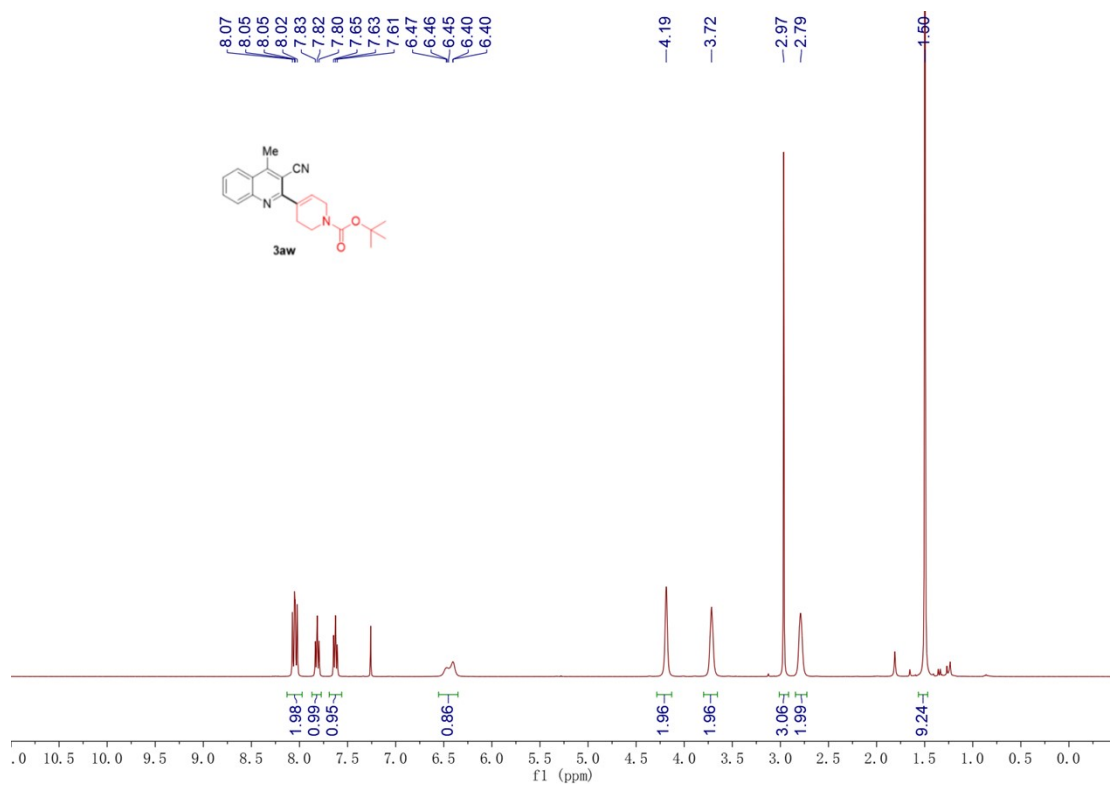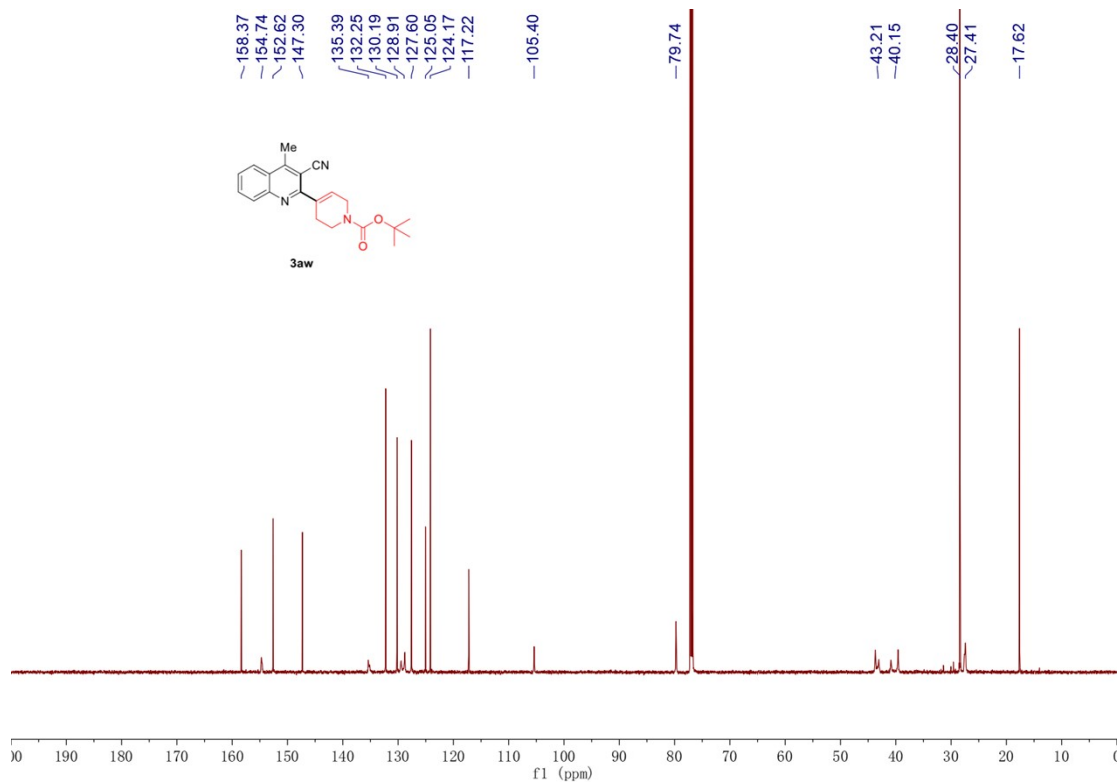

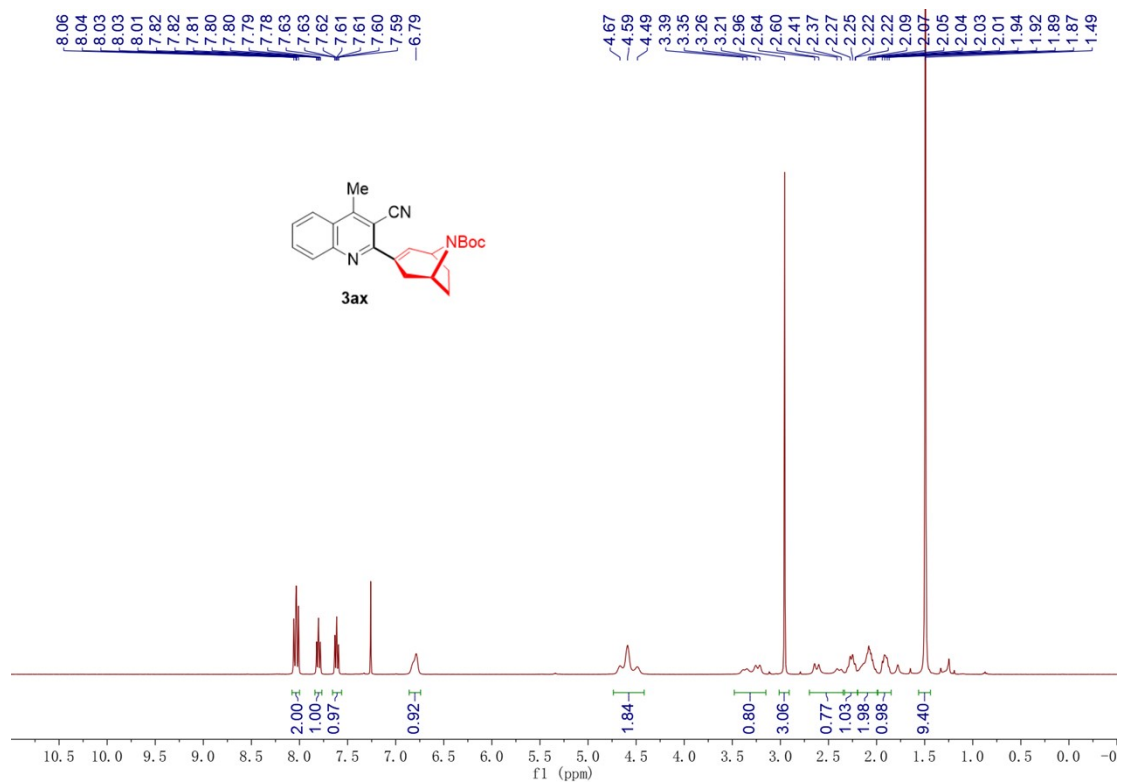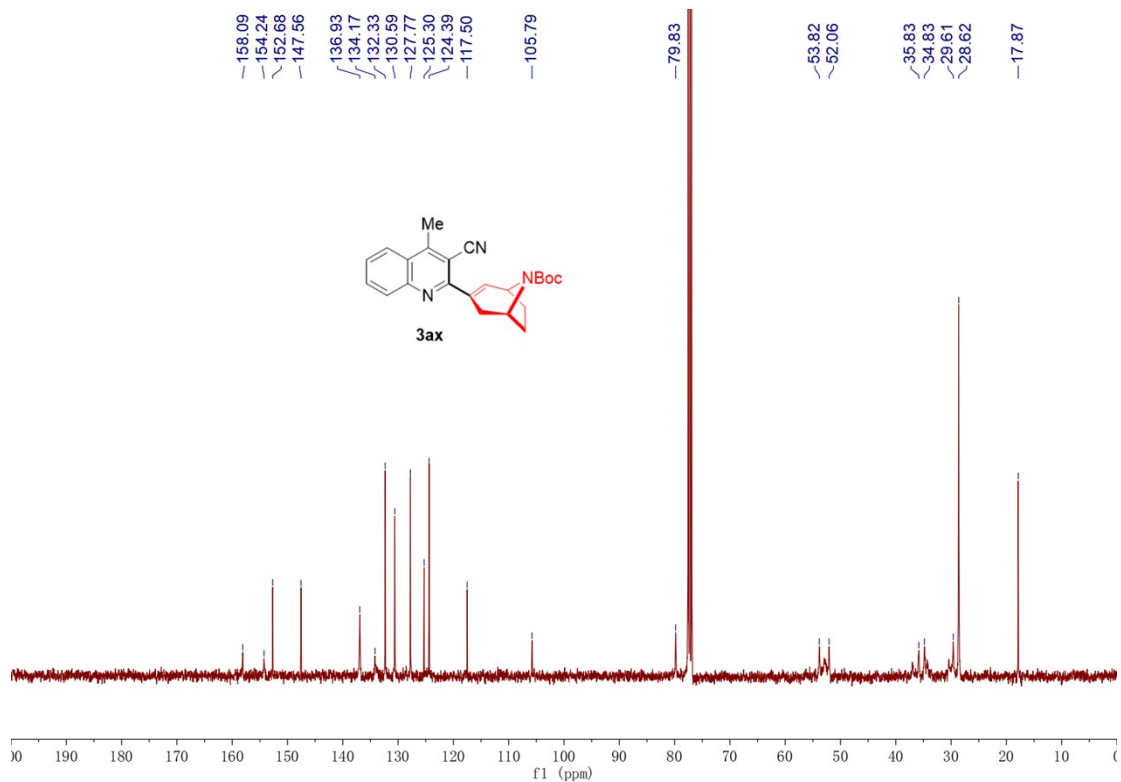

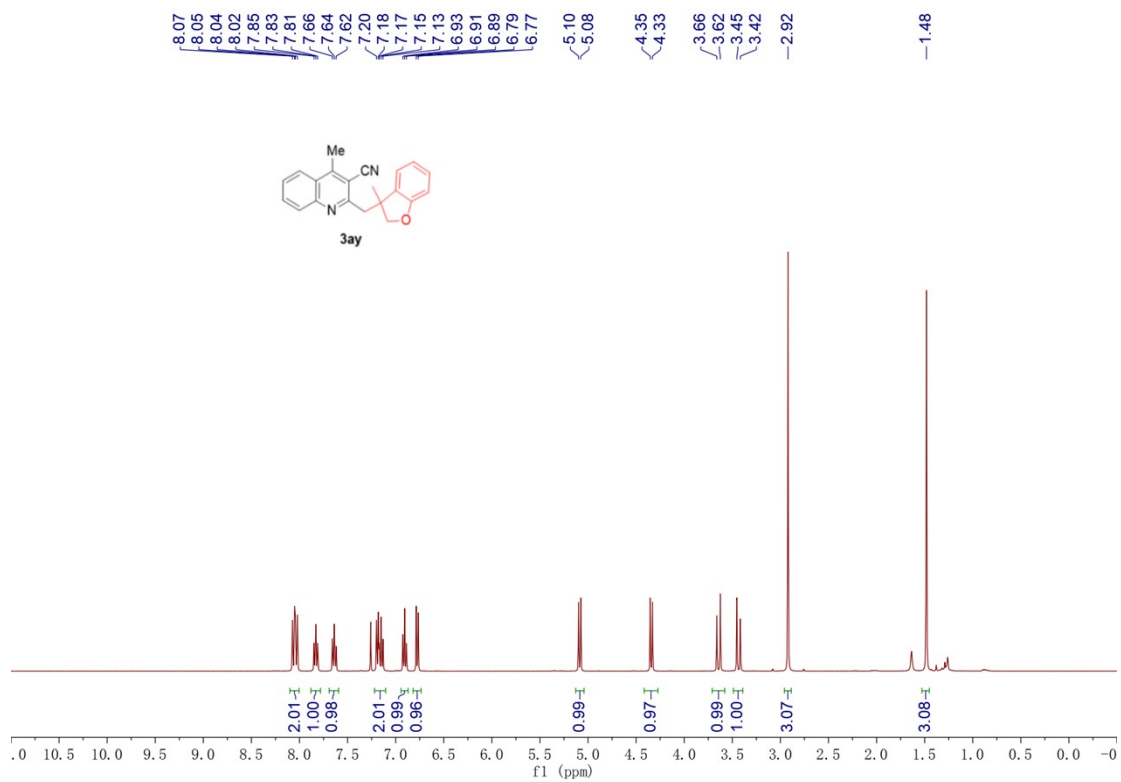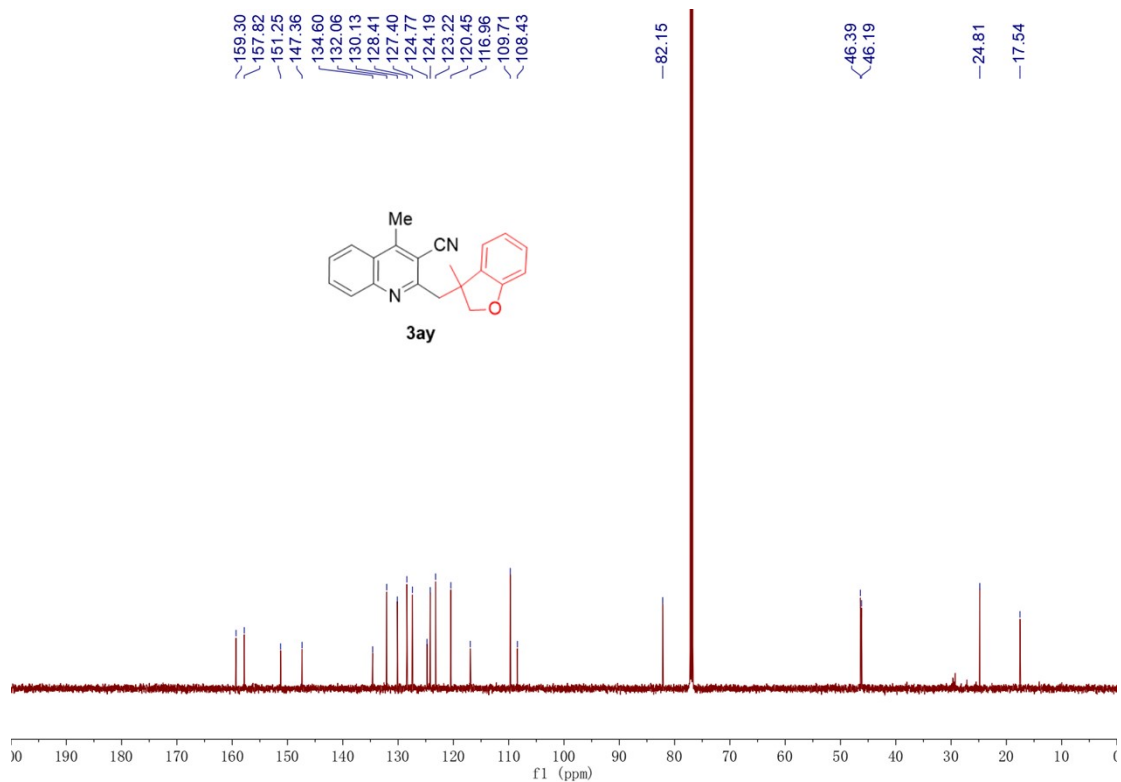

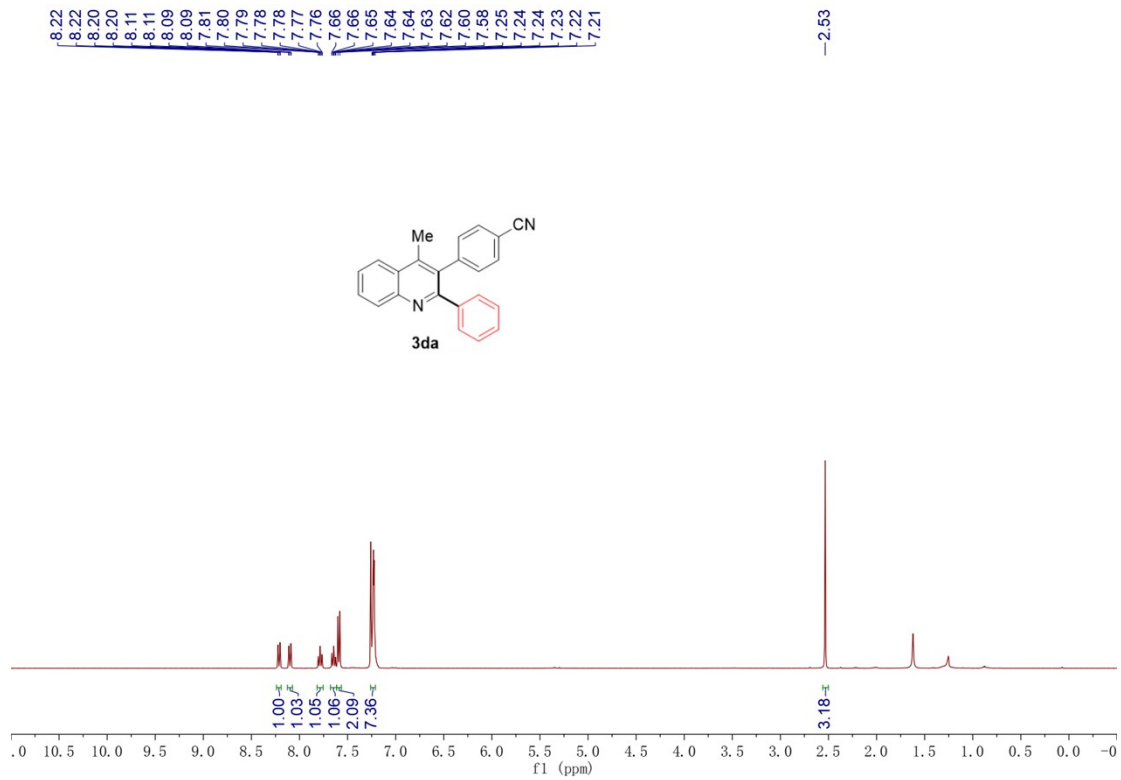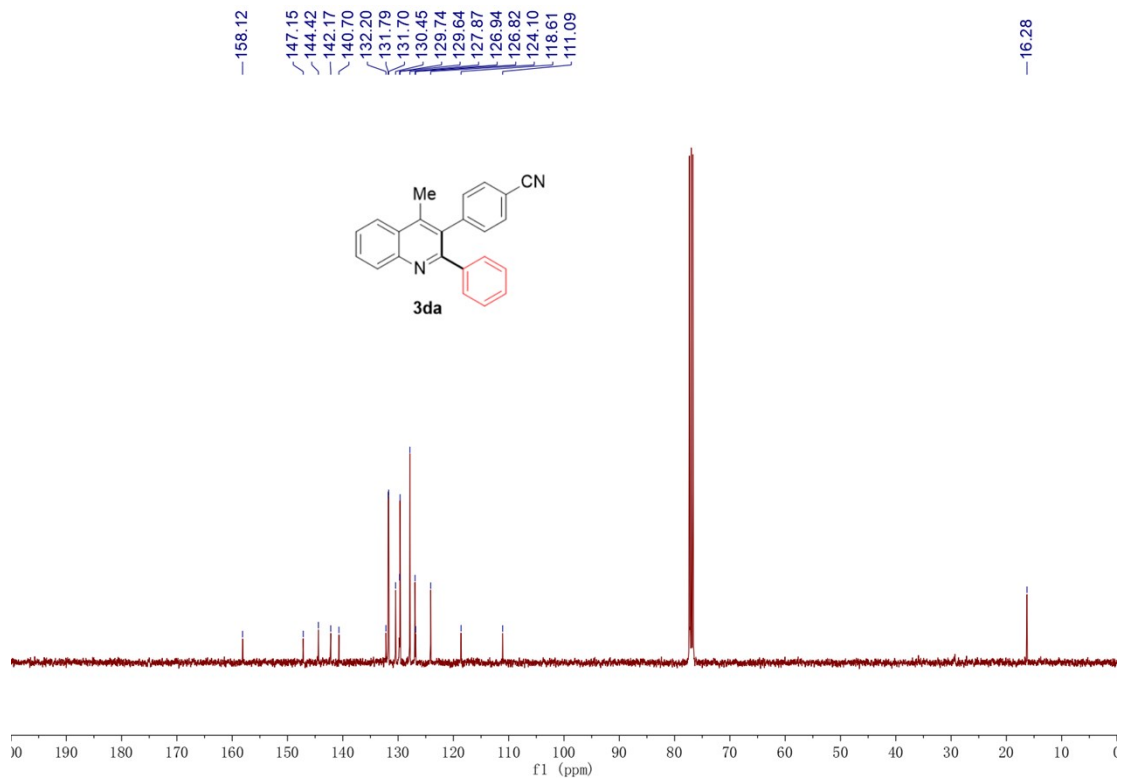

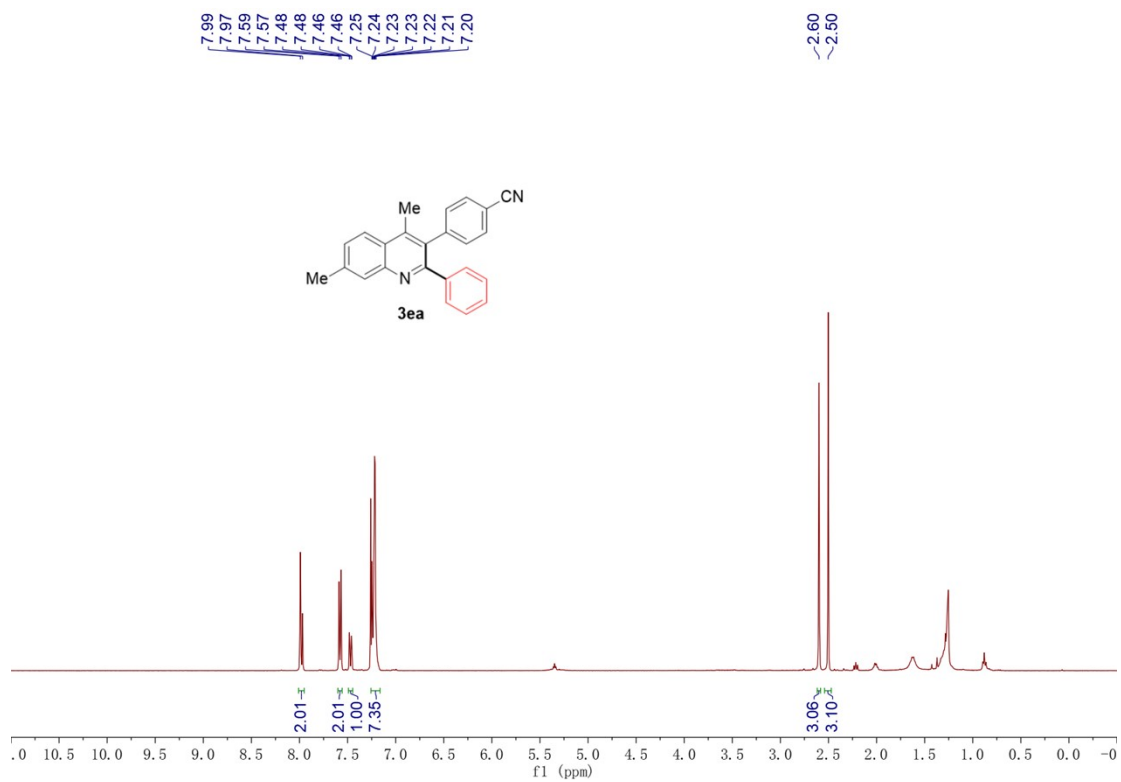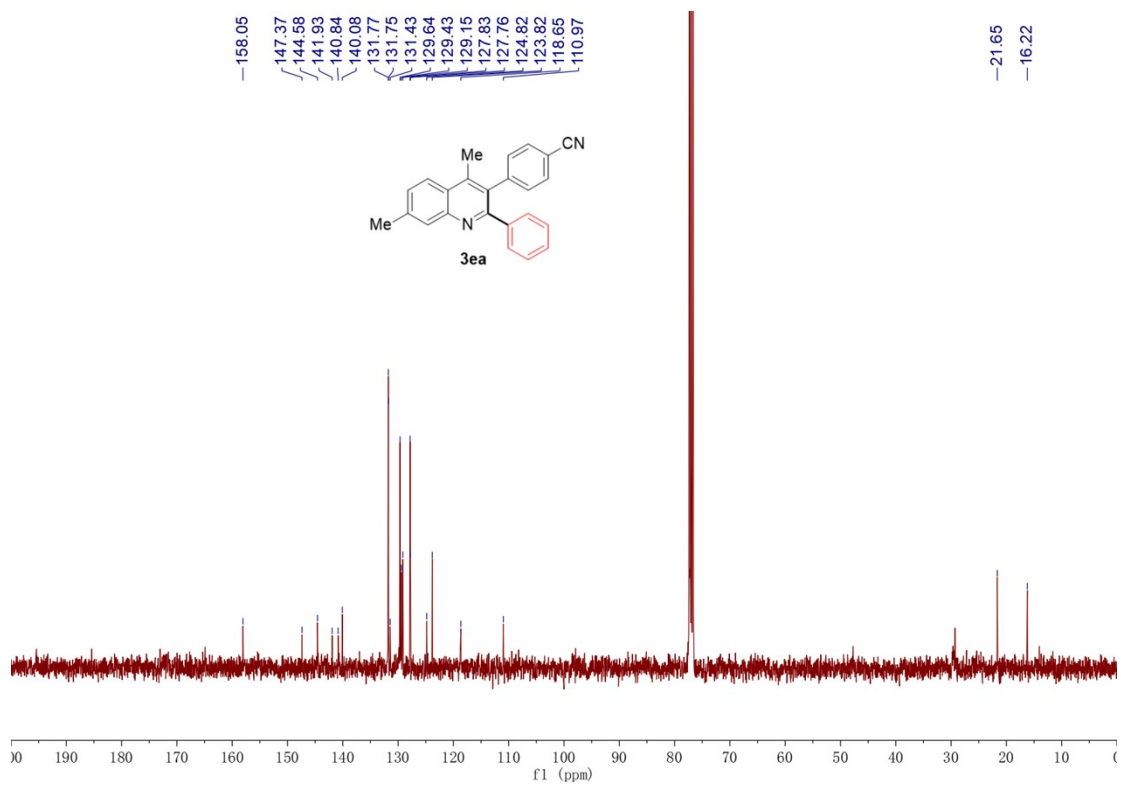

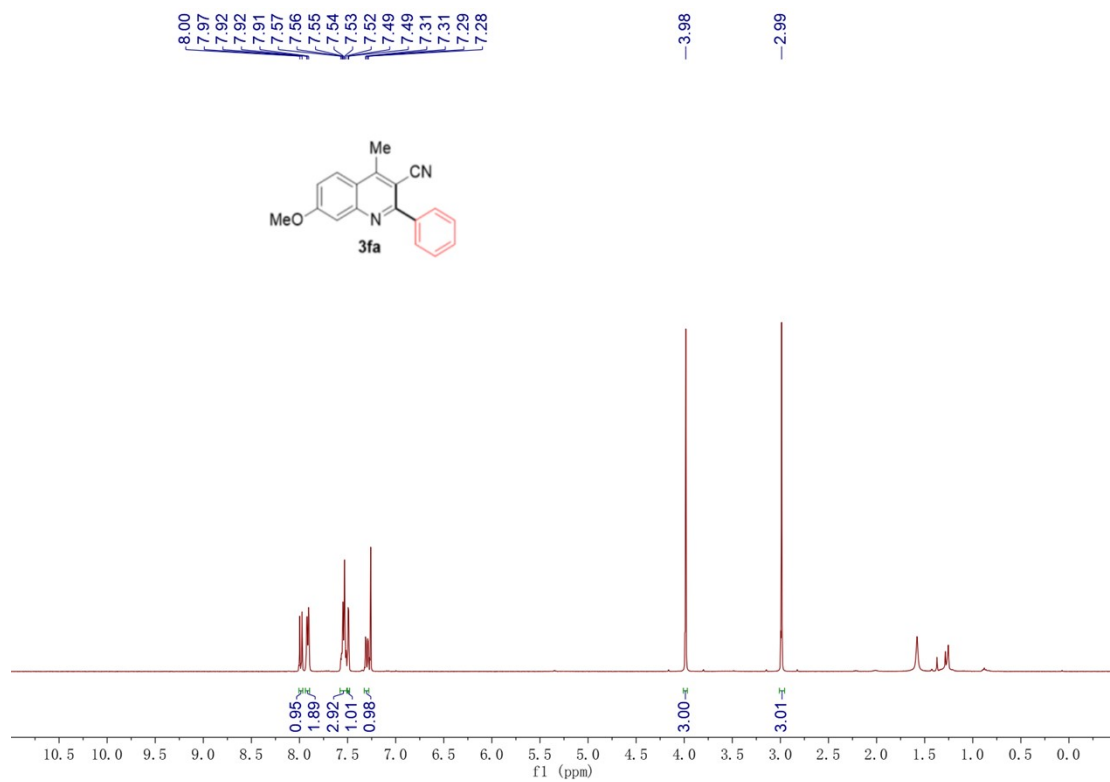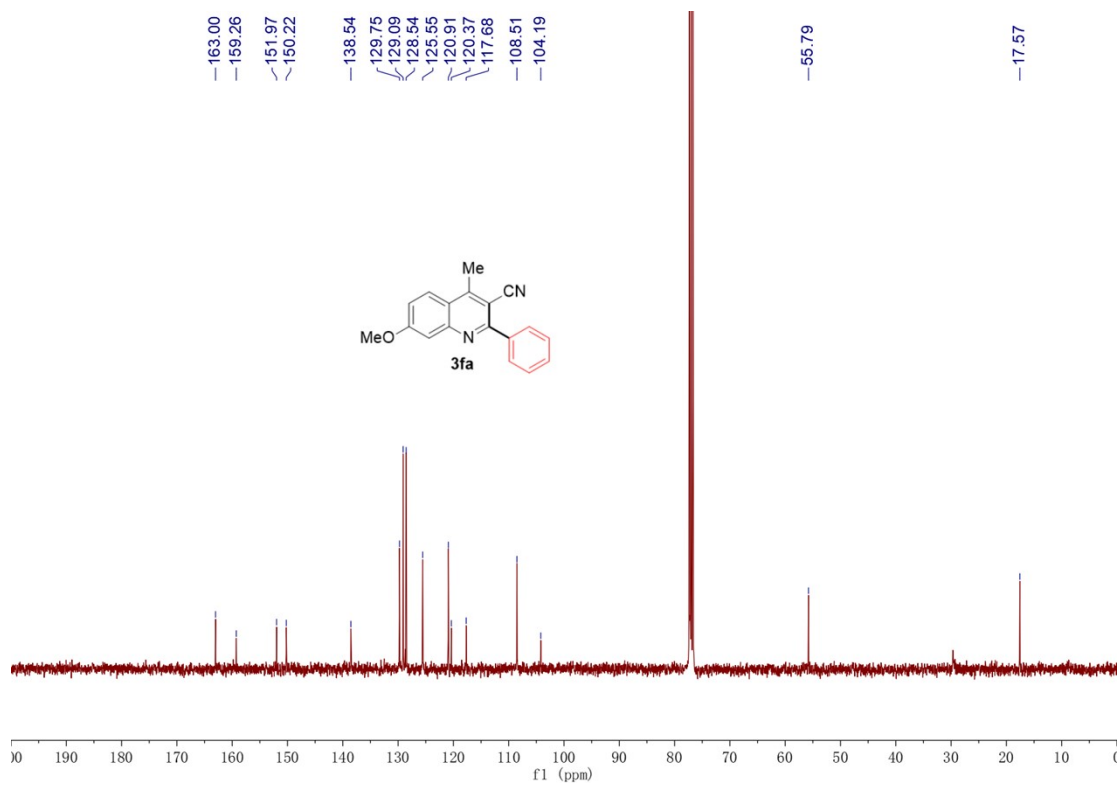

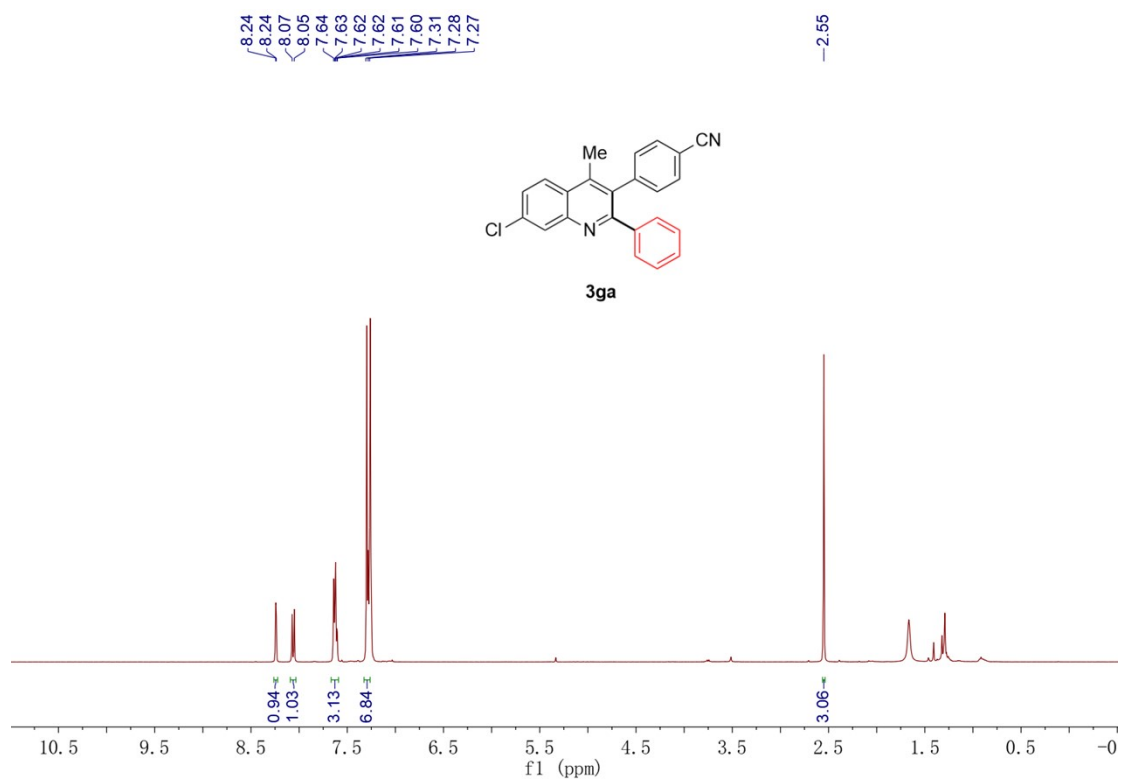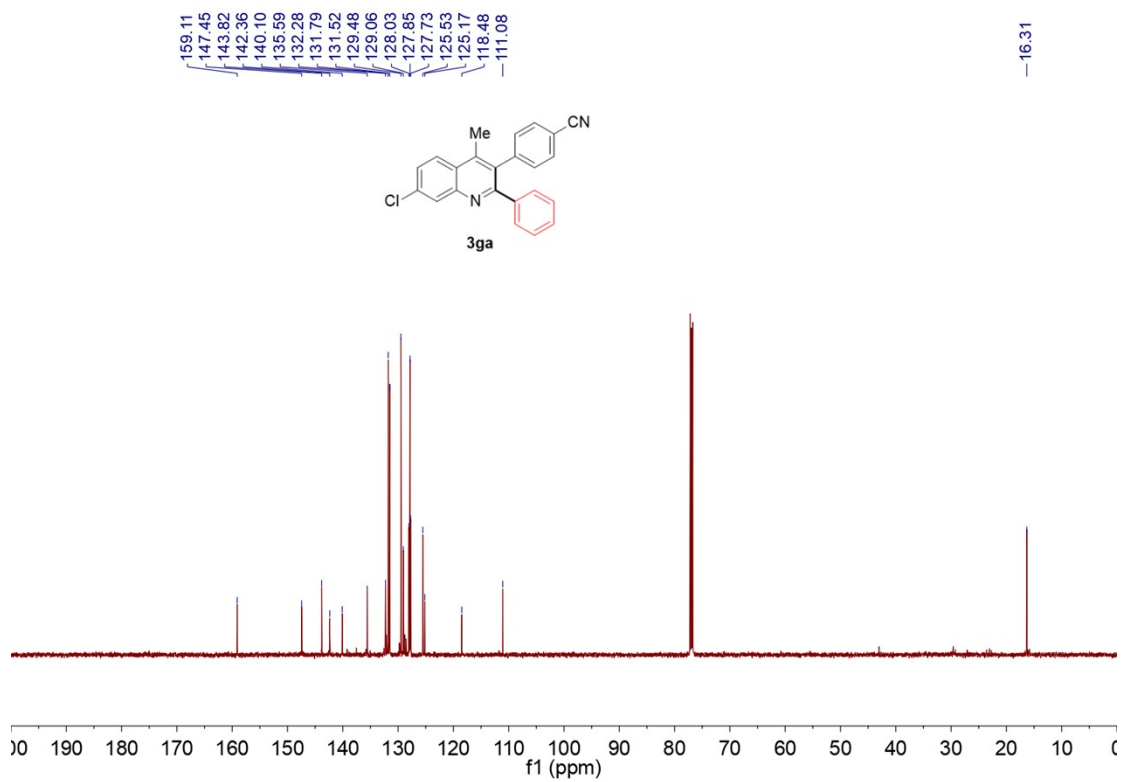



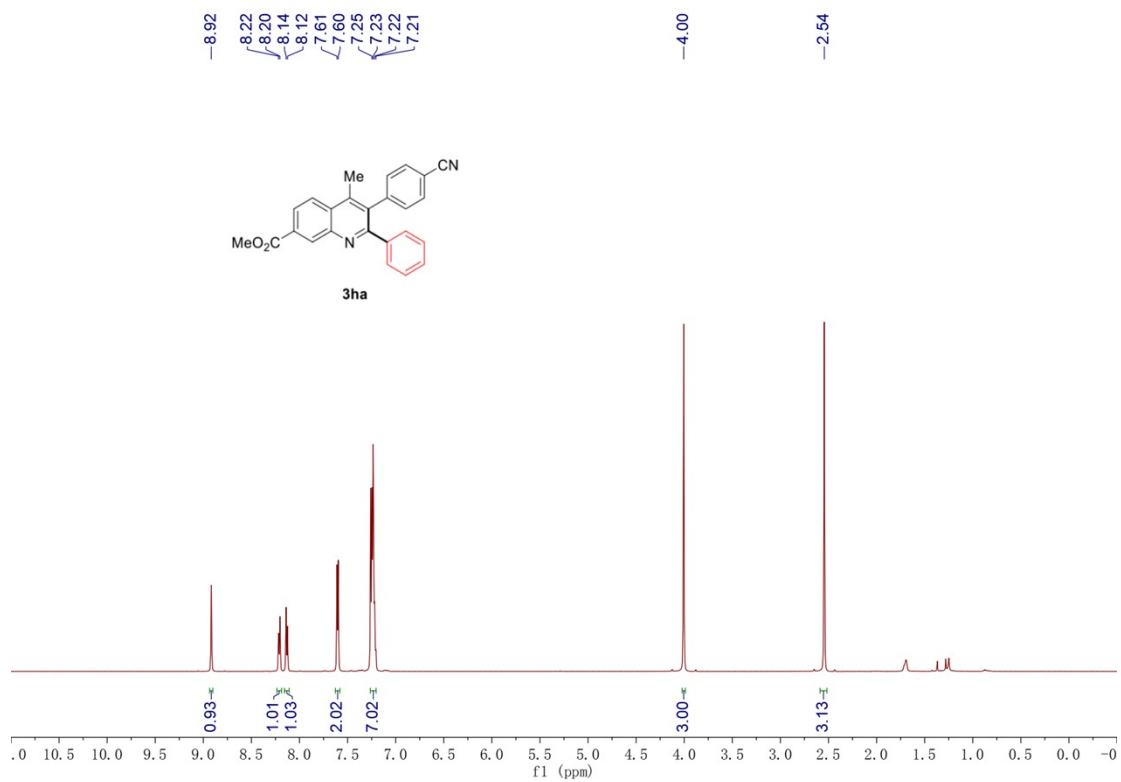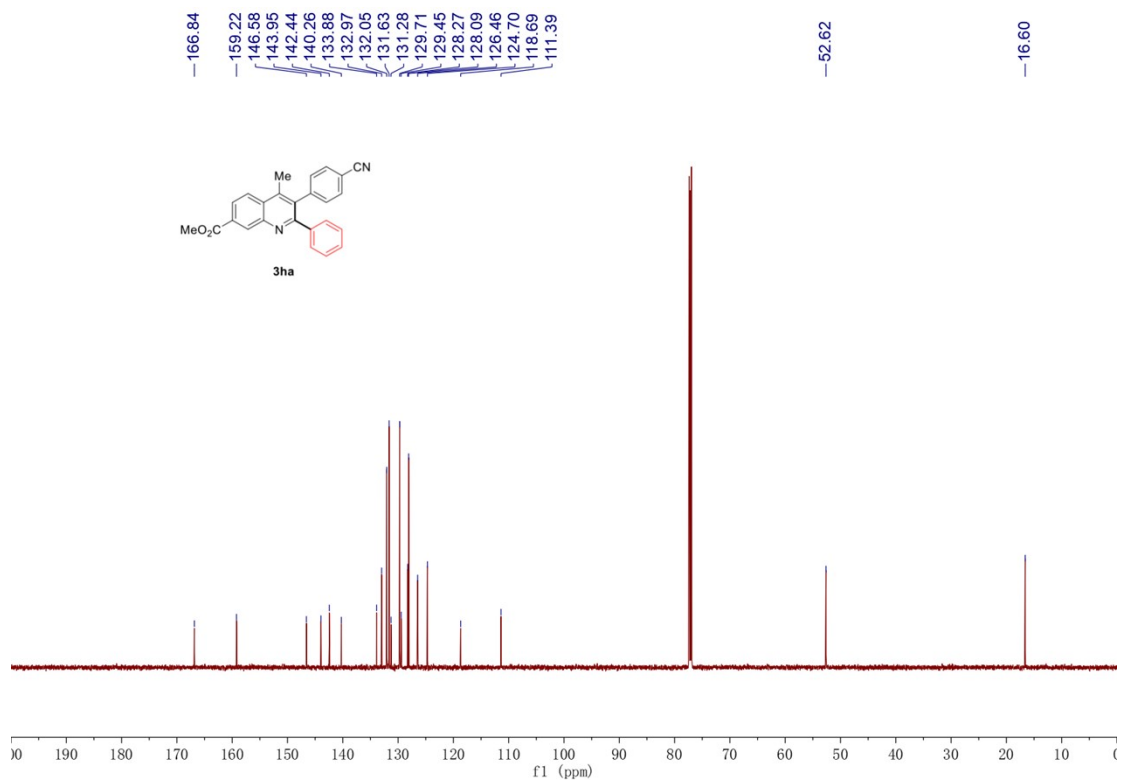

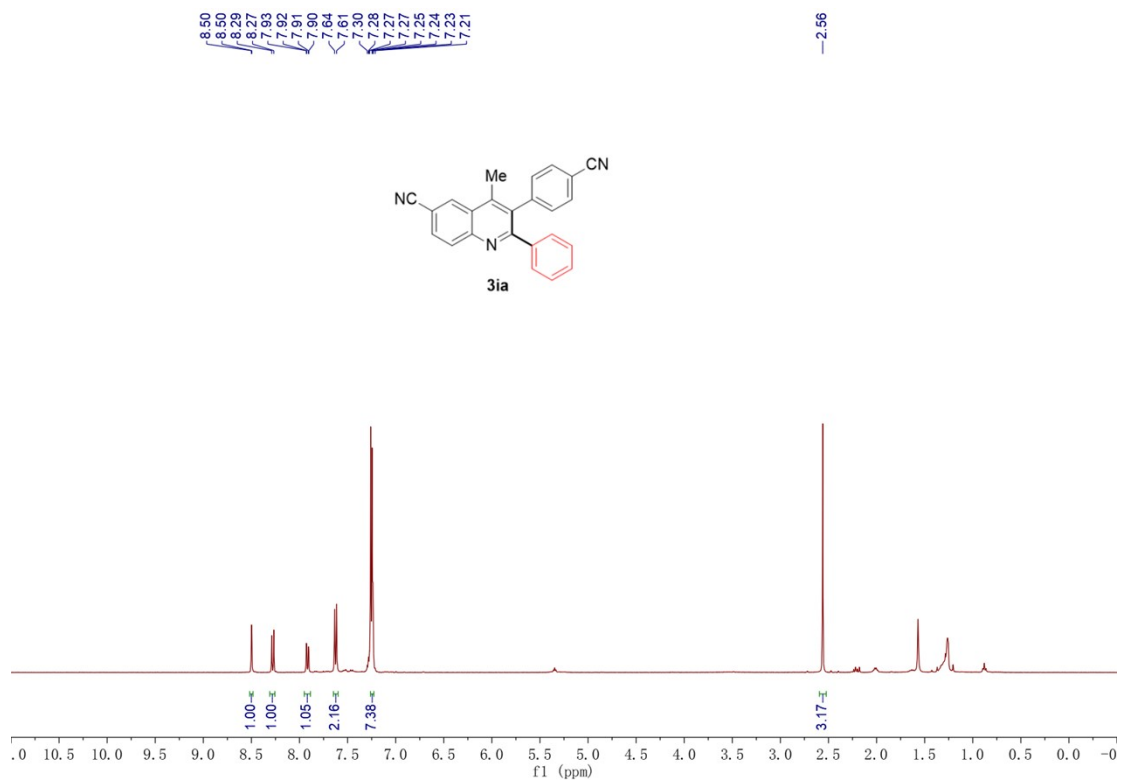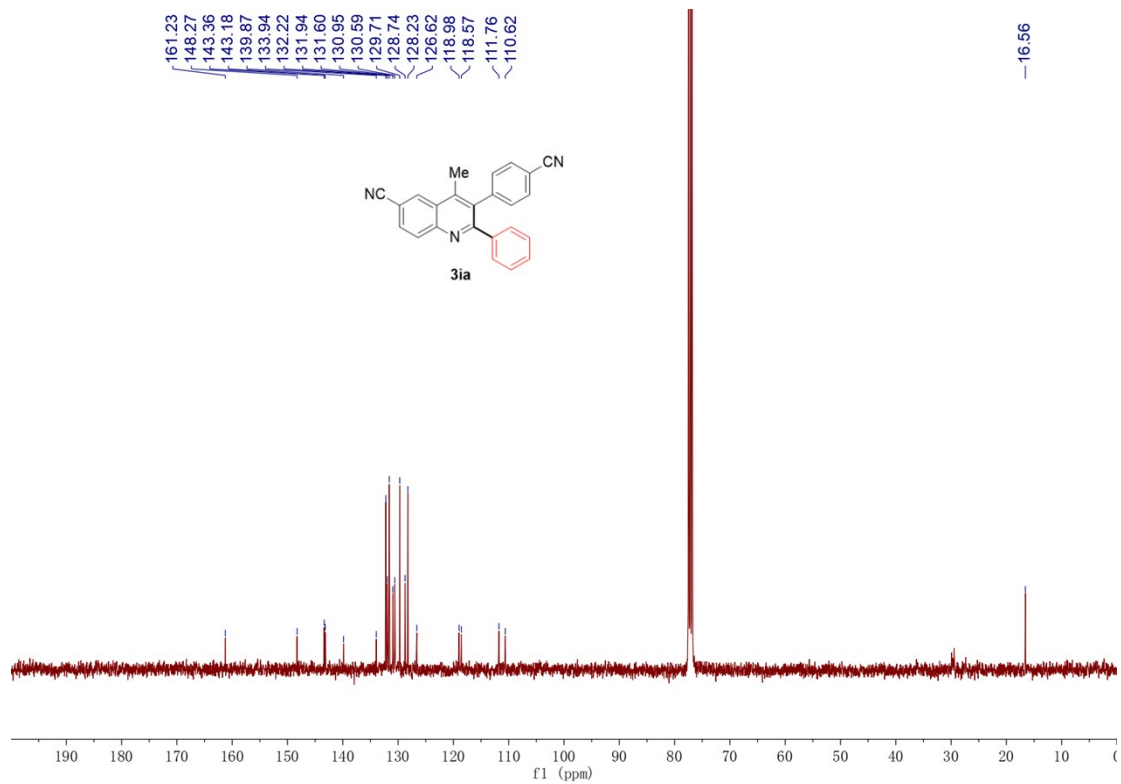

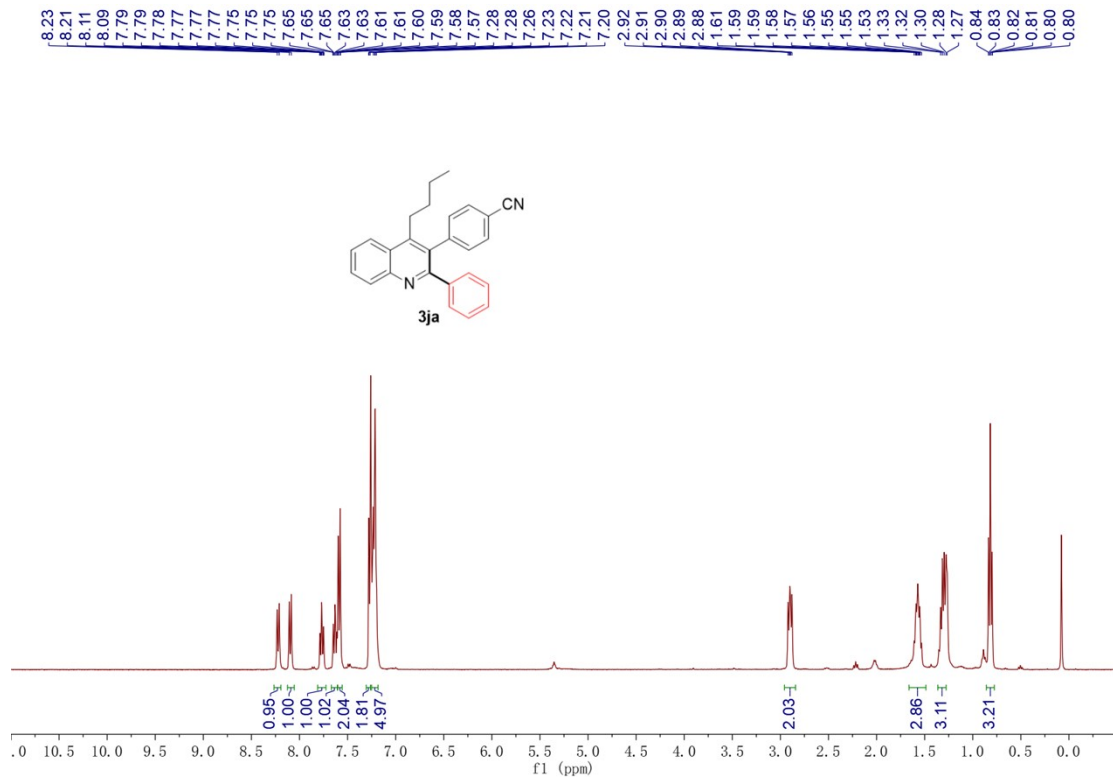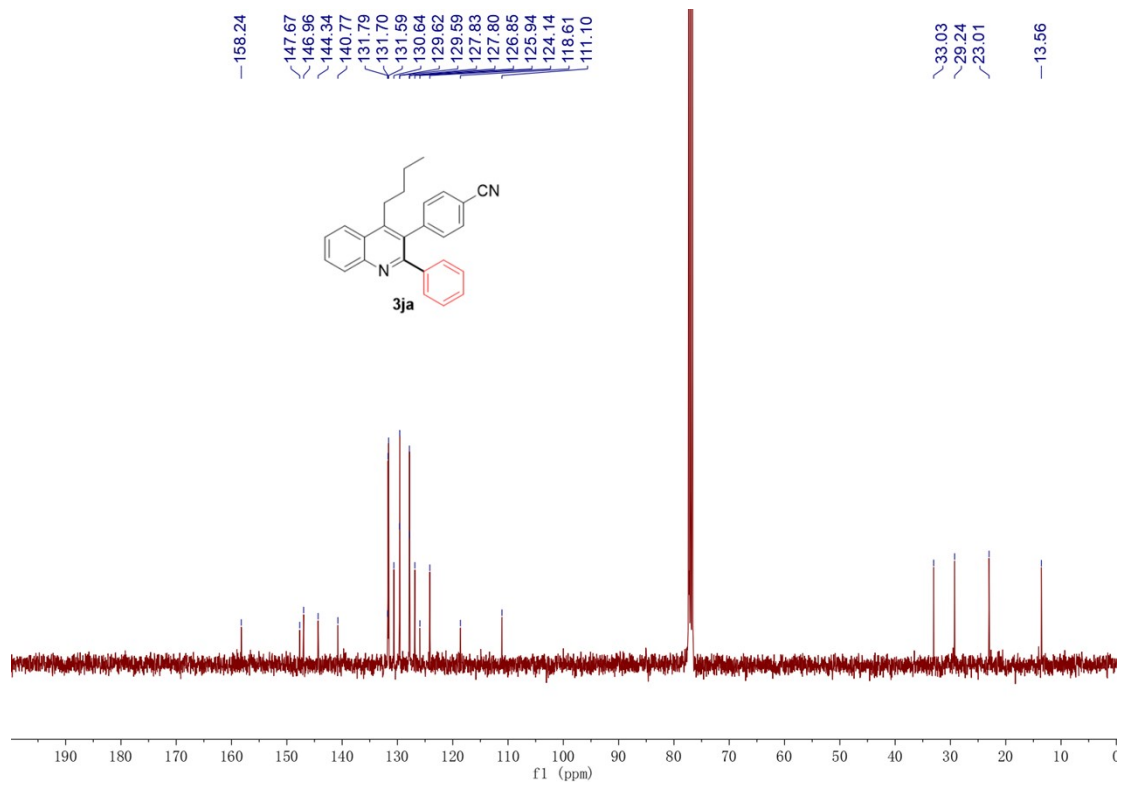

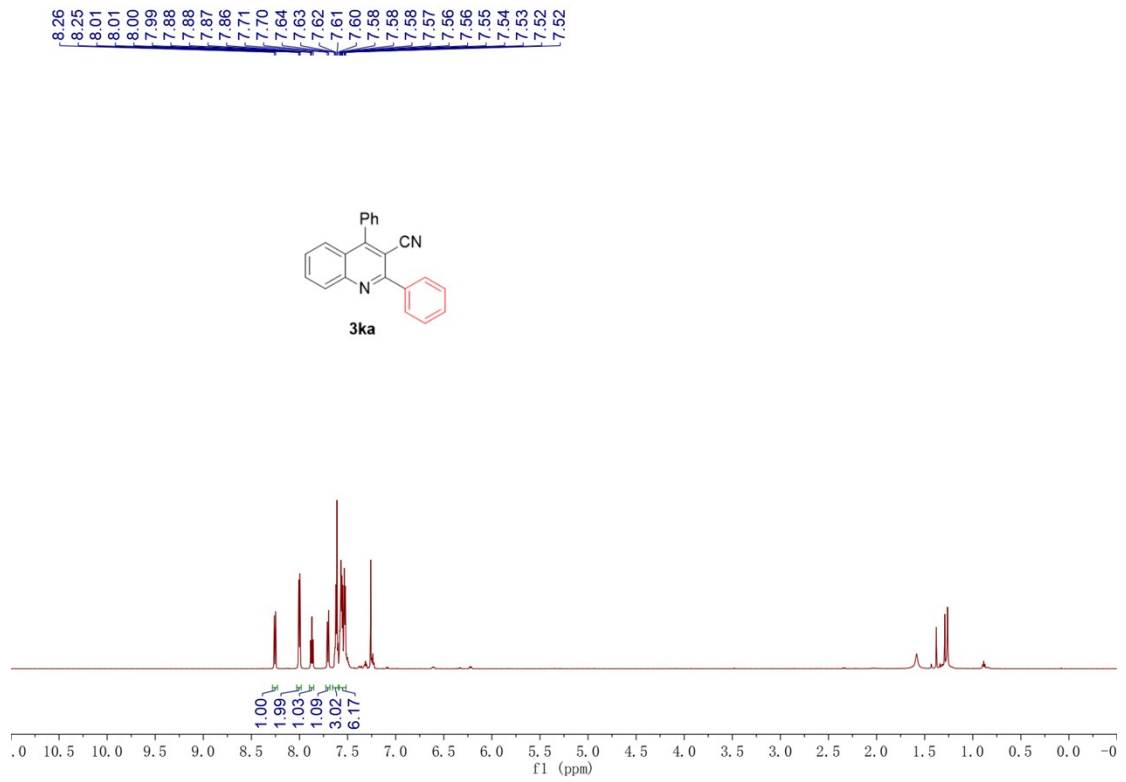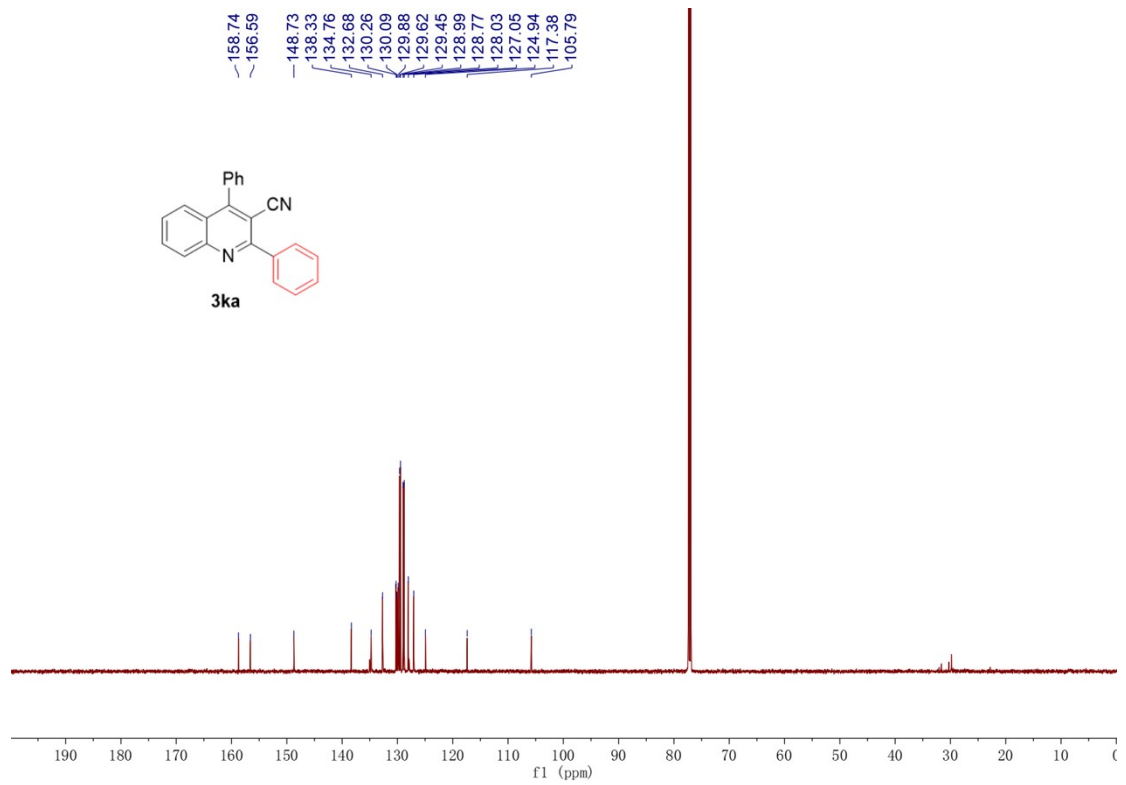

Supplement: d4cc05461j1.pdf [file d4cc05461j1.pdf]
